# Supplementary material for: A general route for synthesis of N-aryl phenoxazines via copper(i)-catalyzed N-, N-, and O-arylations of 2-aminophenols
Source: Royal Society of Chemistry journal article supplement (doi:10.1039/c4ra09593f), 2014-01-01

Supporting Online Material for

**A General Route for Synthesis of *N*-Aryl Phenoxazines via  
Copper(I)-Catalyzed *N*-, *N*-, and *O*-Arylations of  
2-Aminophenols**

Nan Liu, Bo Wang, Wenwen Chen, Chulong Liu, Xinyan Wang,\* Yuefei Hu\*

*Department of Chemistry, Tsinghua University, Beijing 100084, P. R. China*

[wangxinyan@mail.tsinghua.edu.cn](mailto:wangxinyan@mail.tsinghua.edu.cn) and [yfh@mail.tsinghua.edu.cn](mailto:yfh@mail.tsinghua.edu.cn)

1. Characterizations of compounds **5b-e** .....S2-S3
2. The <sup>1</sup>H NMR and <sup>13</sup>C NMR spectra for compounds **2a-x**.....S4-S51

## Experimental Section

All melting points were determined on a Yanaco melting point apparatus and were uncorrected. IR spectra were recorded as KBr pellets on a Nicolet FT-IR 5DX spectrometer. All spectra of  $^1\text{H}$  NMR (300 MHz) and  $^{13}\text{C}$  NMR (75 MHz) were recorded on a JEOL JNM-ECA 300 spectrometer in  $\text{CDCl}_3$  (otherwise as indicated). TMS was used as an internal reference and  $J$  values are given in Hz. HRMS were obtained on a Bruker microTOF-Q II spectrometer.

The substituted 2-[*N*-(2-chlorophenyl)amino]-phenols **5b** (R = H), **5c** (R = 4-Me), **5d** (R = 3-Me) and **5e** (R = 4-Cl) were prepared by the procedure reported in literature (D. Maiti, S. L. Buchwald, *J. Am. Chem. Soc.* **2009**, *131*, 17423–17429) and their analytical data are as following.

**2-(2-Chlorophenylamino)phenol (5b)**. White solid, 82%, mp 49-50 °C; IR  $\nu$  3506, 3376, 1591, 1497  $\text{cm}^{-1}$ ;  $^1\text{H}$  NMR  $\delta$  7.34 (d,  $J = 7.9$ , 1H), 7.19-7.03 (m, 4H), 6.94-6.91 (m, 1H), 6.80-6.75 (m, 1H), 6.60 (d,  $J = 8.2$ , 1H), 5.85 (s, 0.89H), 5.73 (s, 0.83H) ppm;  $^{13}\text{C}$  NMR  $\delta$  152.1, 142.1, 129.4, 127.8, 127.5, 127.4, 126.4, 121.1, 120.7, 120.2, 115.6, 114.7 ppm; HRMS (ESI-TOF) ( $m/z$ ): Calcd for  $\text{C}_{12}\text{H}_{10}\text{ClNO}$ ,  $[\text{M}+\text{H}]^+$  220.0524; found 220.0520.

**2-(2-Chlorophenylamino)-4-methylphenol (5c)**. Brown solid, 85%, mp 74-75 °C; IR  $\nu$  3495, 3345, 2967, 2862, 1589, 1496  $\text{cm}^{-1}$ ;  $^1\text{H}$  NMR  $\delta$  7.33 (d,  $J = 7.9$ , 1H), 7.09-7.03 (m, 1H), 6.98-6.89 (m, 3H), 6.80-6.74 (m, 1H), 6.60 (d,  $J = 8.3$ , 1H), 5.69 (s, 0.90H), 5.60 (s, 0.96H), 2.25 (s, 3H) ppm;  $^{13}\text{C}$  NMR  $\delta$  149.7, 142.2, 130.5, 129.4, 128.0, 127.8, 127.0, 126.8, 120.6, 120.0, 115.3, 114.7, 20.5 ppm; HRMS (ESI-TOF) ( $m/z$ ): Calcd for  $\text{C}_{13}\text{H}_{12}\text{ClNO}$ ,  $[\text{M}+\text{H}]^+$  234.0680; found 234.0674.

**2-(2-Chlorophenylamino)-3-methylphenol (5d)**. White solid, 79%, mp 90-91 °C; IR  $\nu$  3448, 3359, 2950, 2856, 1595, 1498, 1474  $\text{cm}^{-1}$ ;  $^1\text{H}$  NMR  $\delta$  7.34 (d,  $J = 7.9$ , 1H), 7.18-7.12 (m, 1H), 7.06-7.00 (m, 1H), 6.91 (d,  $J = 7.5$ , 1H), 6.82-6.74 (m, 2H), 6.33 (d,  $J = 7.9$ , 1H), 6.16 (s, 0.97H), 5.50 (s, 0.82H), 2.10 (s, 3H) ppm;  $^{13}\text{C}$  NMR  $\delta$  154.1,

142.2, 137.2, 129.4, 128.4, 128.0, 125.3, 122.3, 120.1, 120.0, 113.8, 112.6, 17.5 ppm;  
HRMS (ESI-TOF) ( $m/z$ ): Calcd for  $C_{13}H_{12}ClNO$ ,  $[M+H]^+$  234.0680; found 234.0678.

**2-(2-Chlorophenylamino)-4-chlorophenol (5e).** White solid, 74%, mp 81-83 °C;  
IR  $\nu$  3416, 3182, 1608, 1527  $cm^{-1}$ ;  $^1H$  NMR  $\delta$  7.36 (d,  $J = 7.9$ , 1H), 7.17-7.07 (m, 3H),  
6.68 (d,  $J = 8.6$ , 1H), 6.86-6.80 (m, 1H), 6.70 (d,  $J = 7.9$ , 1H), 5.78 (s, 0.96H), 5.63 (s,  
0.98H) ppm;  $^{13}C$  NMR  $\delta$  149.9, 141.0, 129.6, 128.9, 127.9, 126.5, 125.5, 124.9, 121.3,  
121.0, 116.5, 115.3 ppm; HRMS (ESI-TOF) ( $m/z$ ): Calcd for  $C_{12}H_9Cl_2NO$ ,  $[M+H]^+$   
254.0134; found 254.0132.

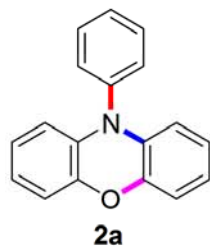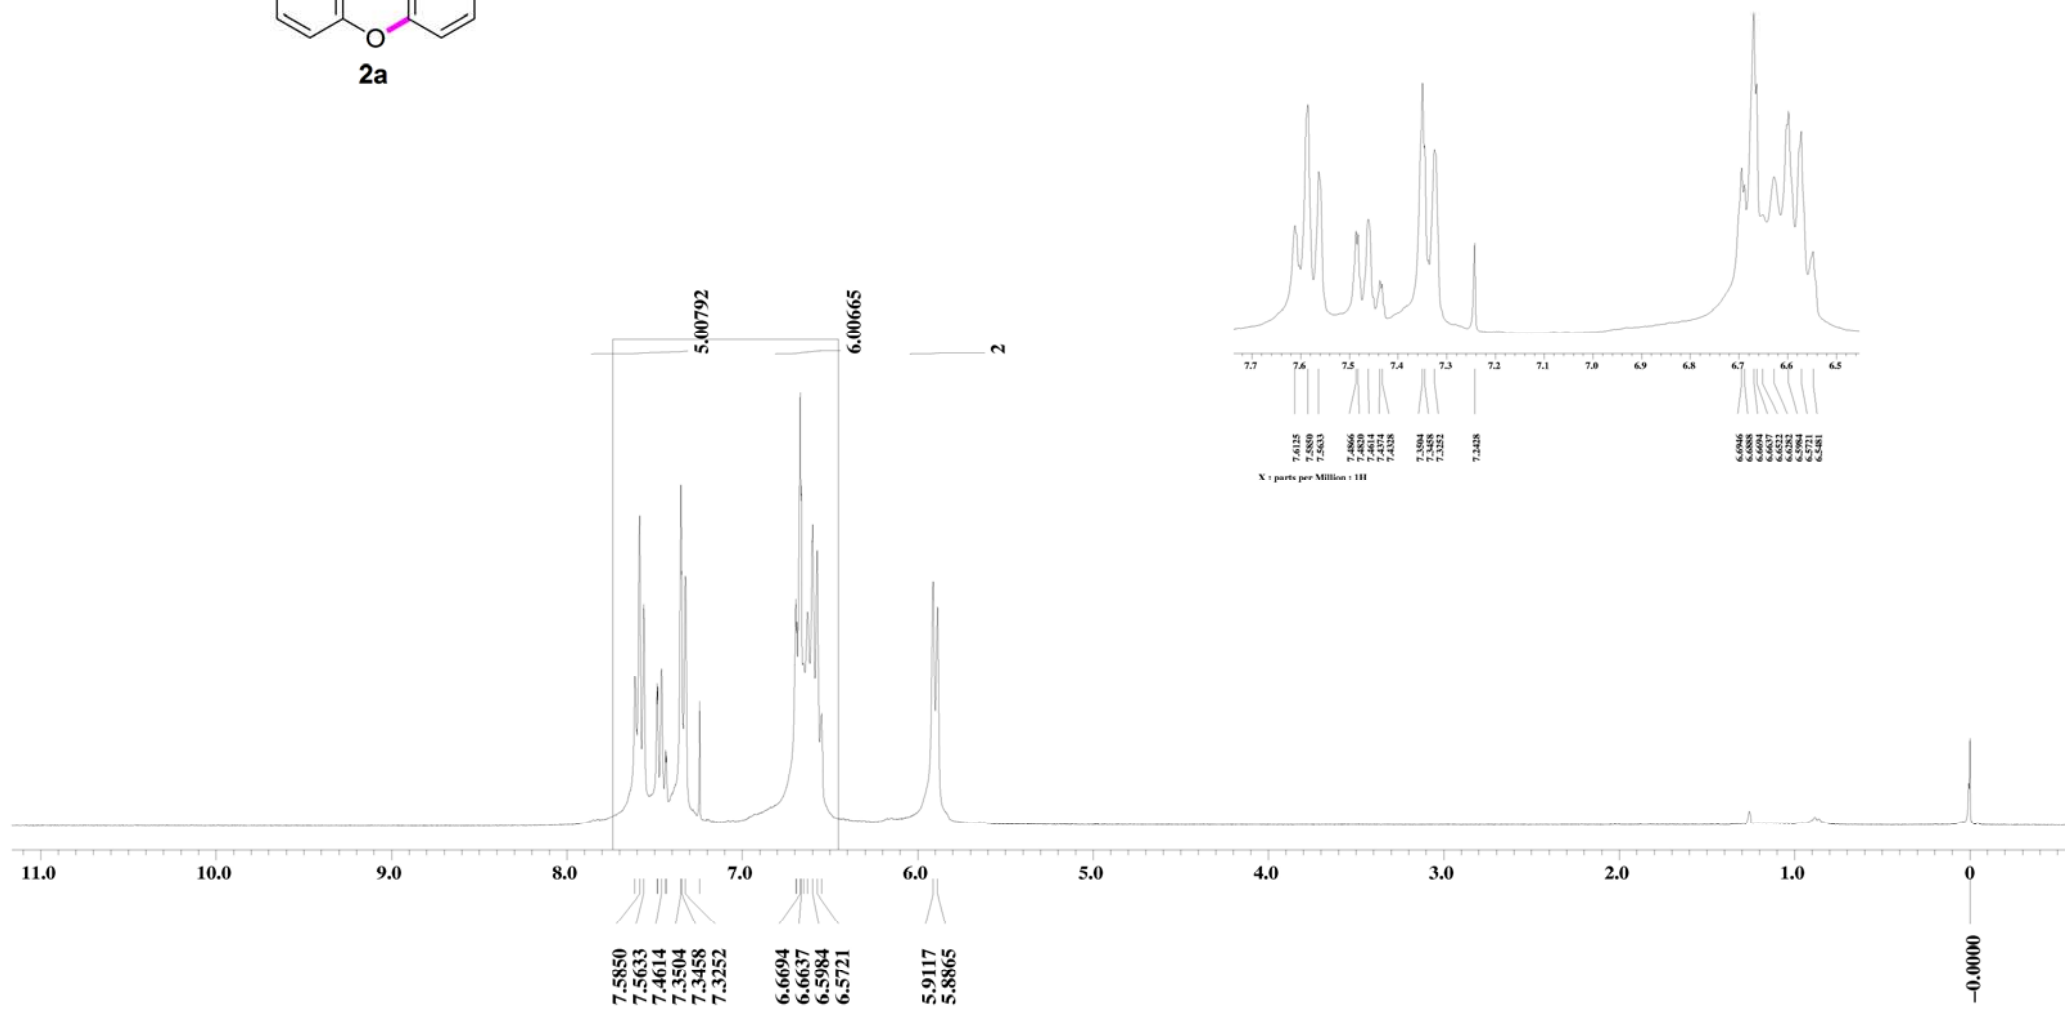

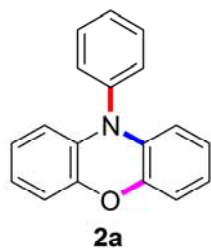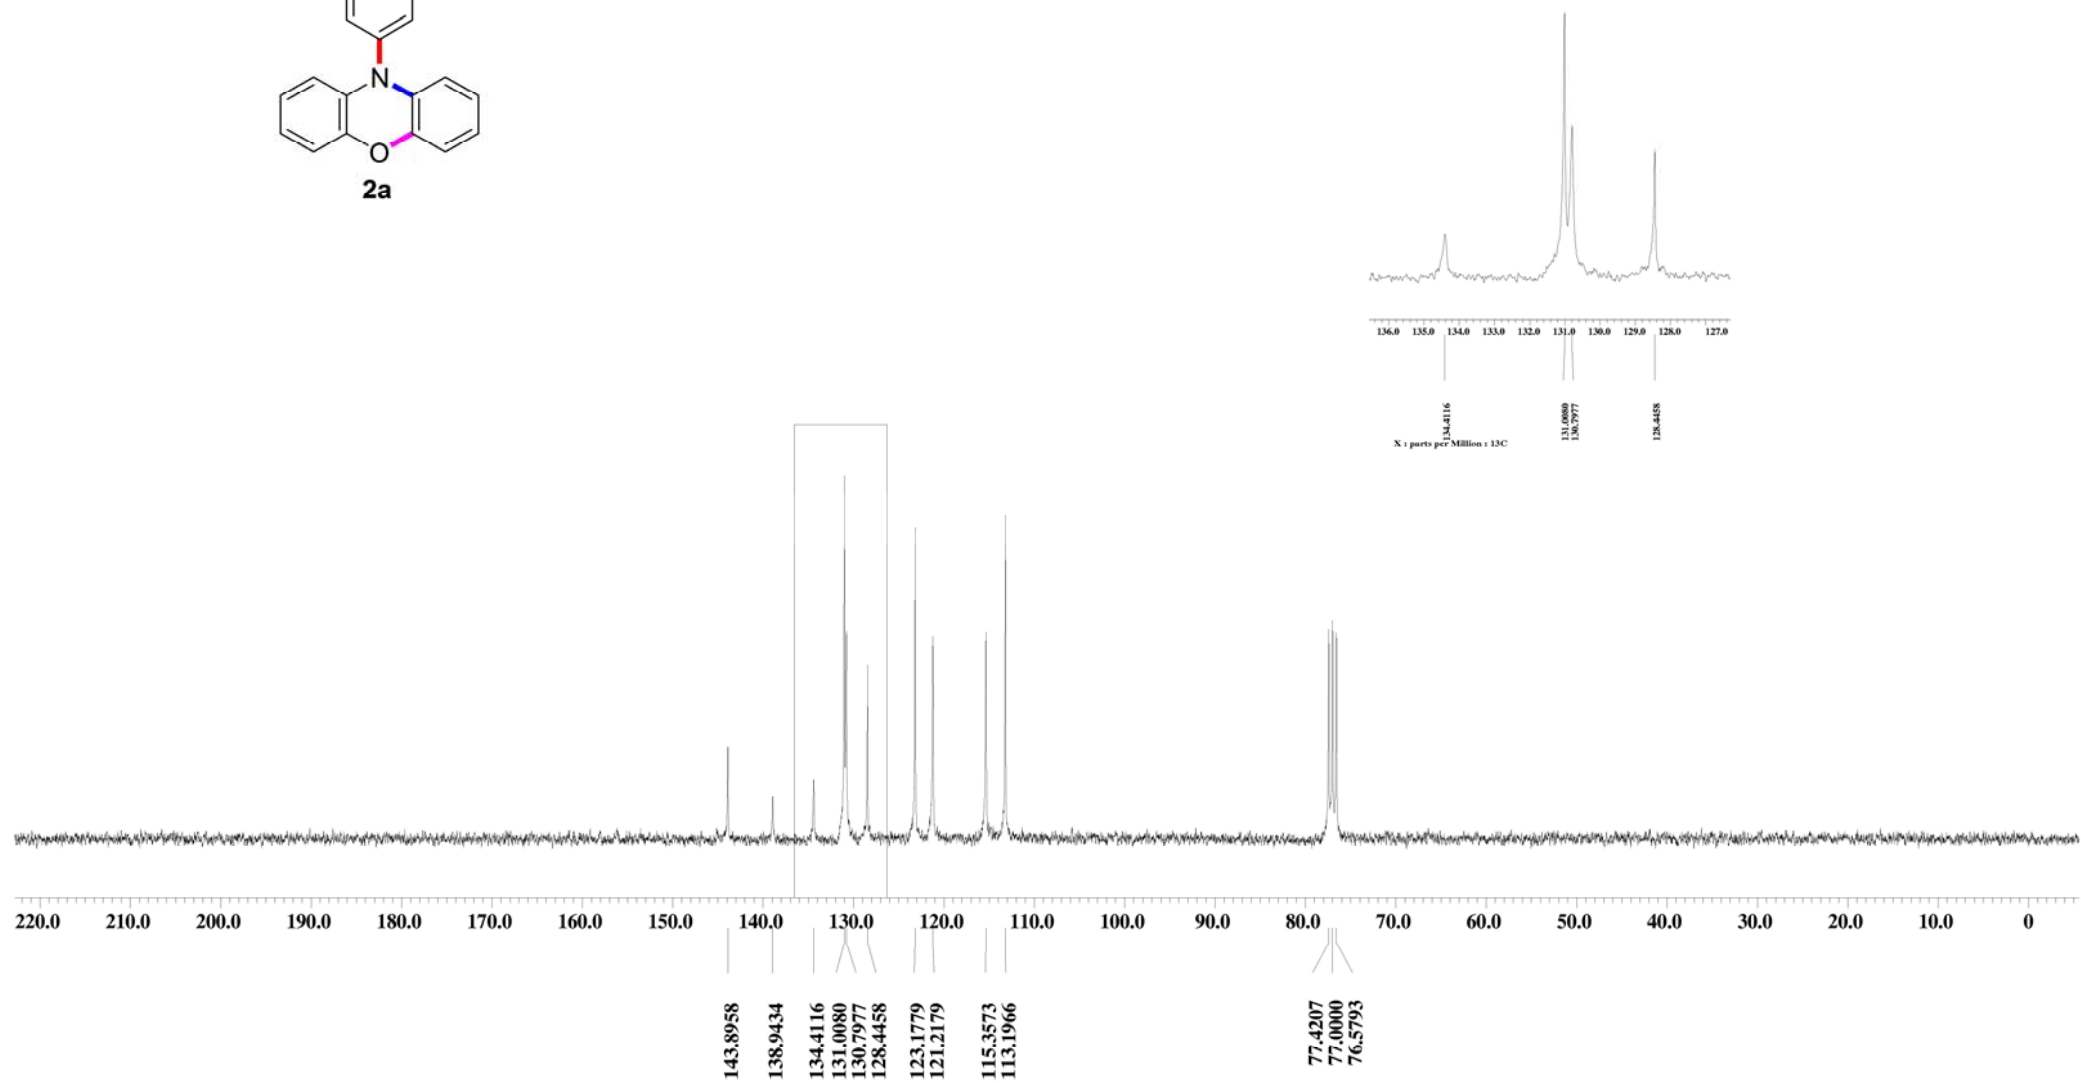

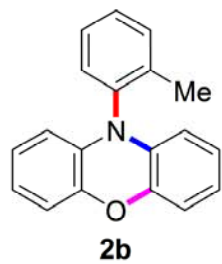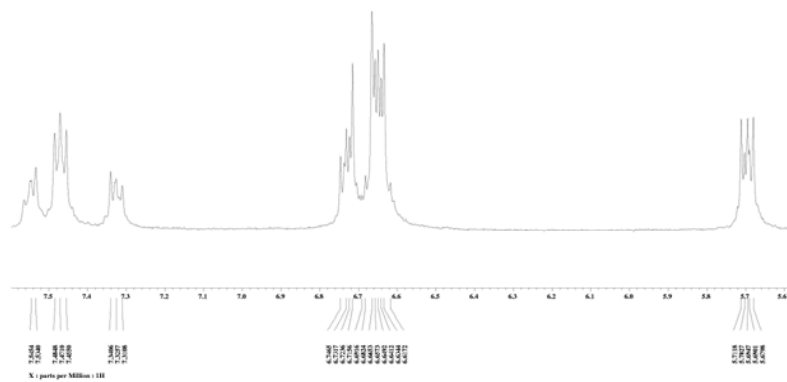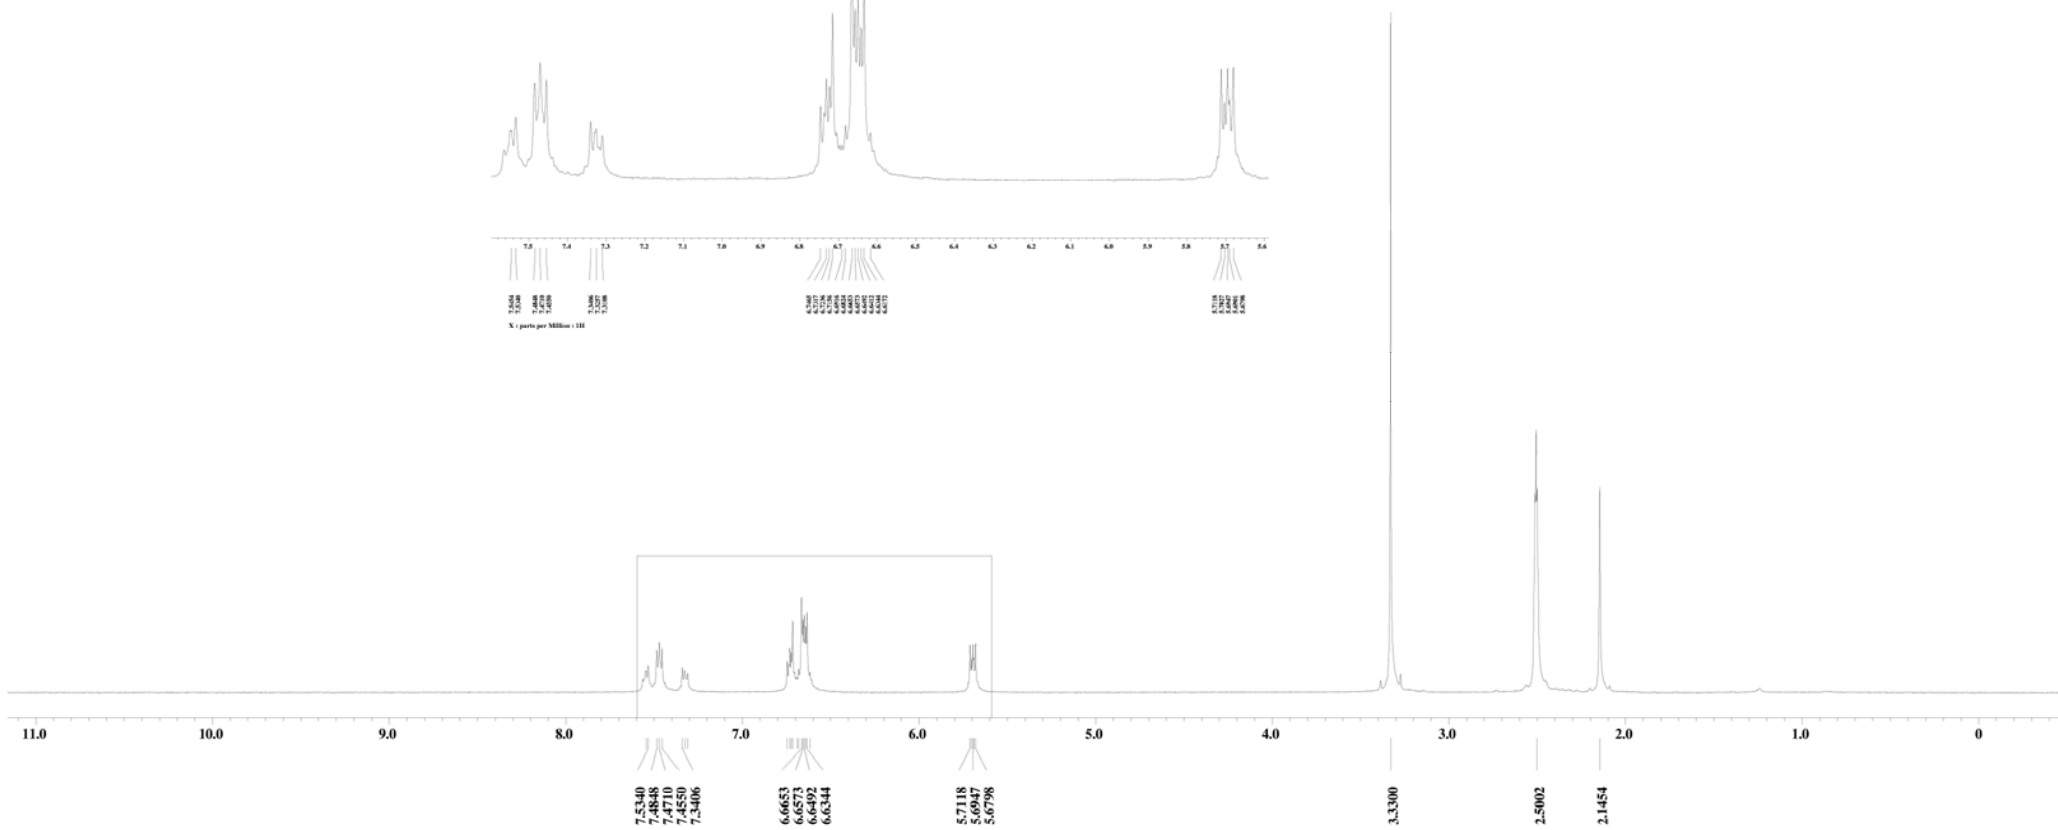

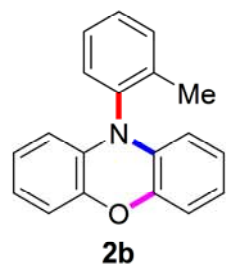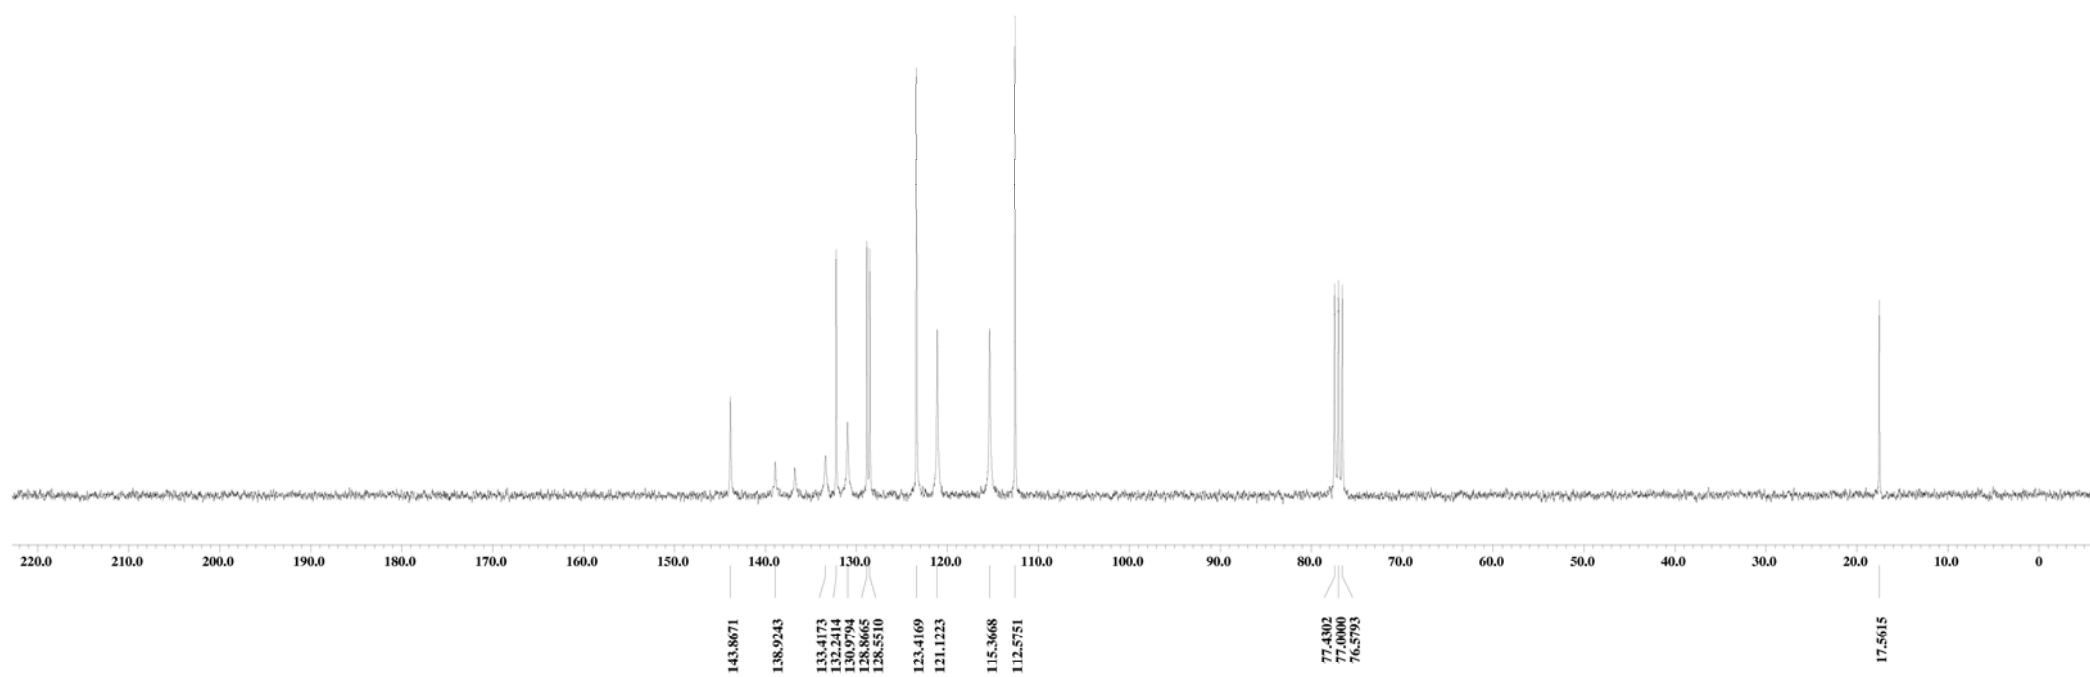

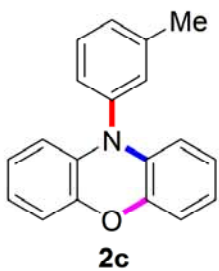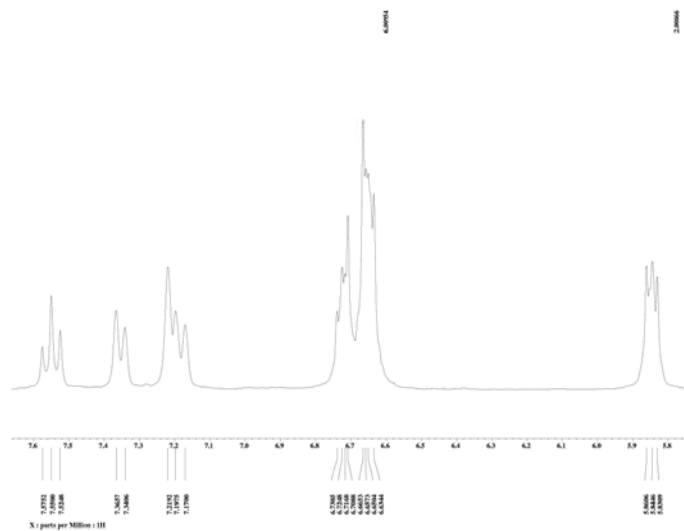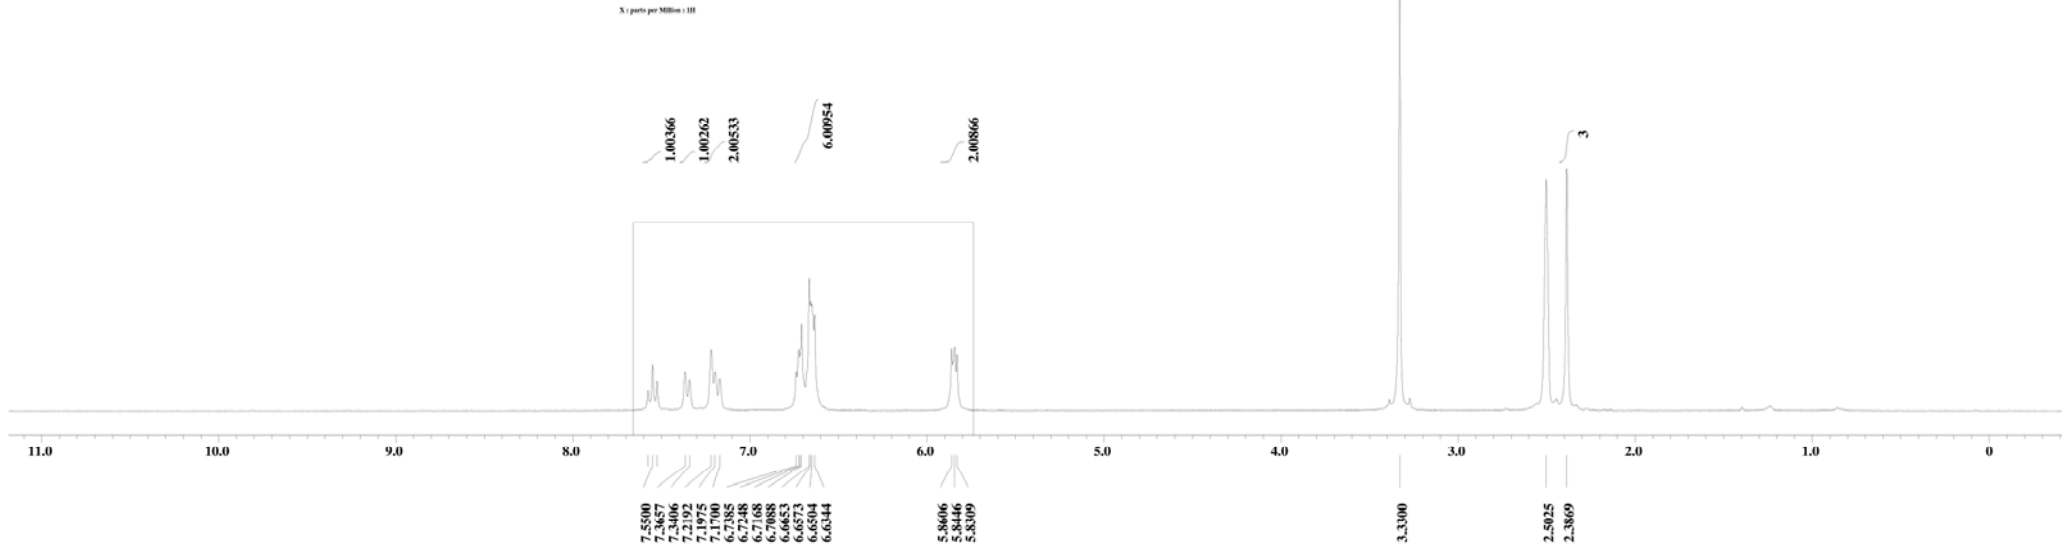



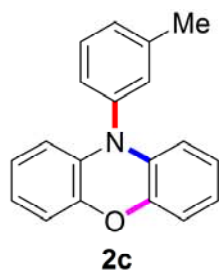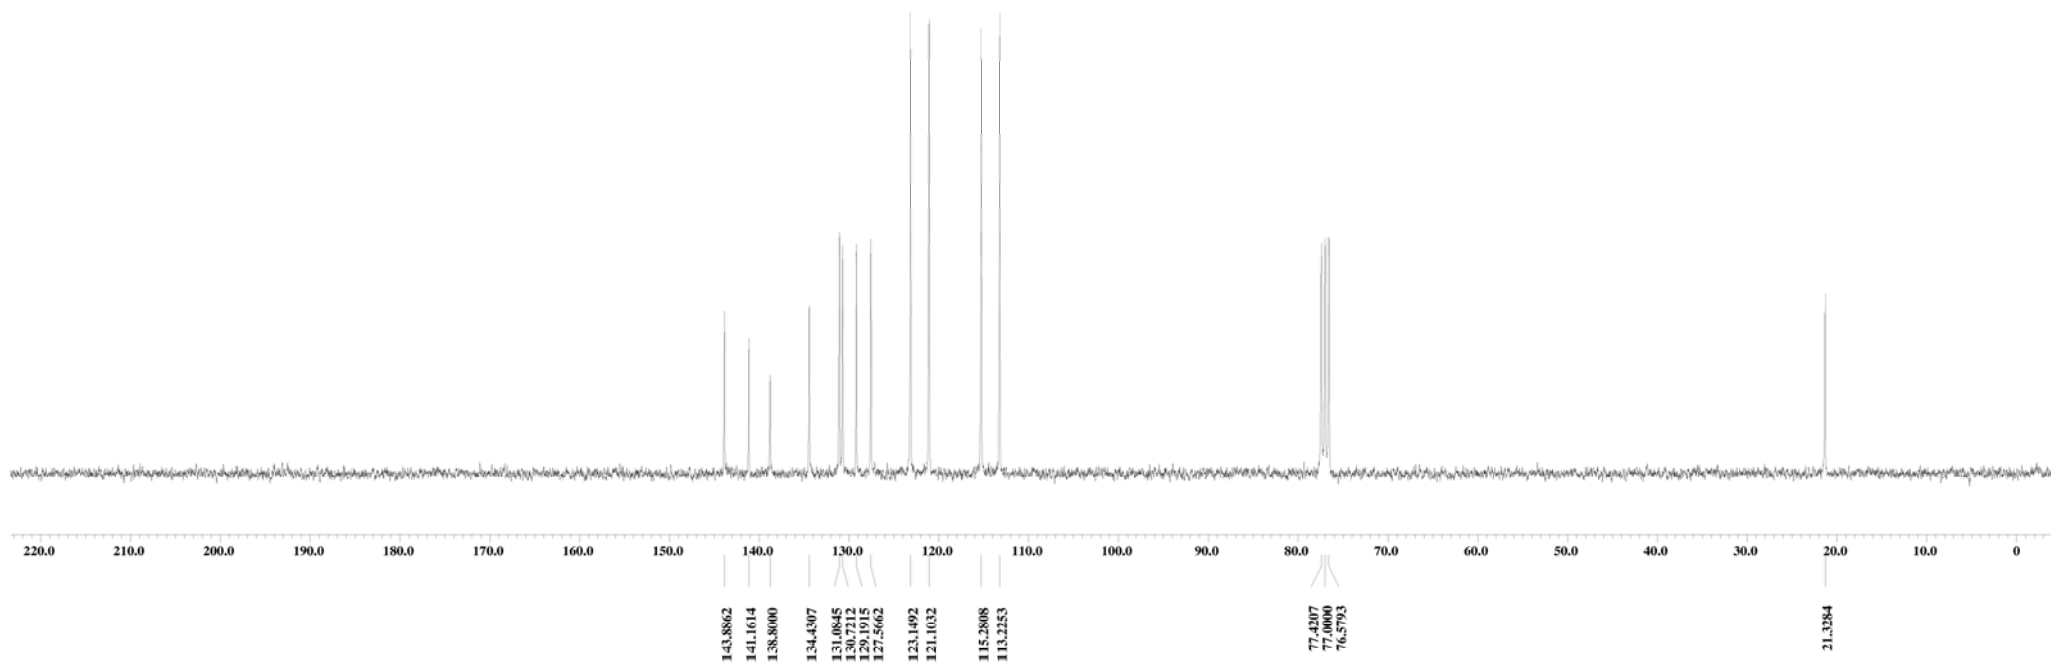

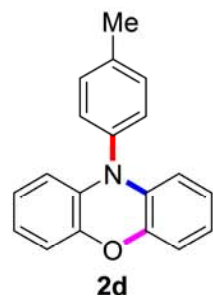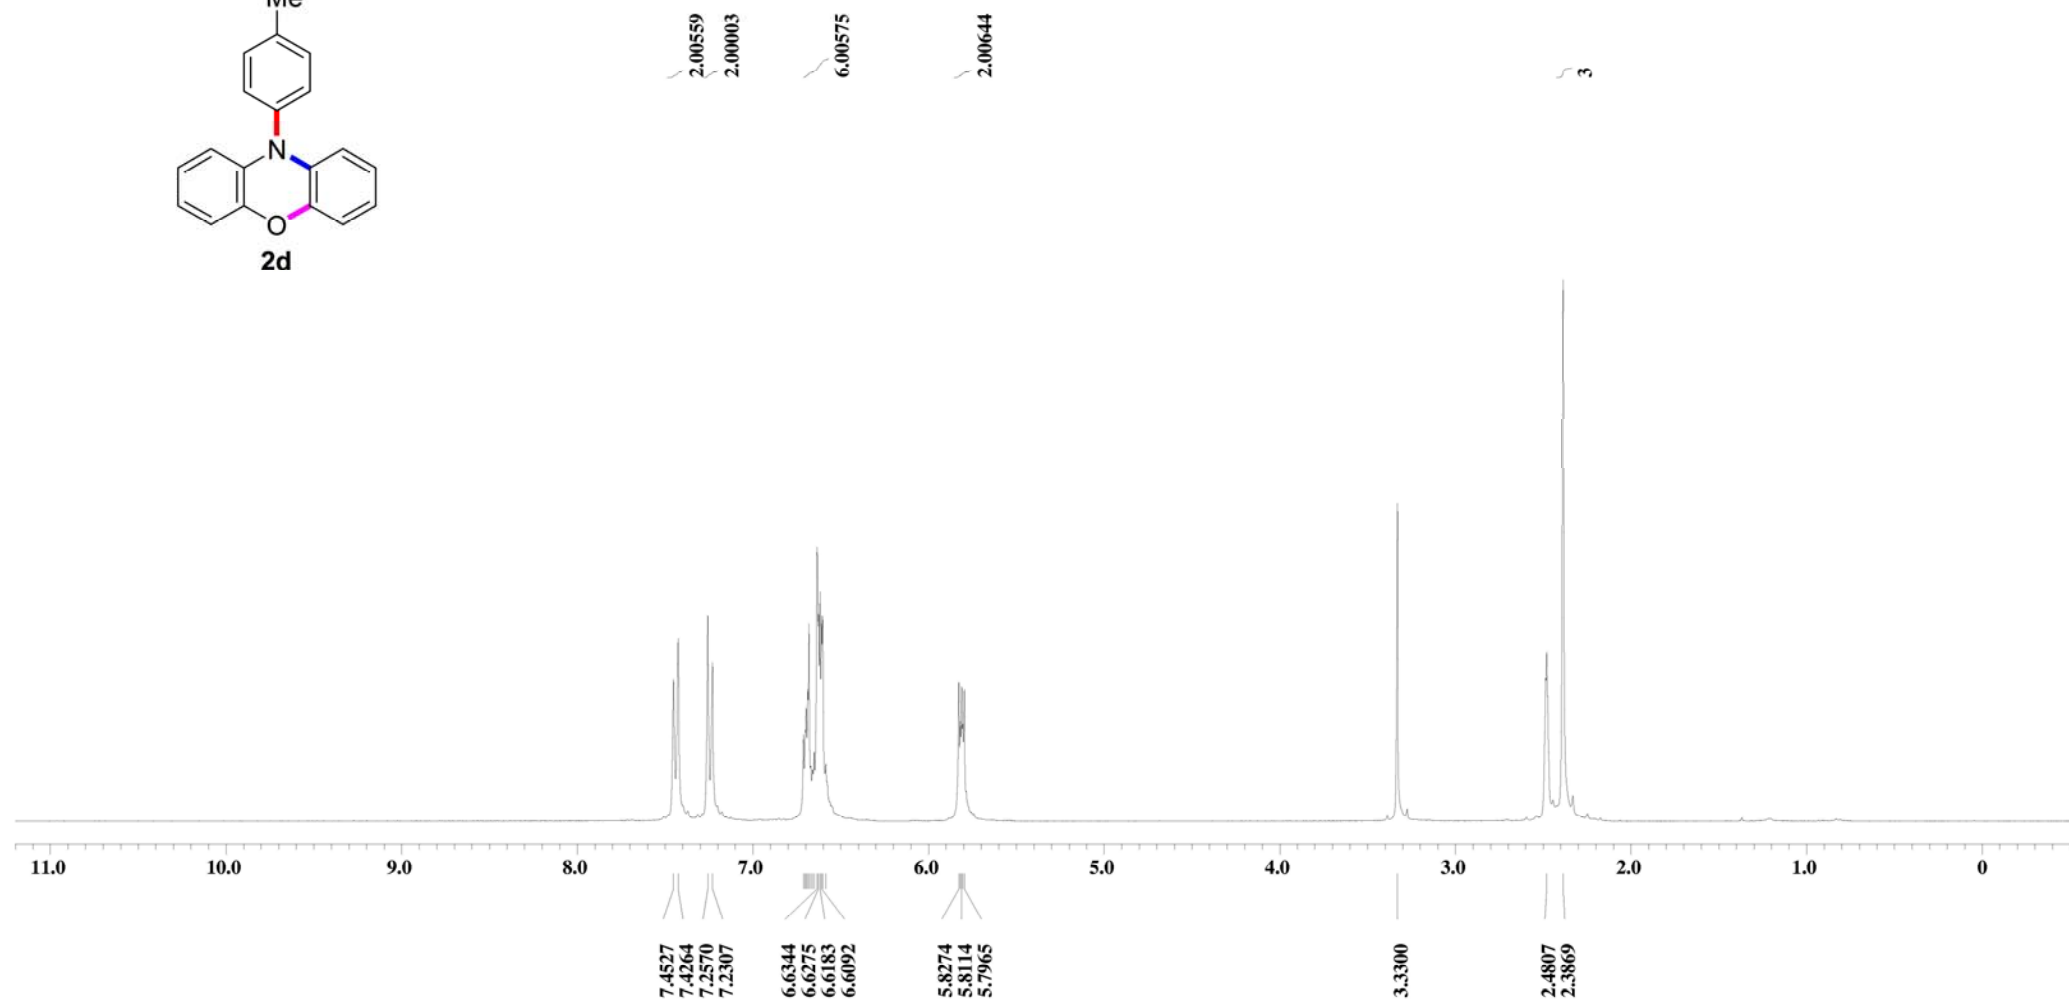

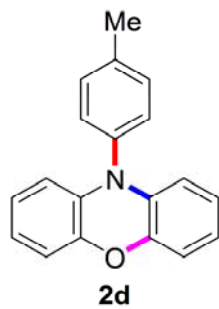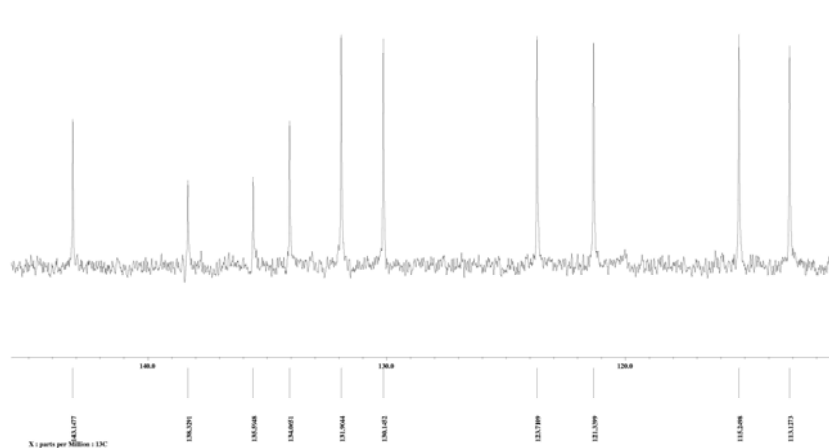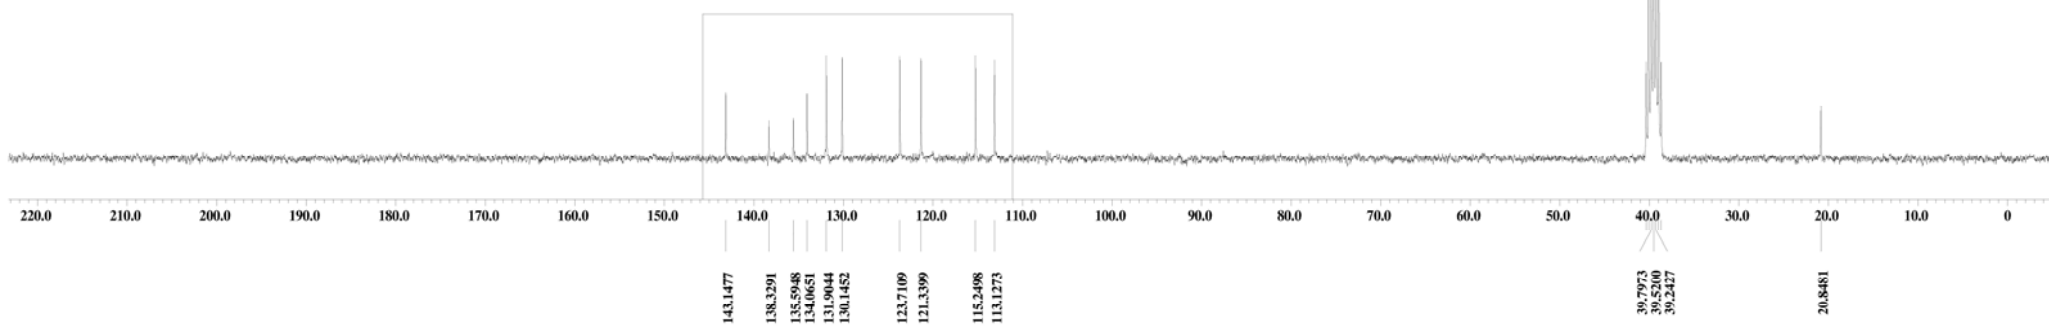

X : parts per Million : 13C

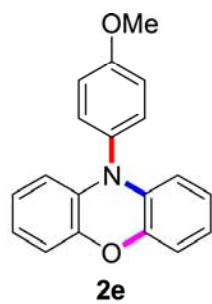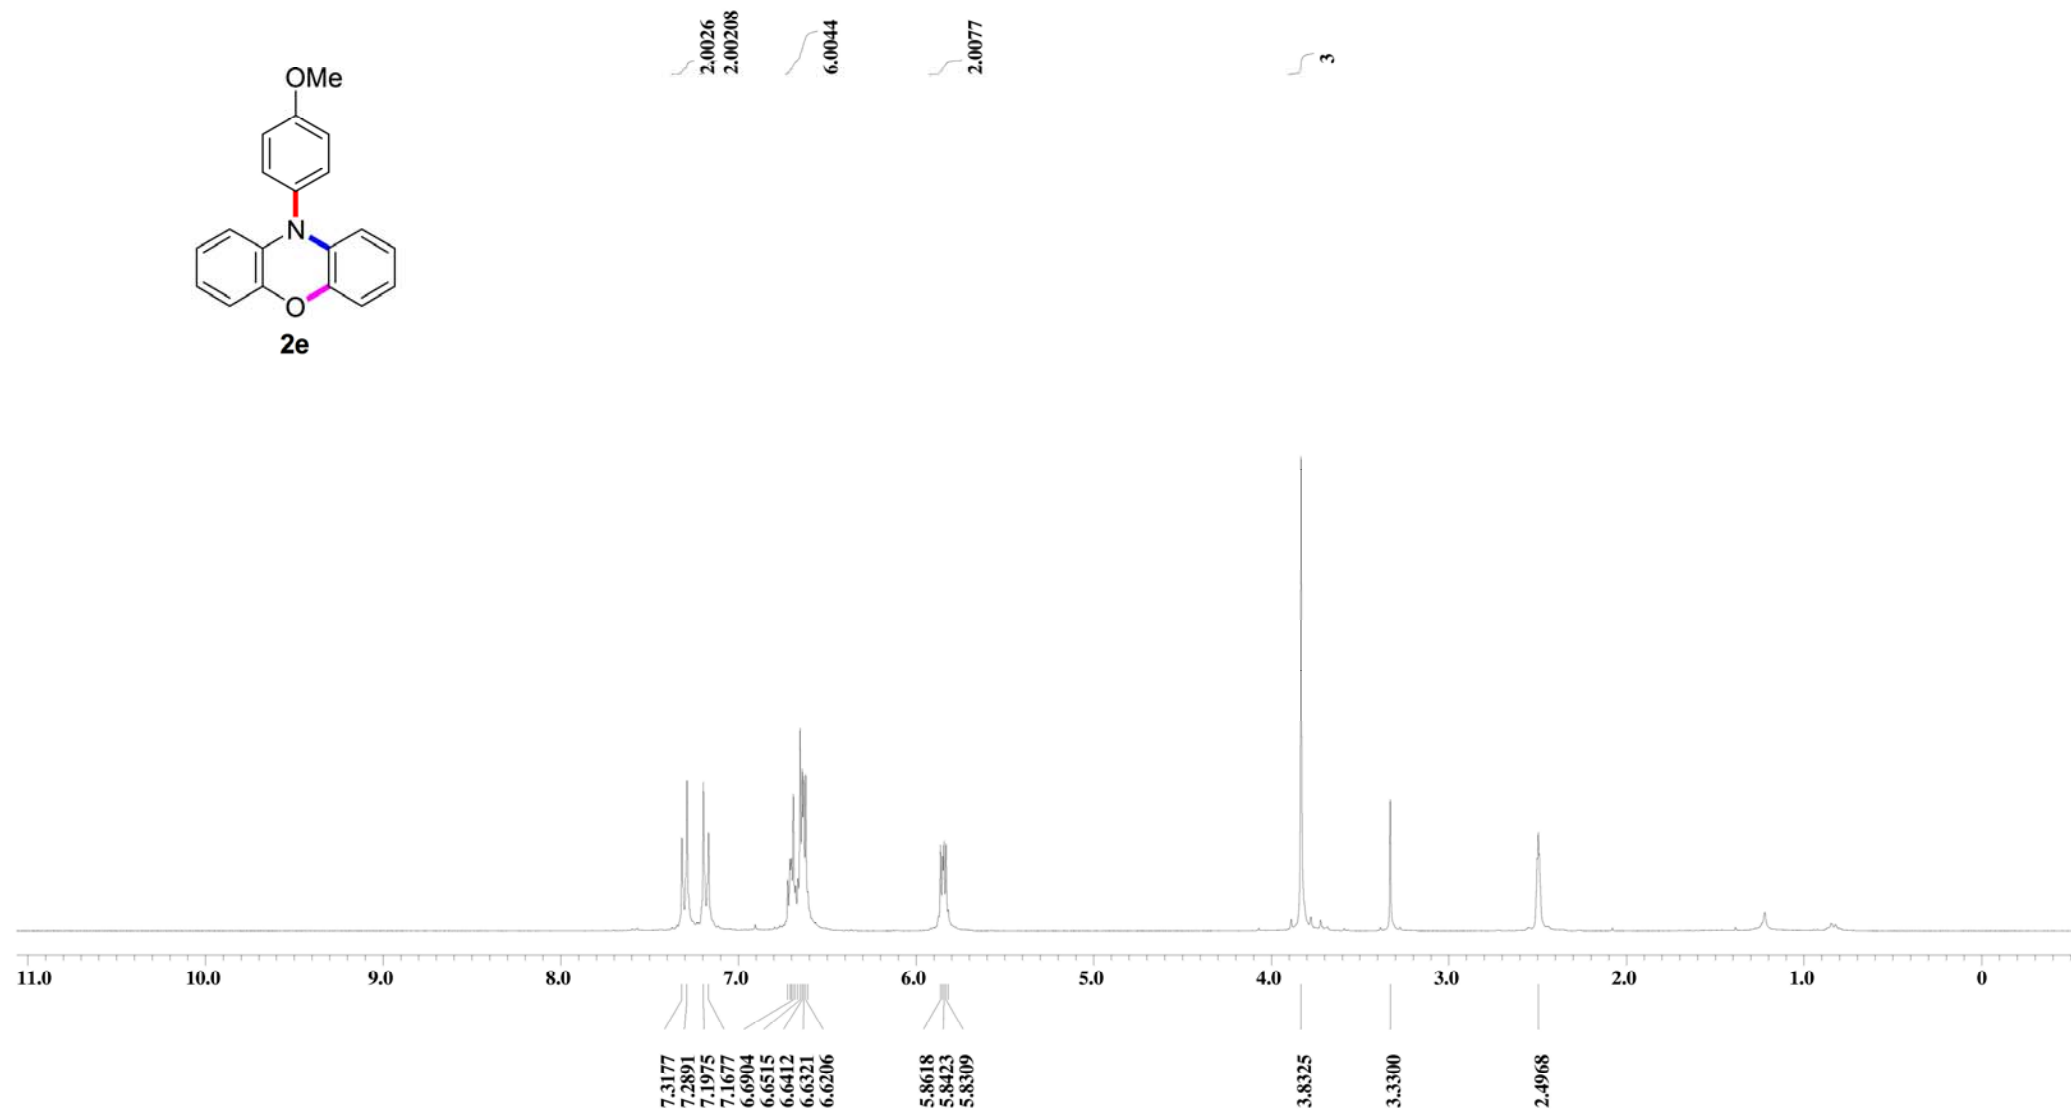

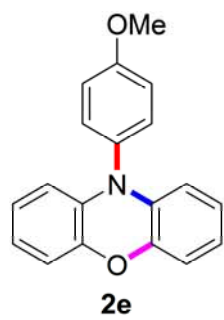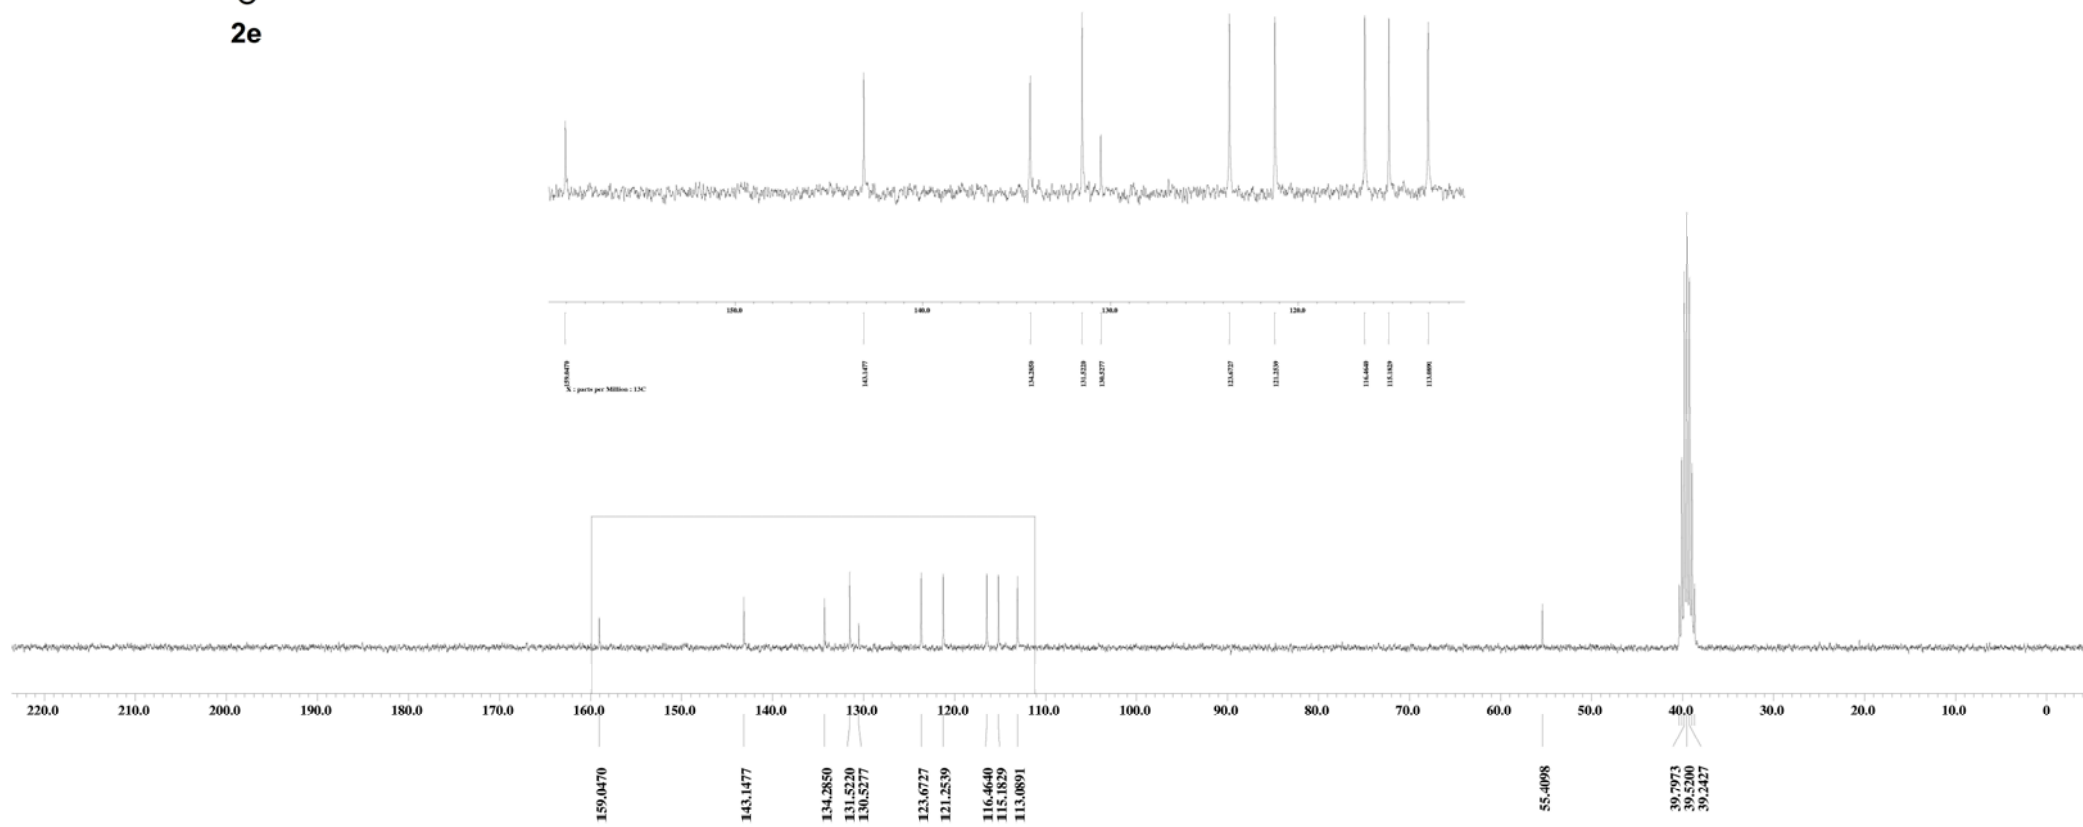

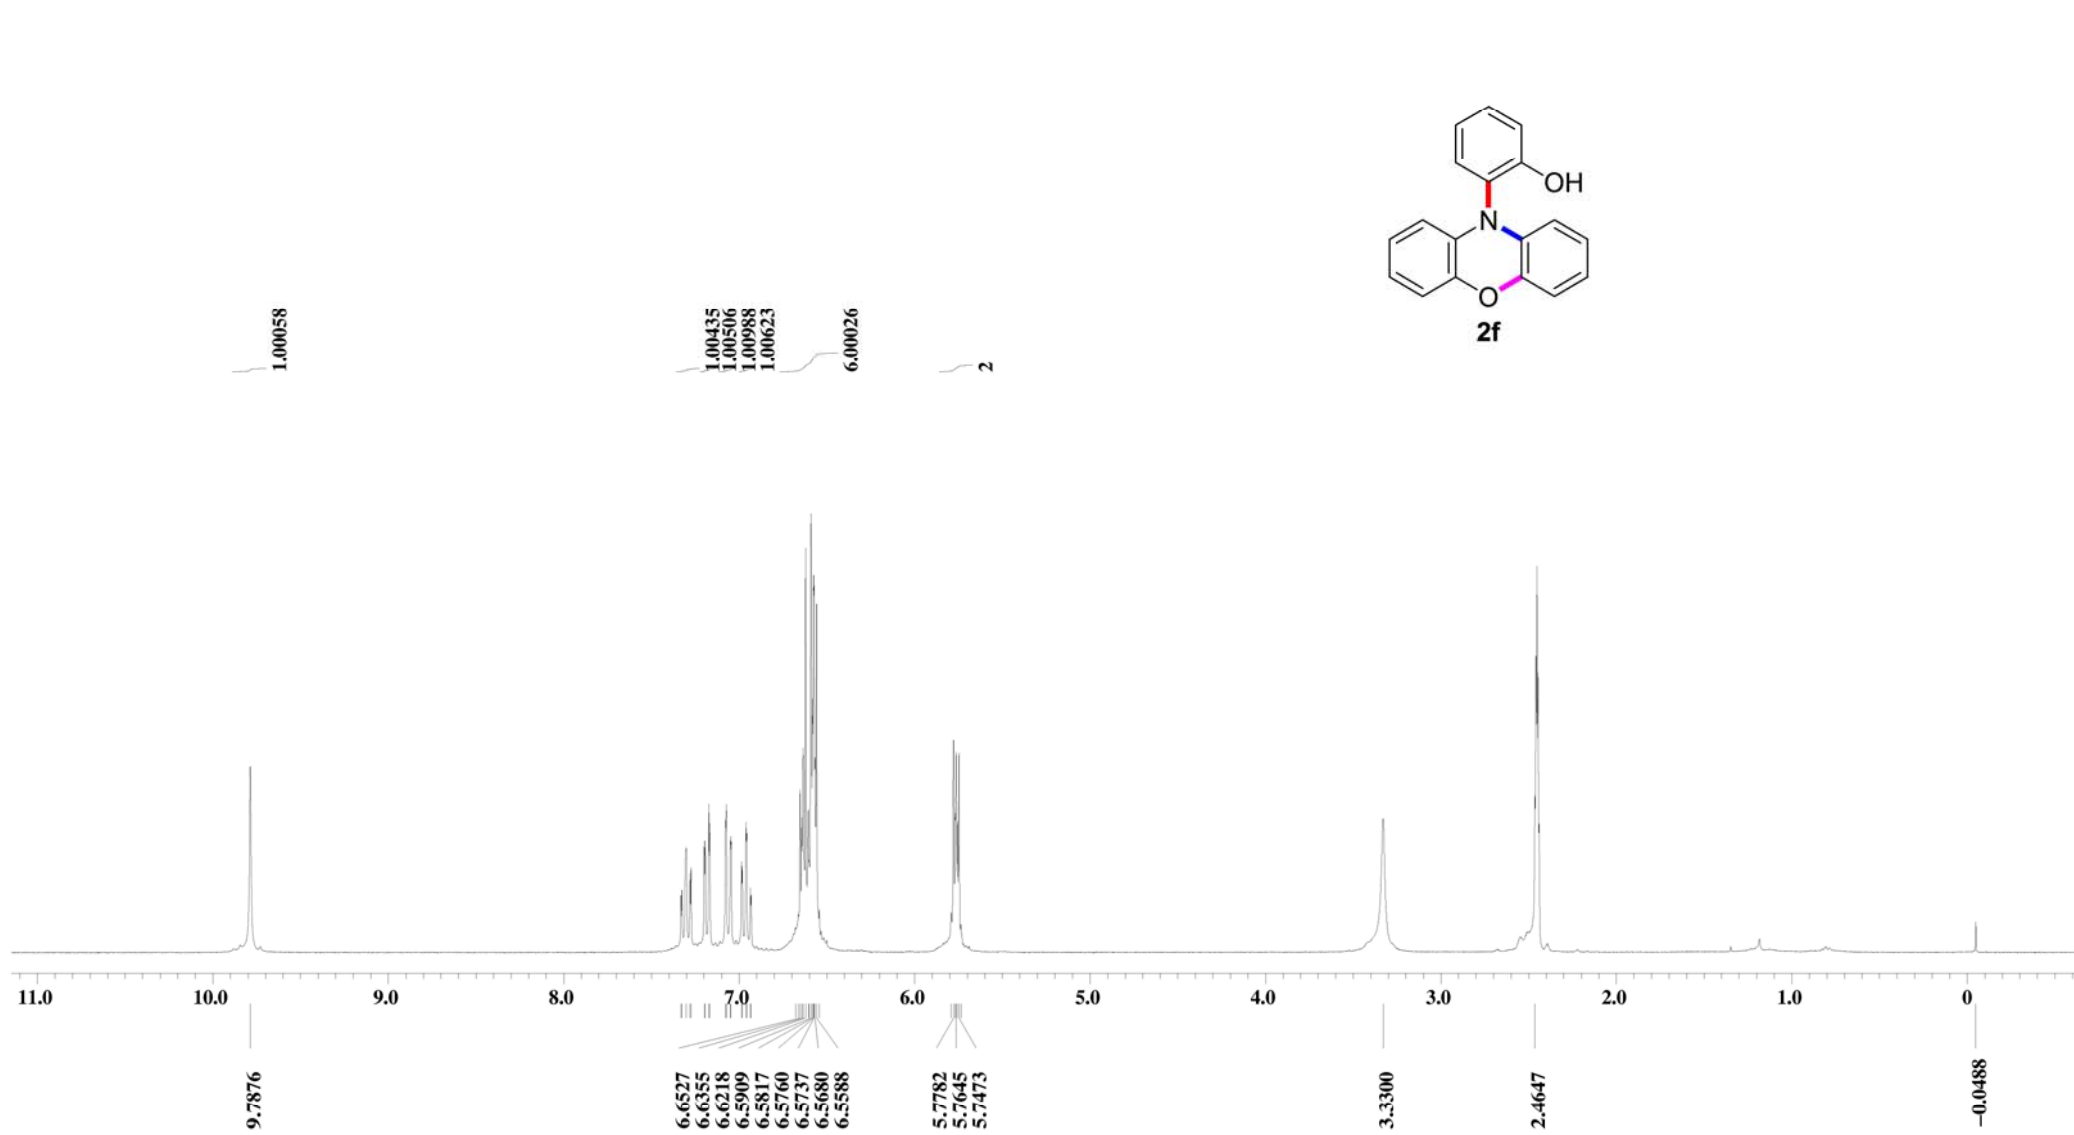

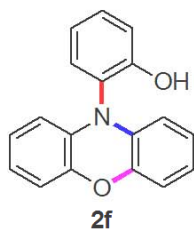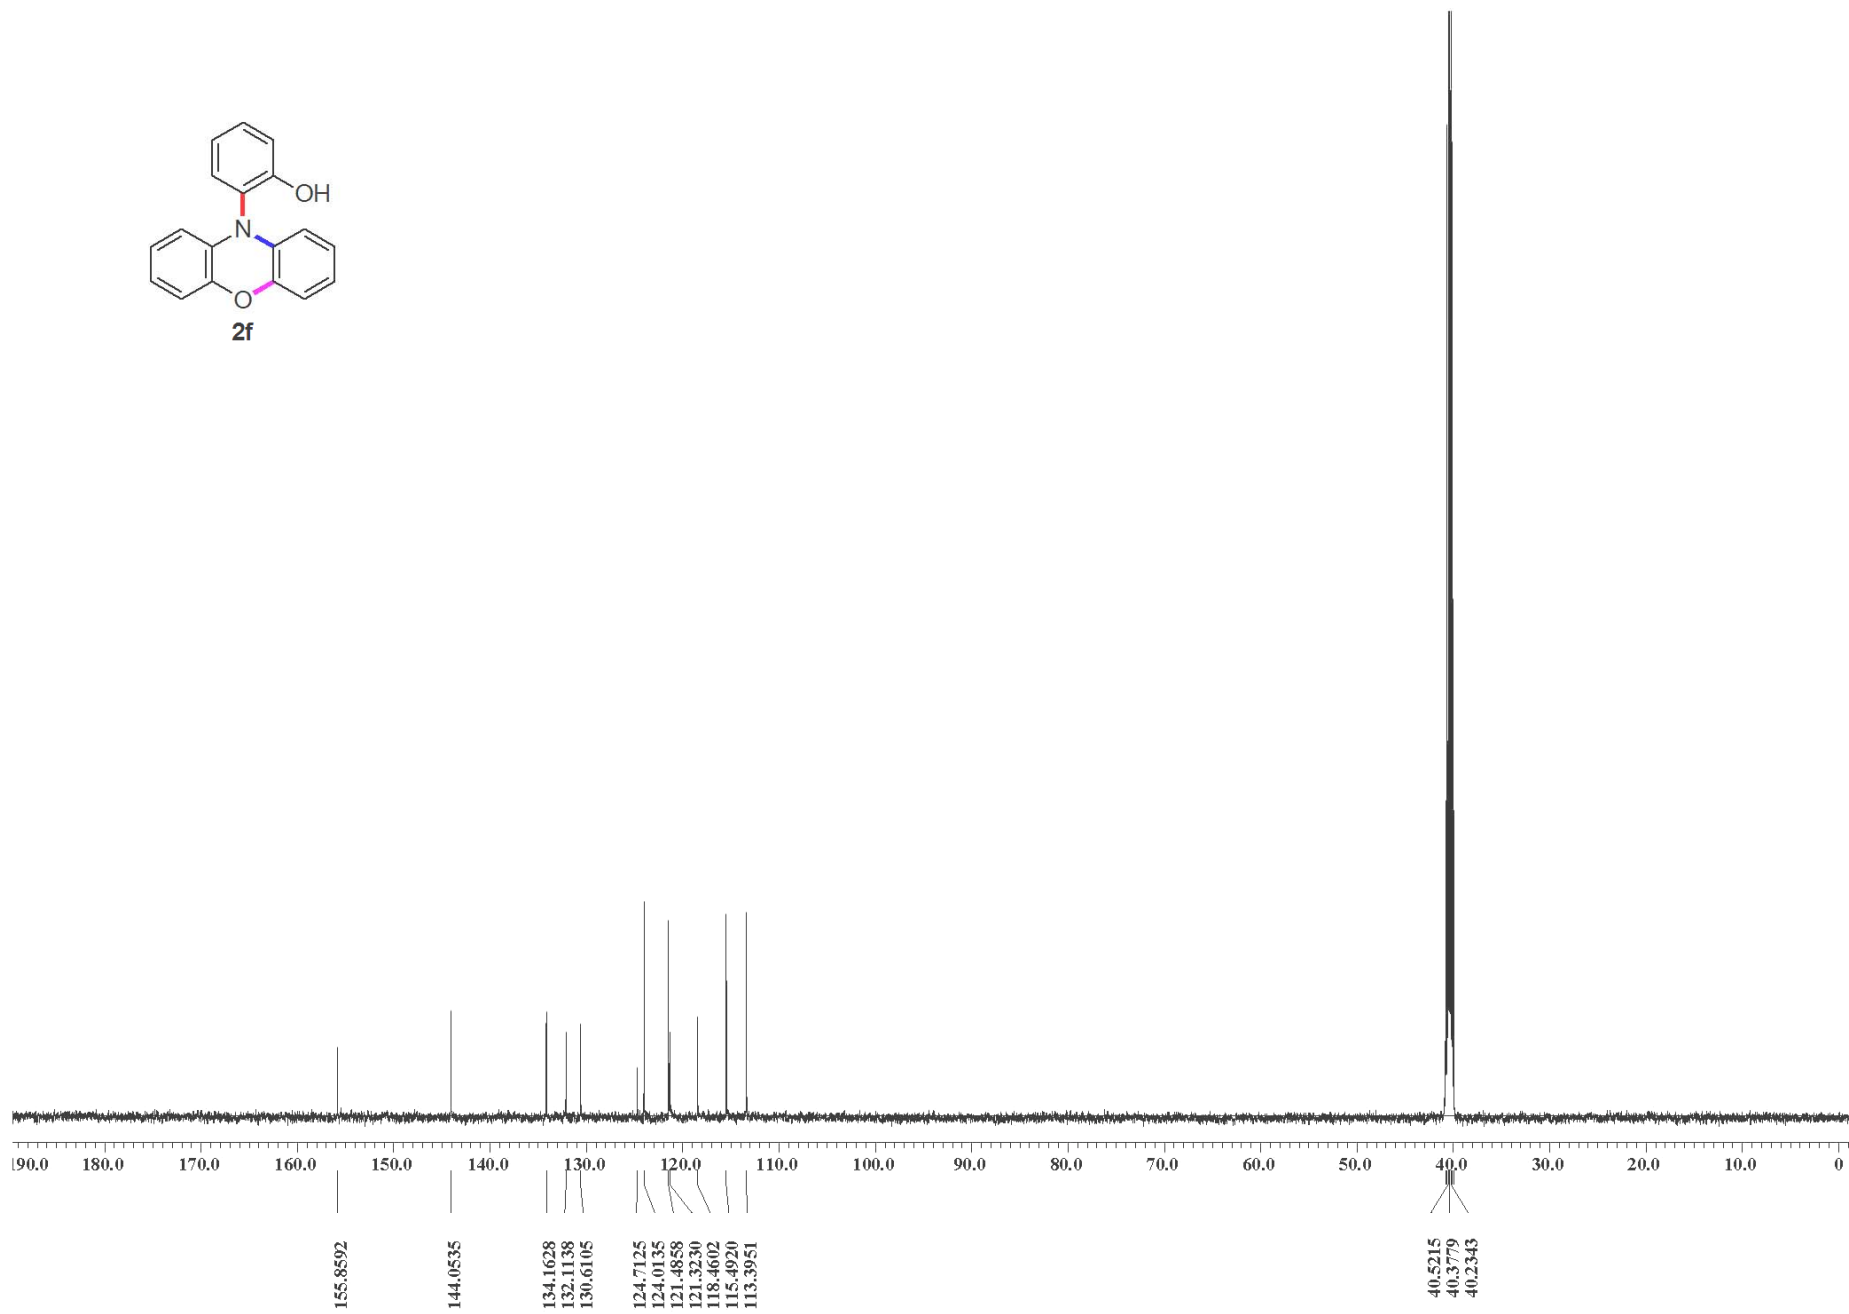

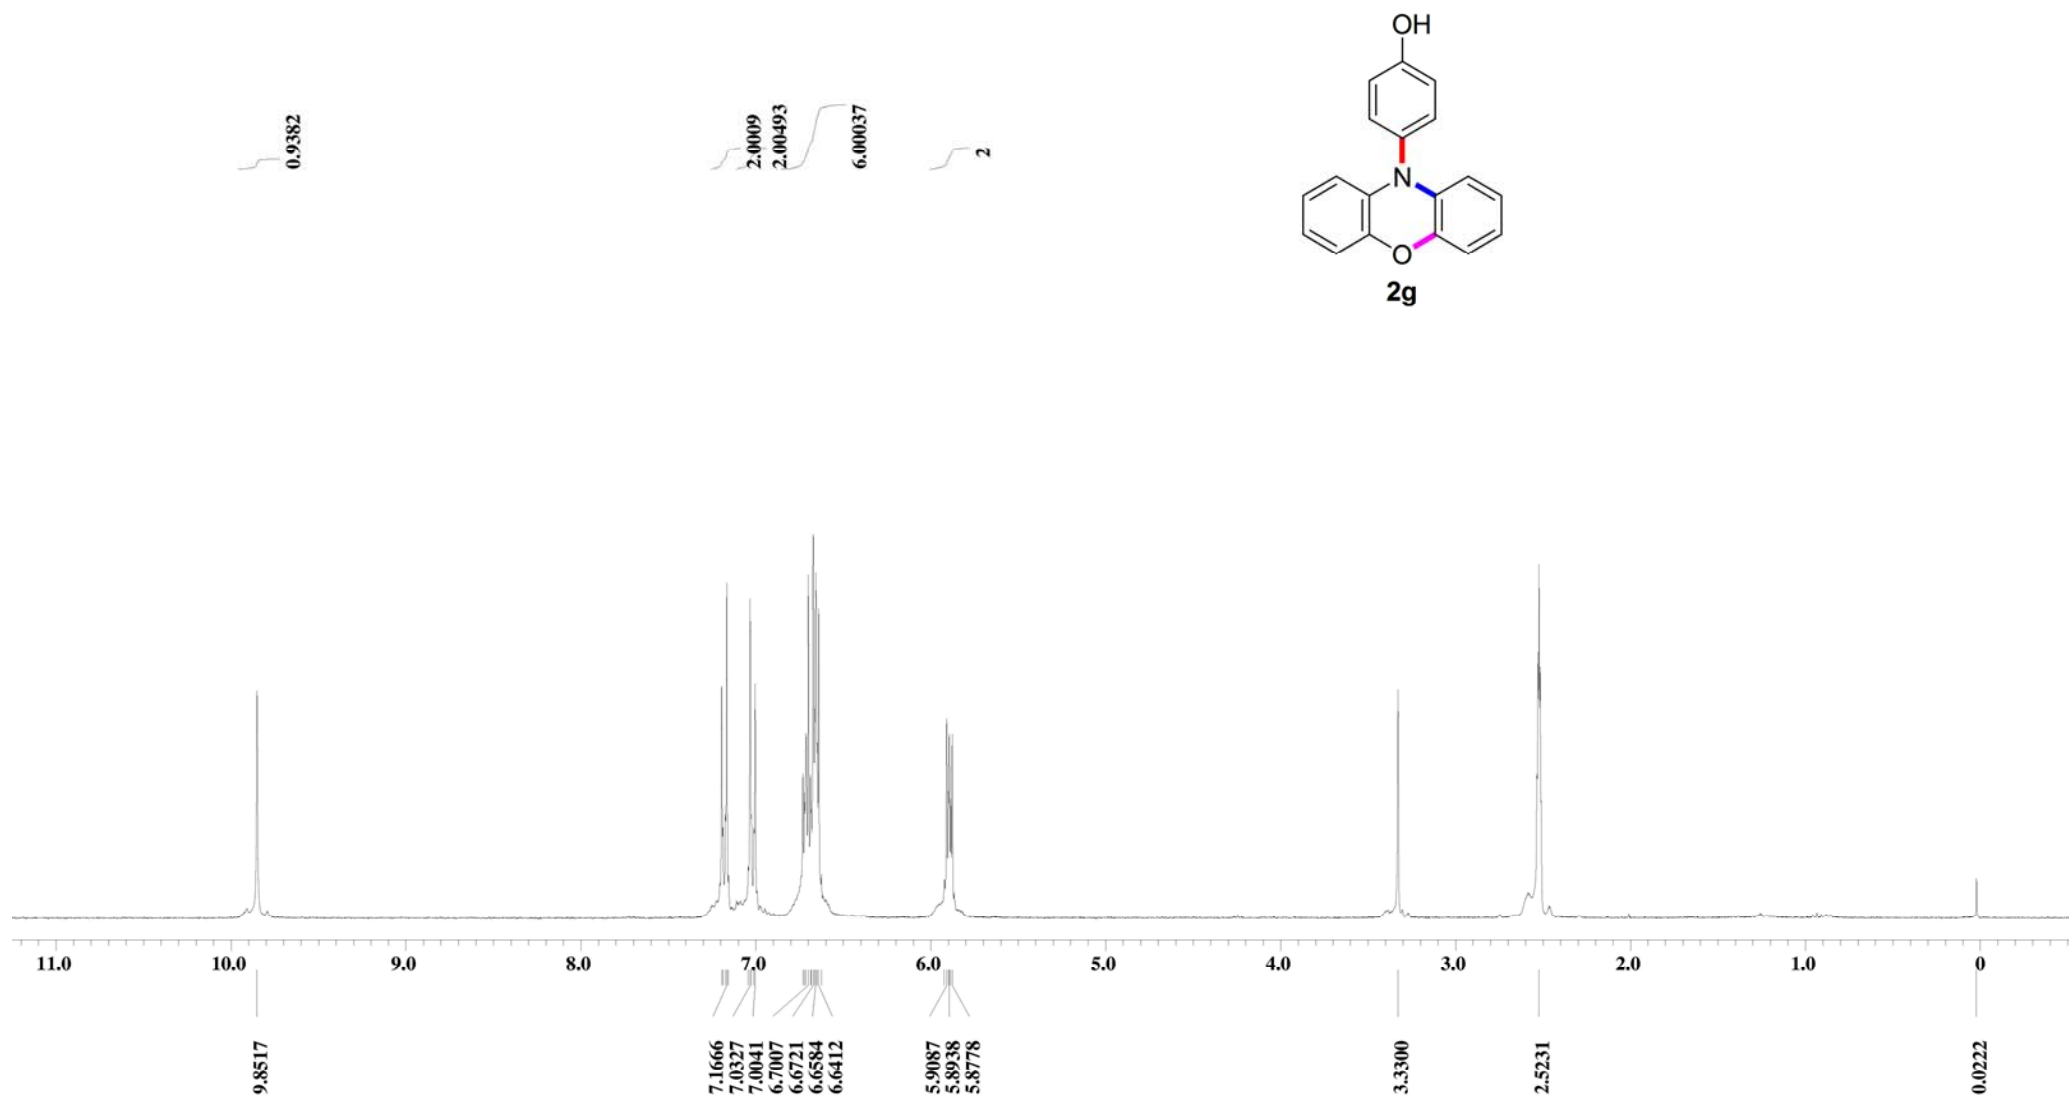



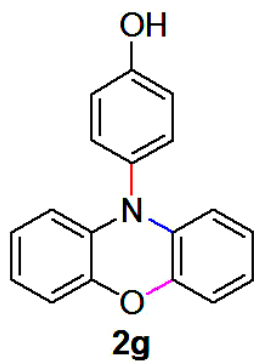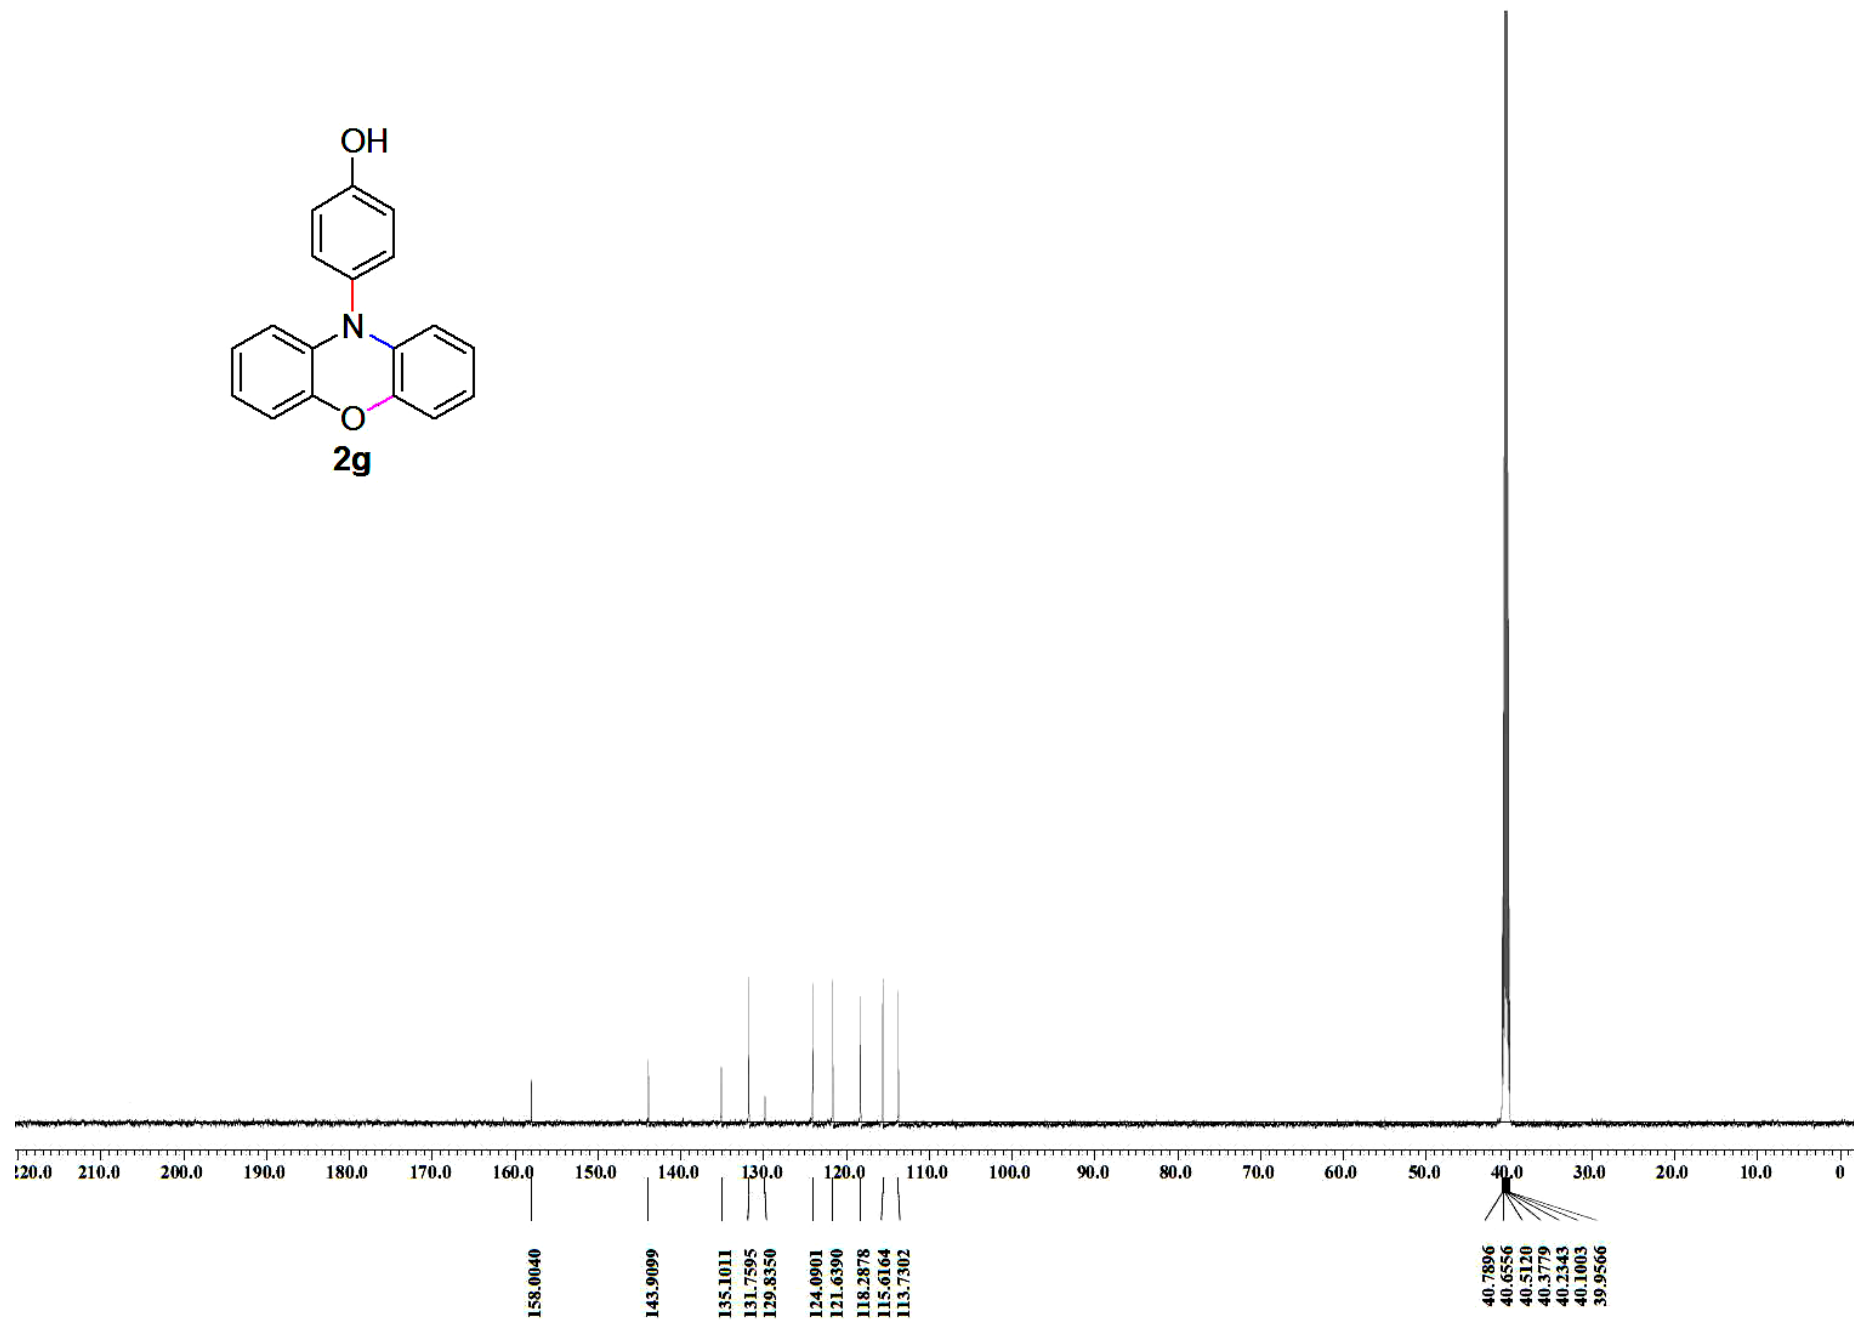

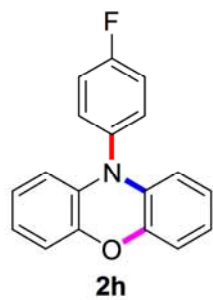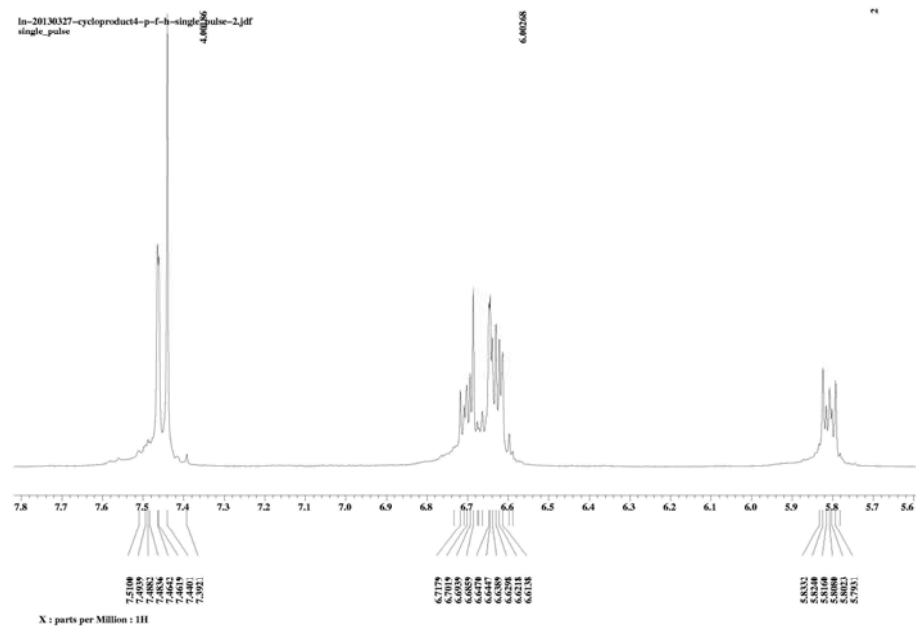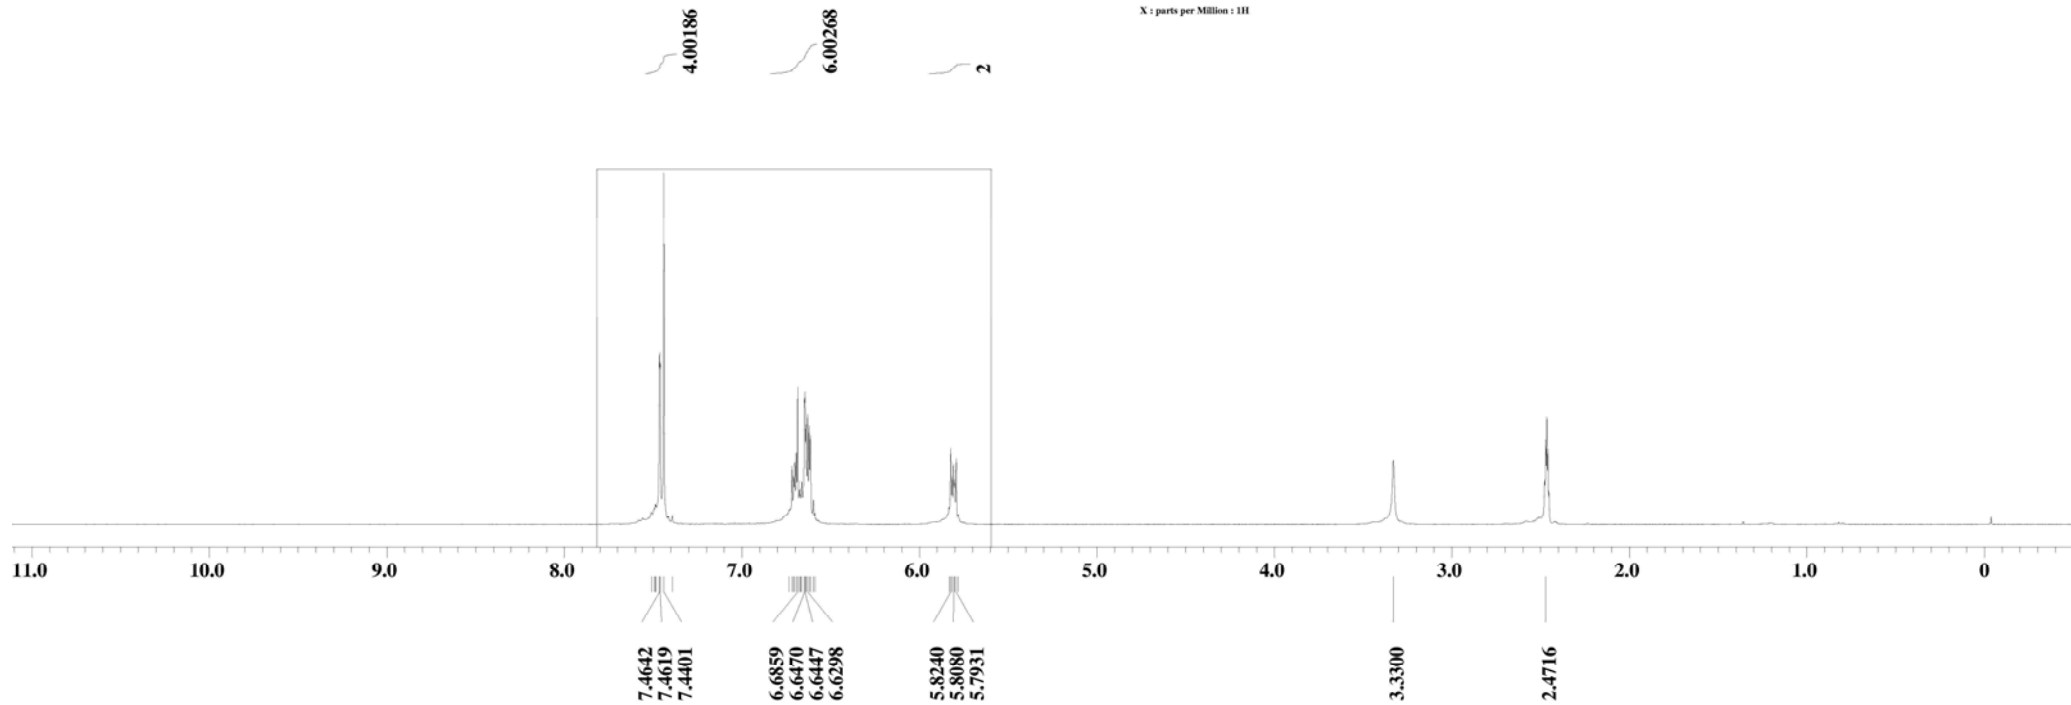

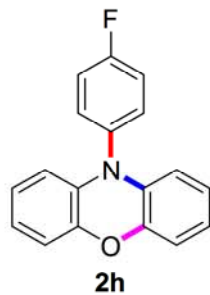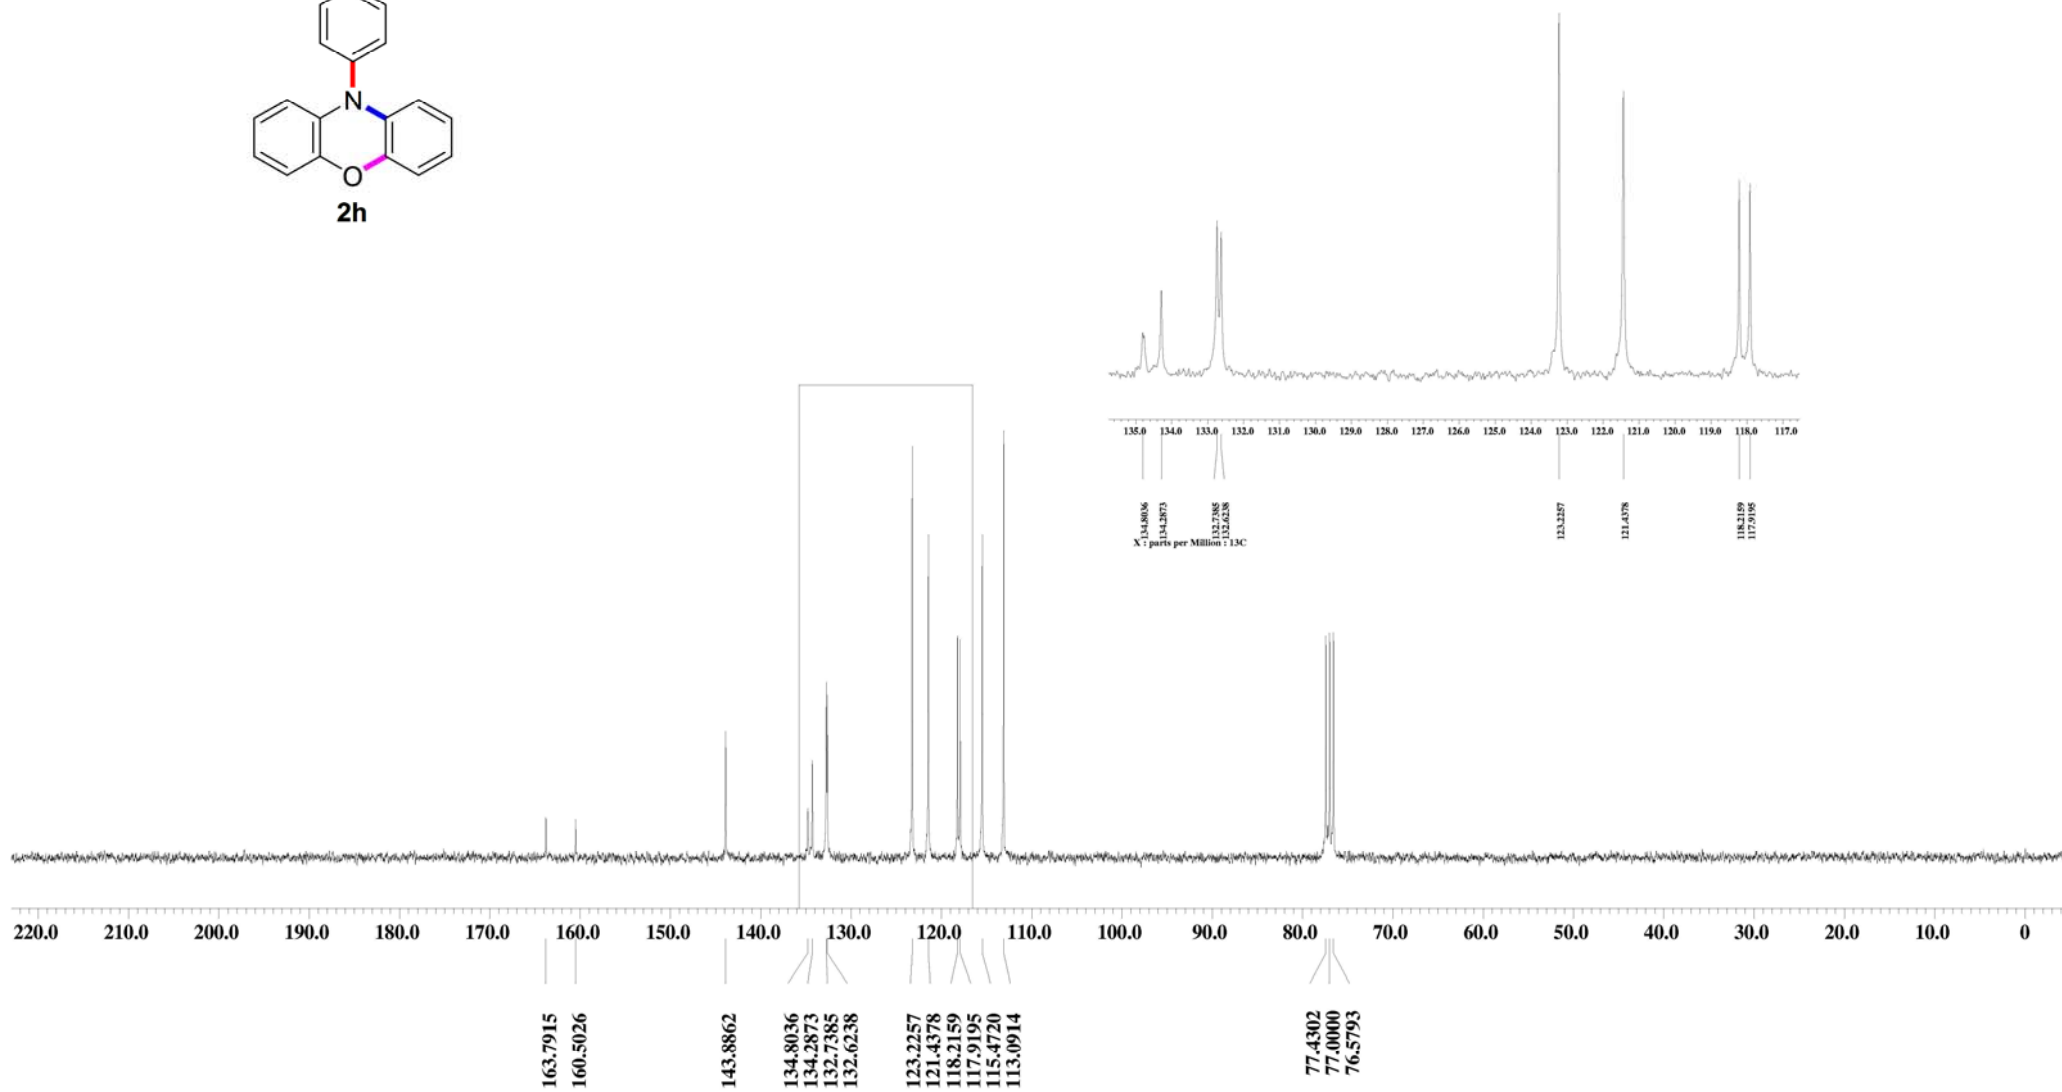

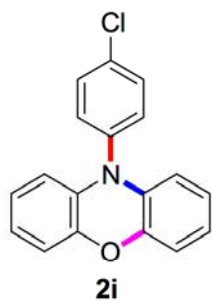

2 2.00005  
6.00232  
2.00287

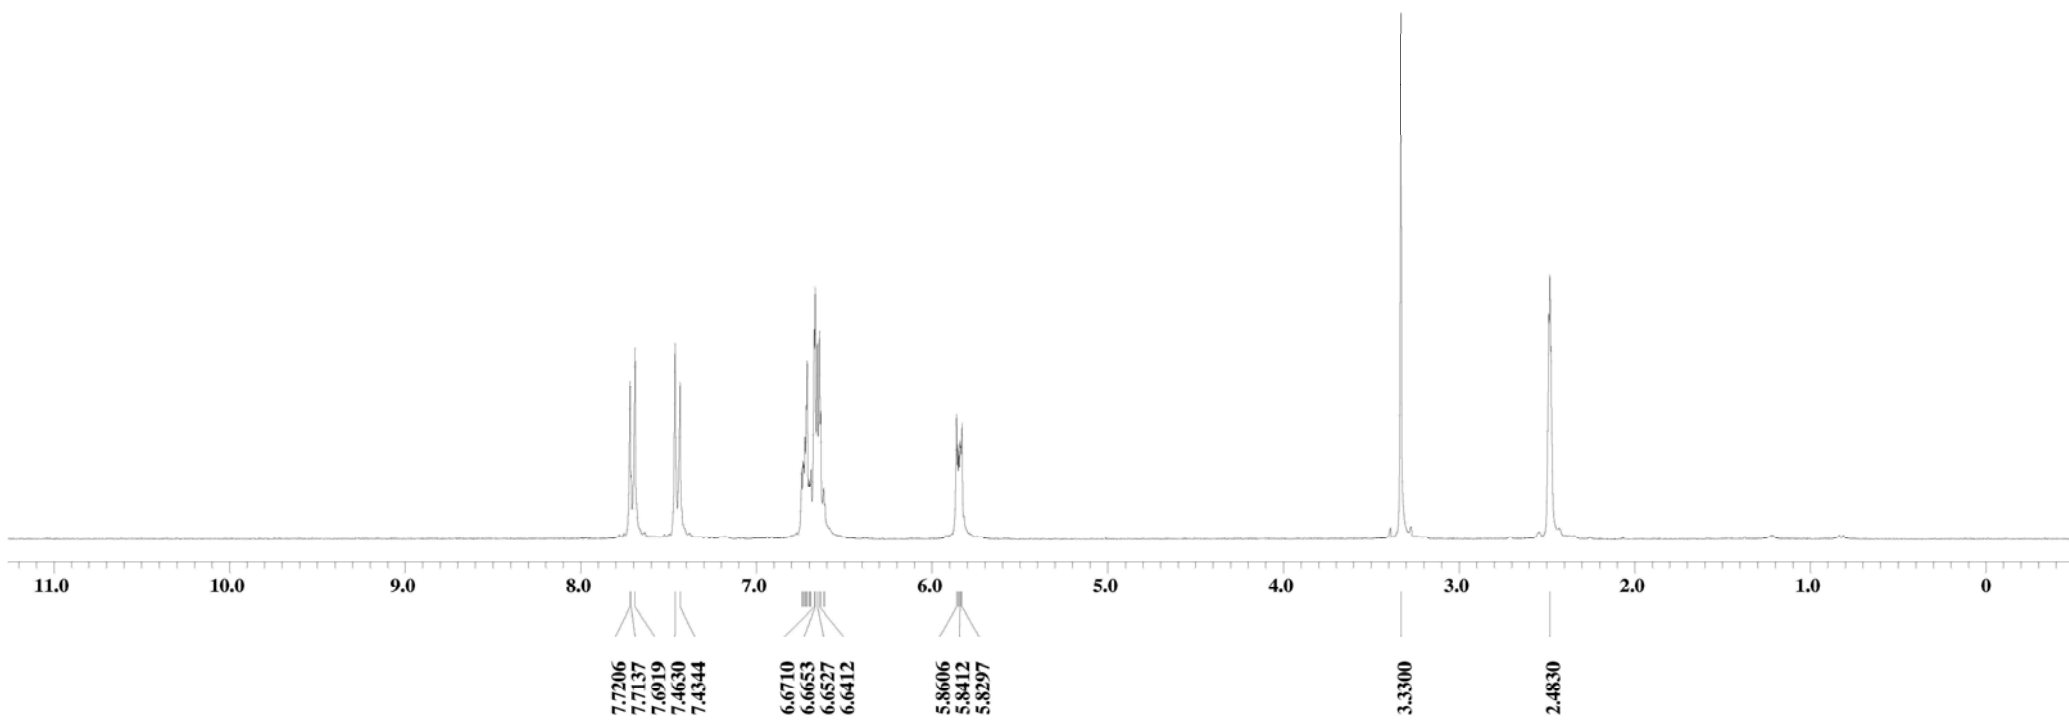

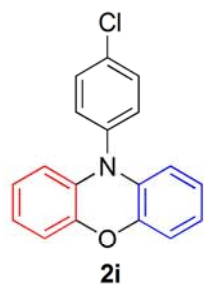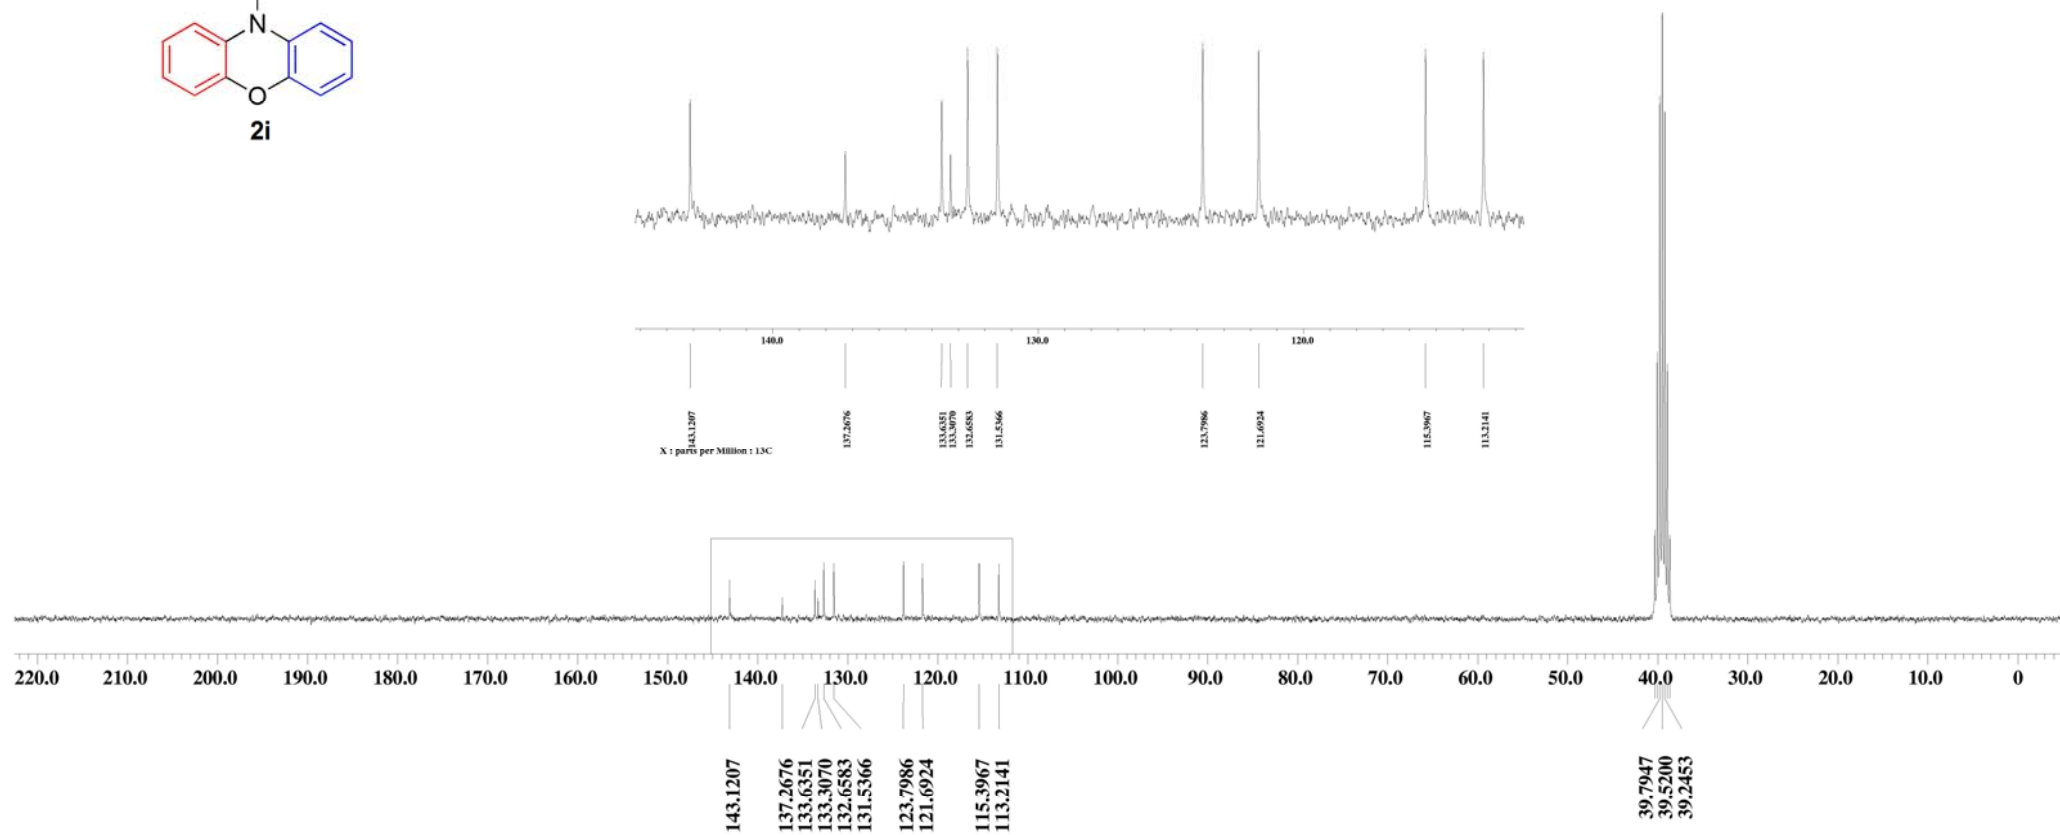



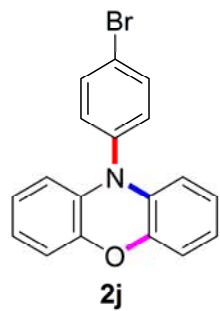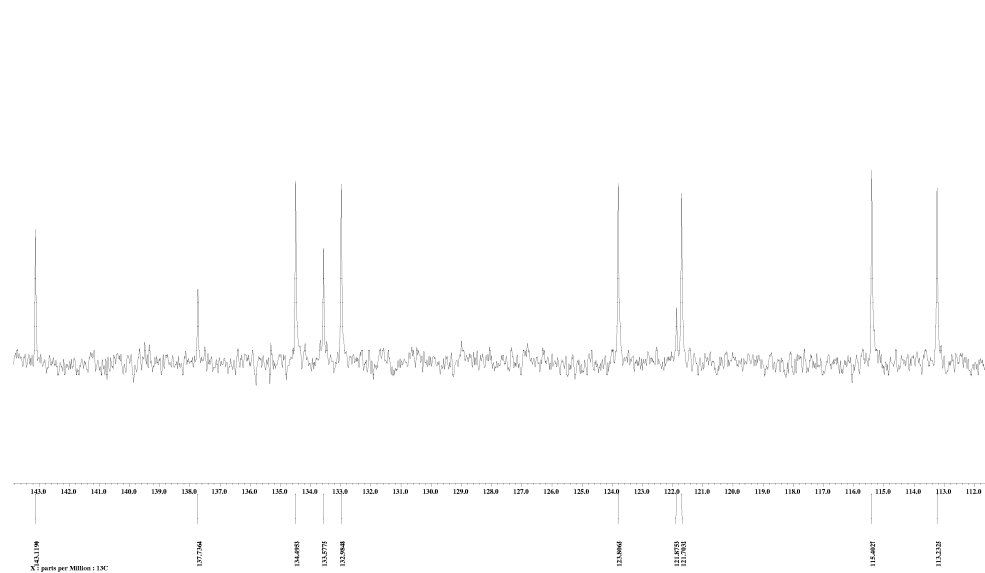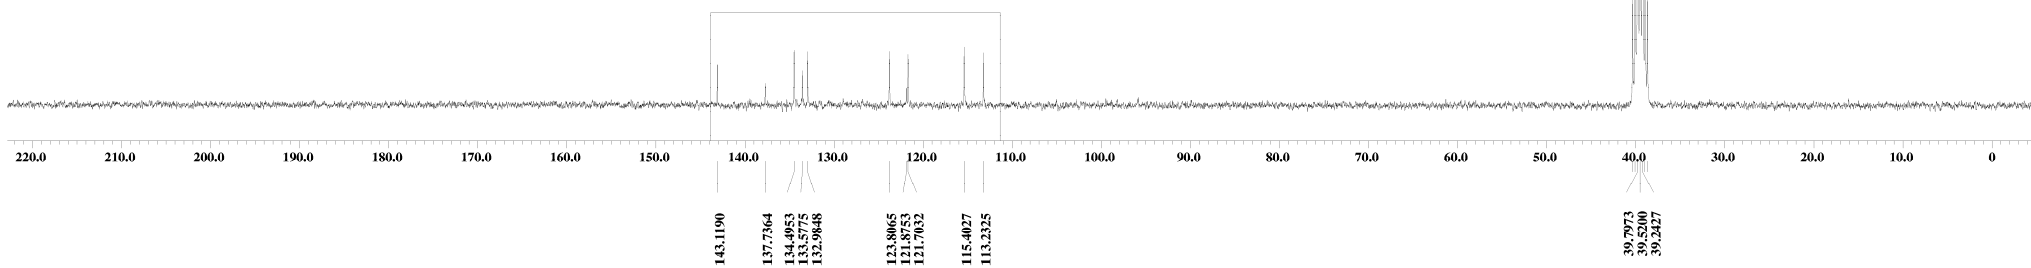

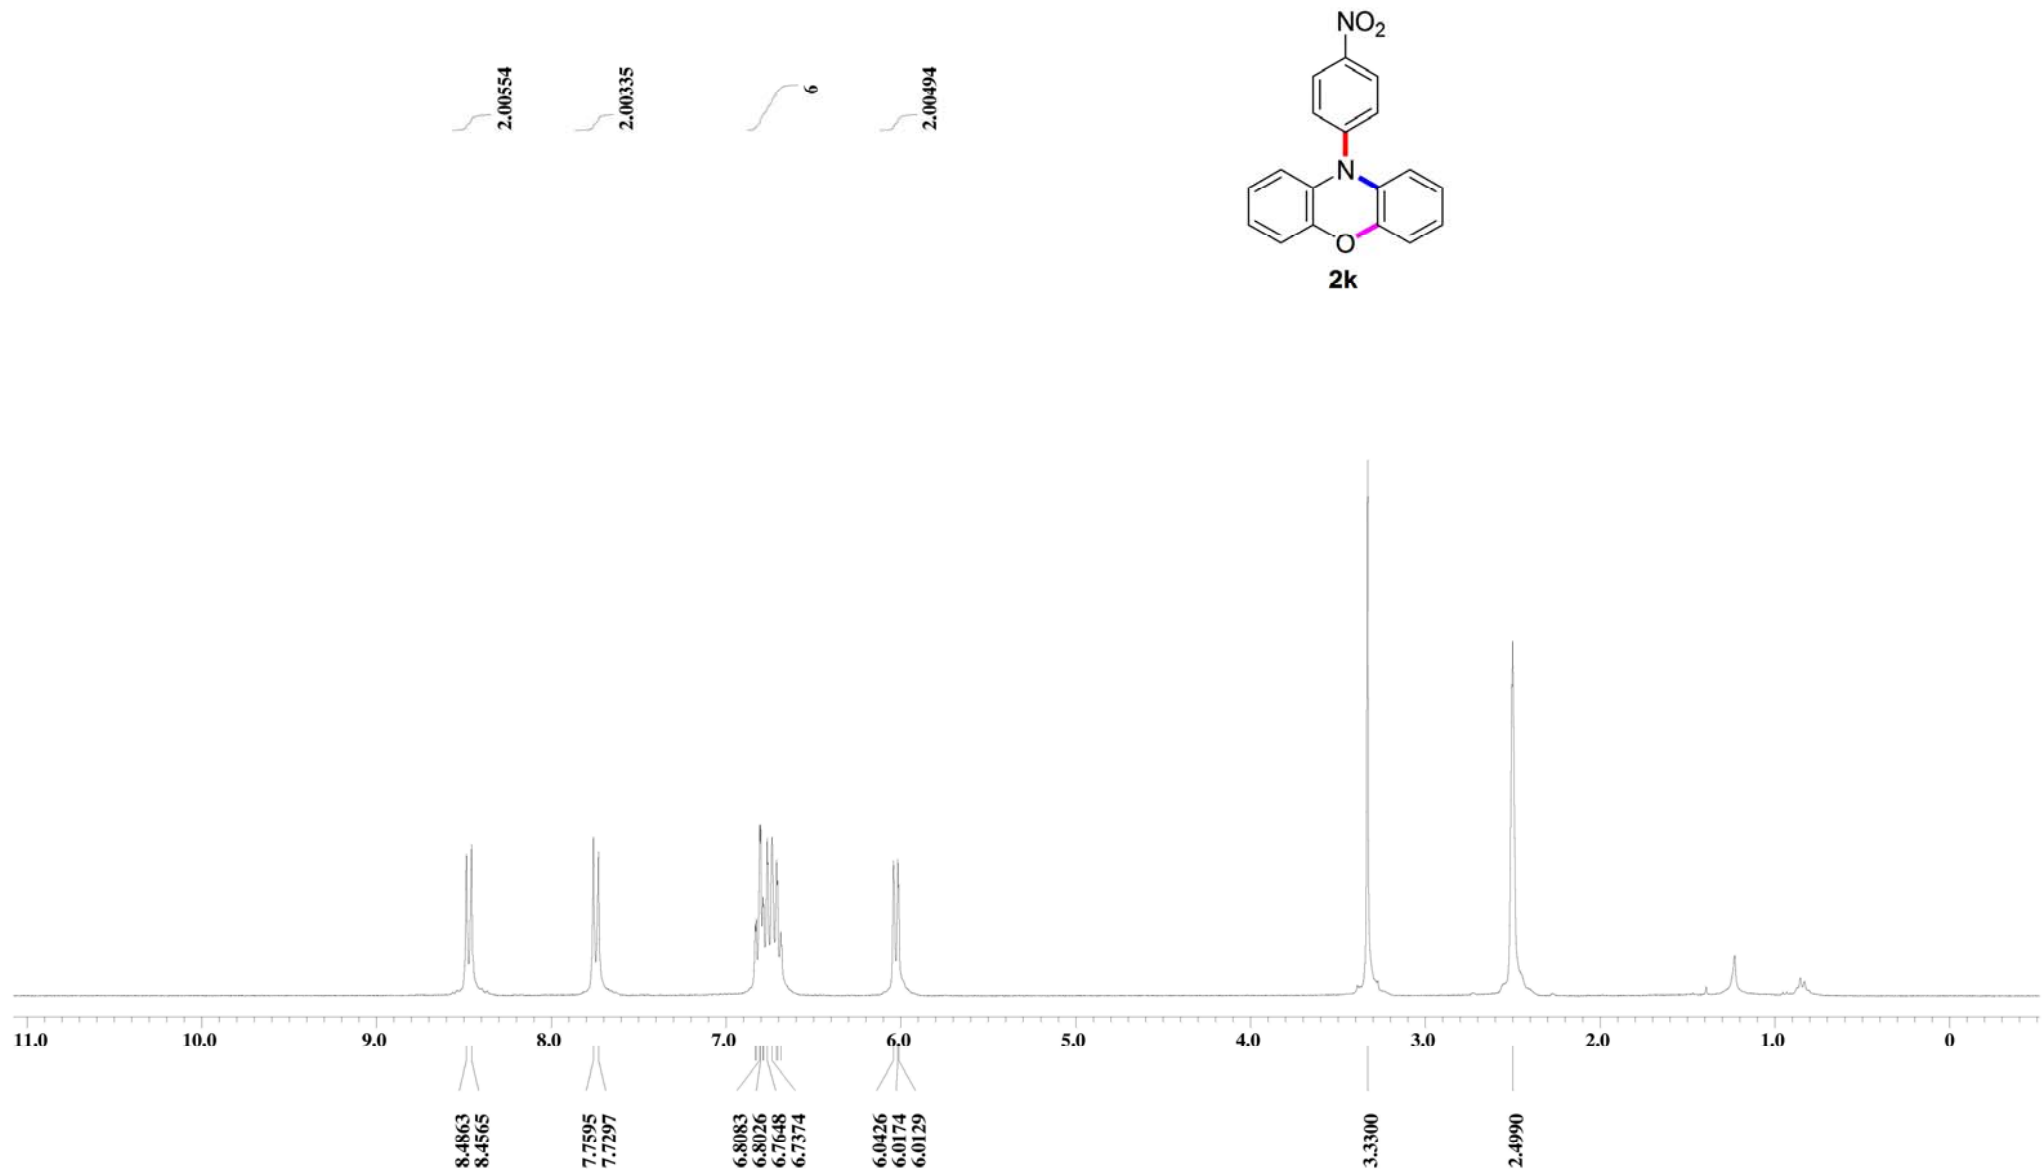



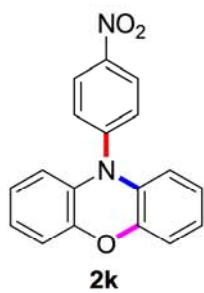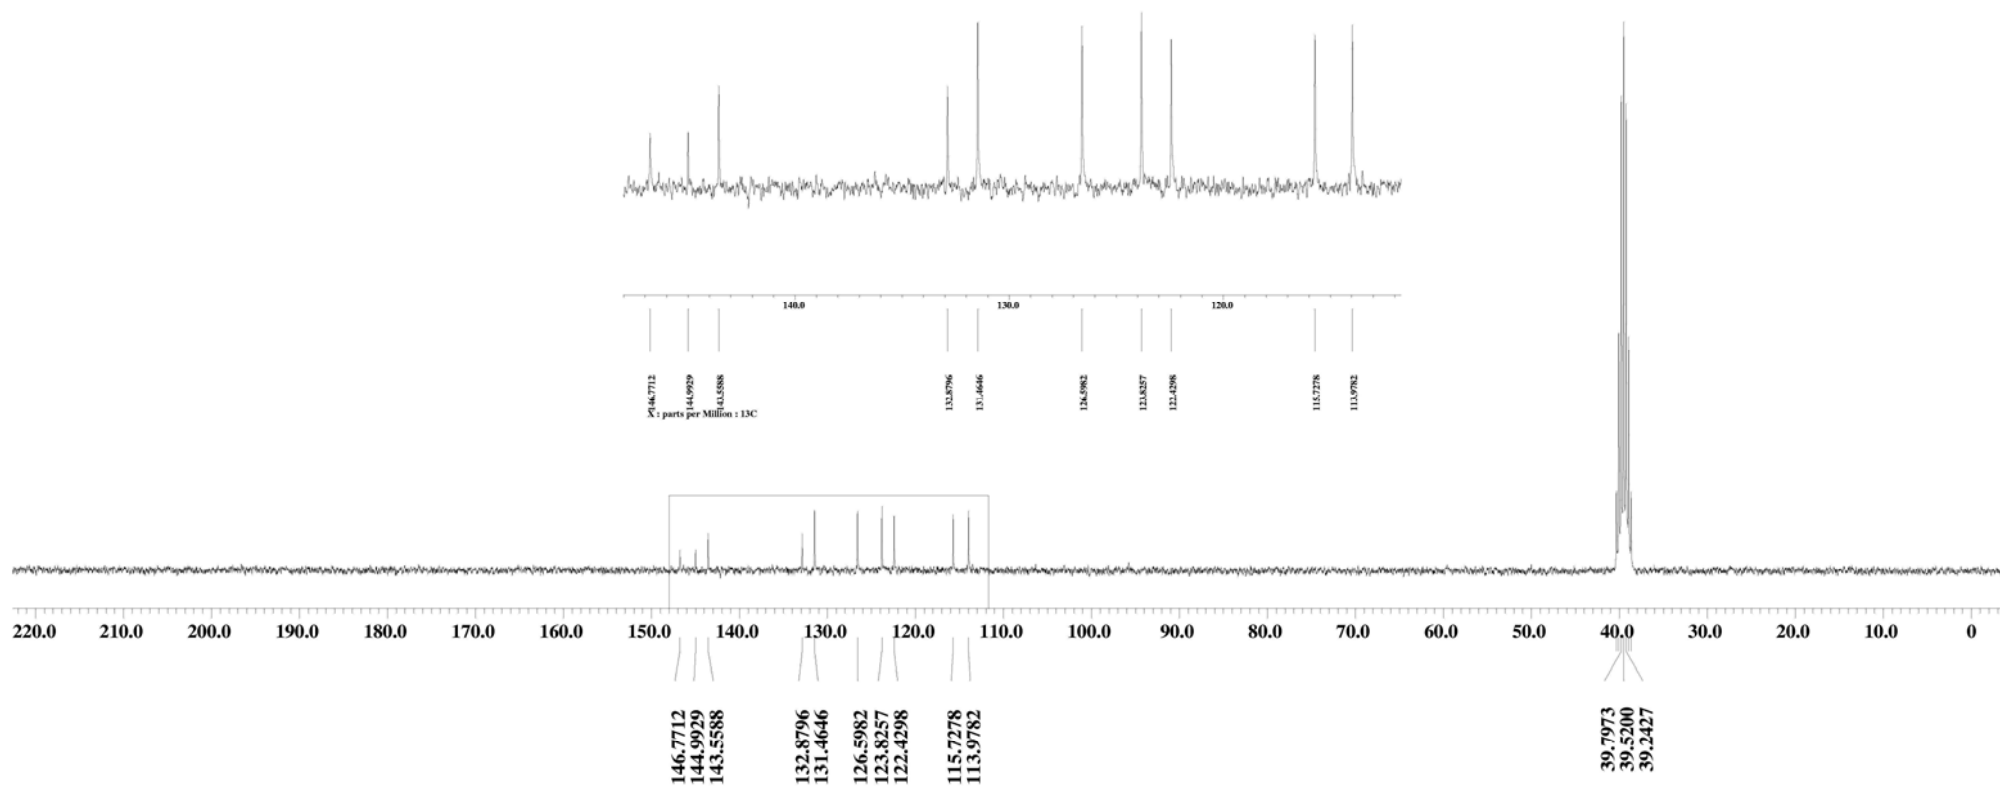

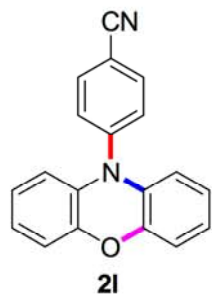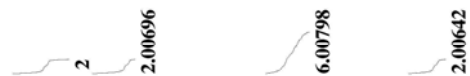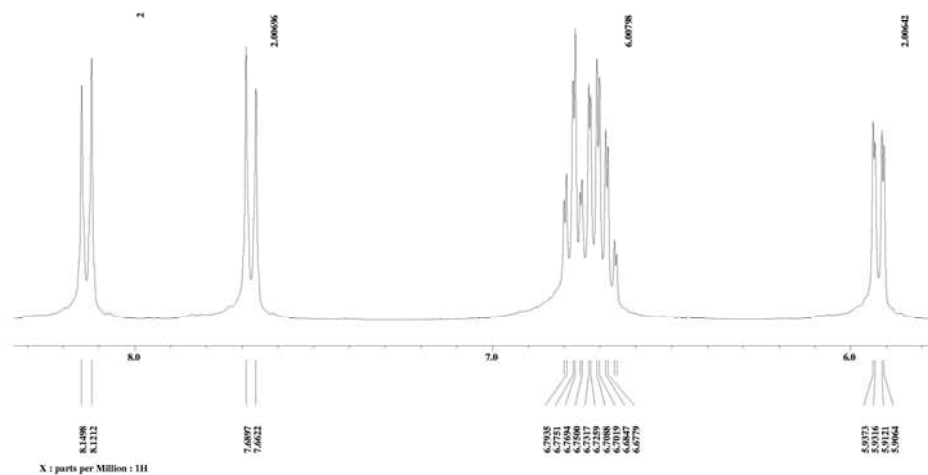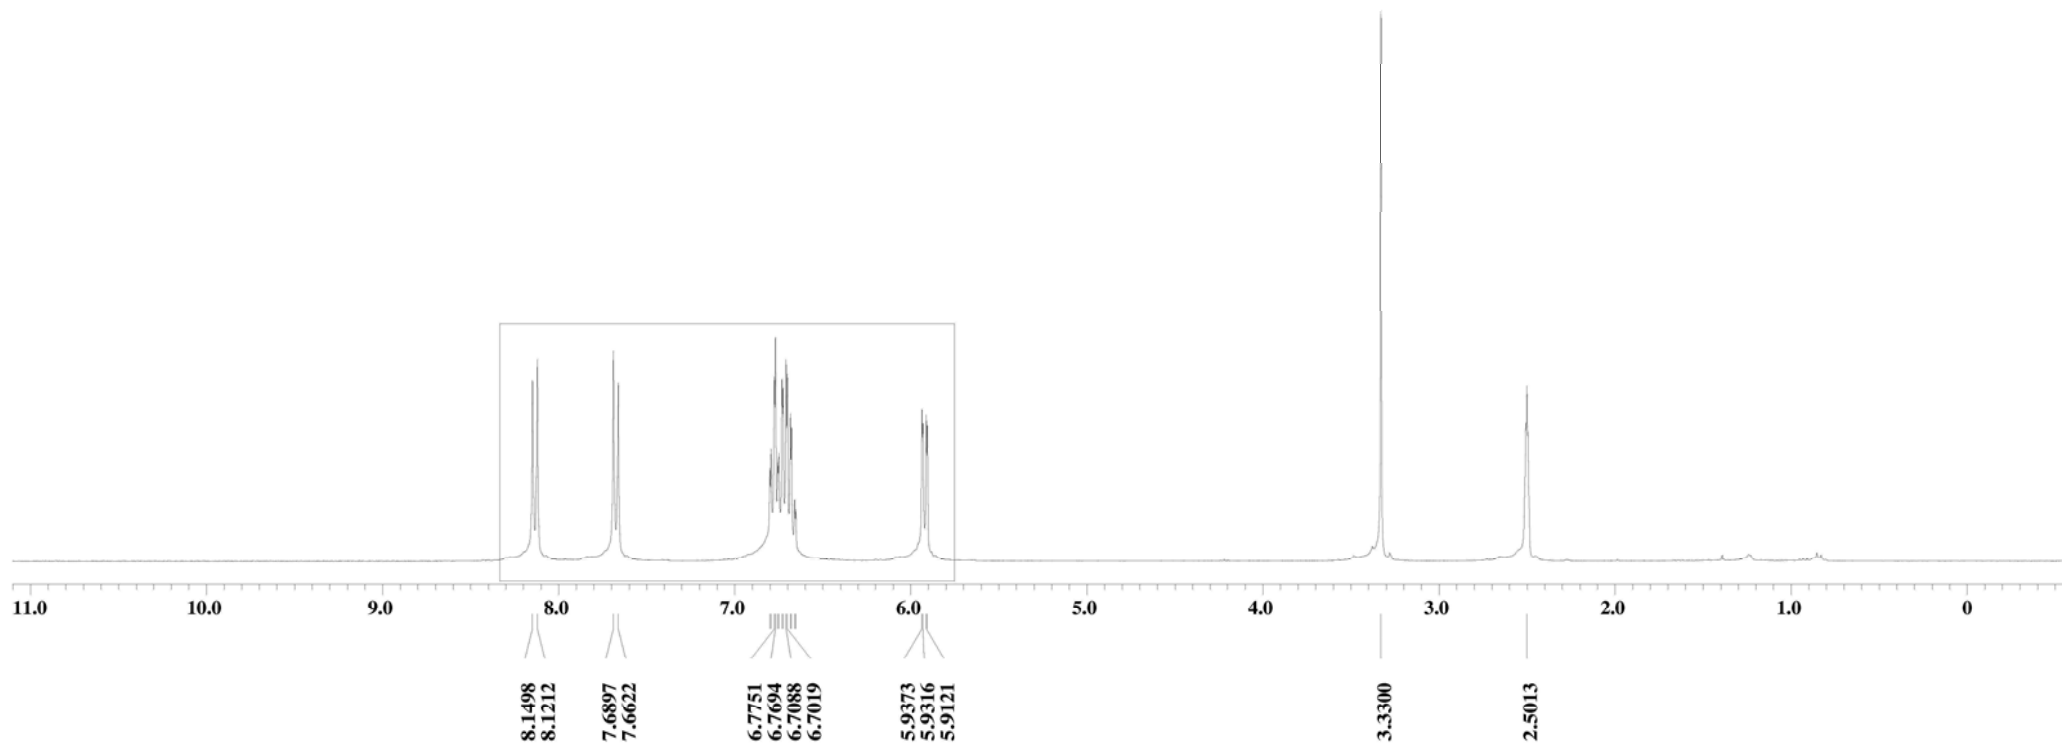

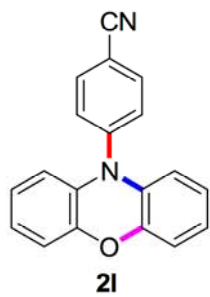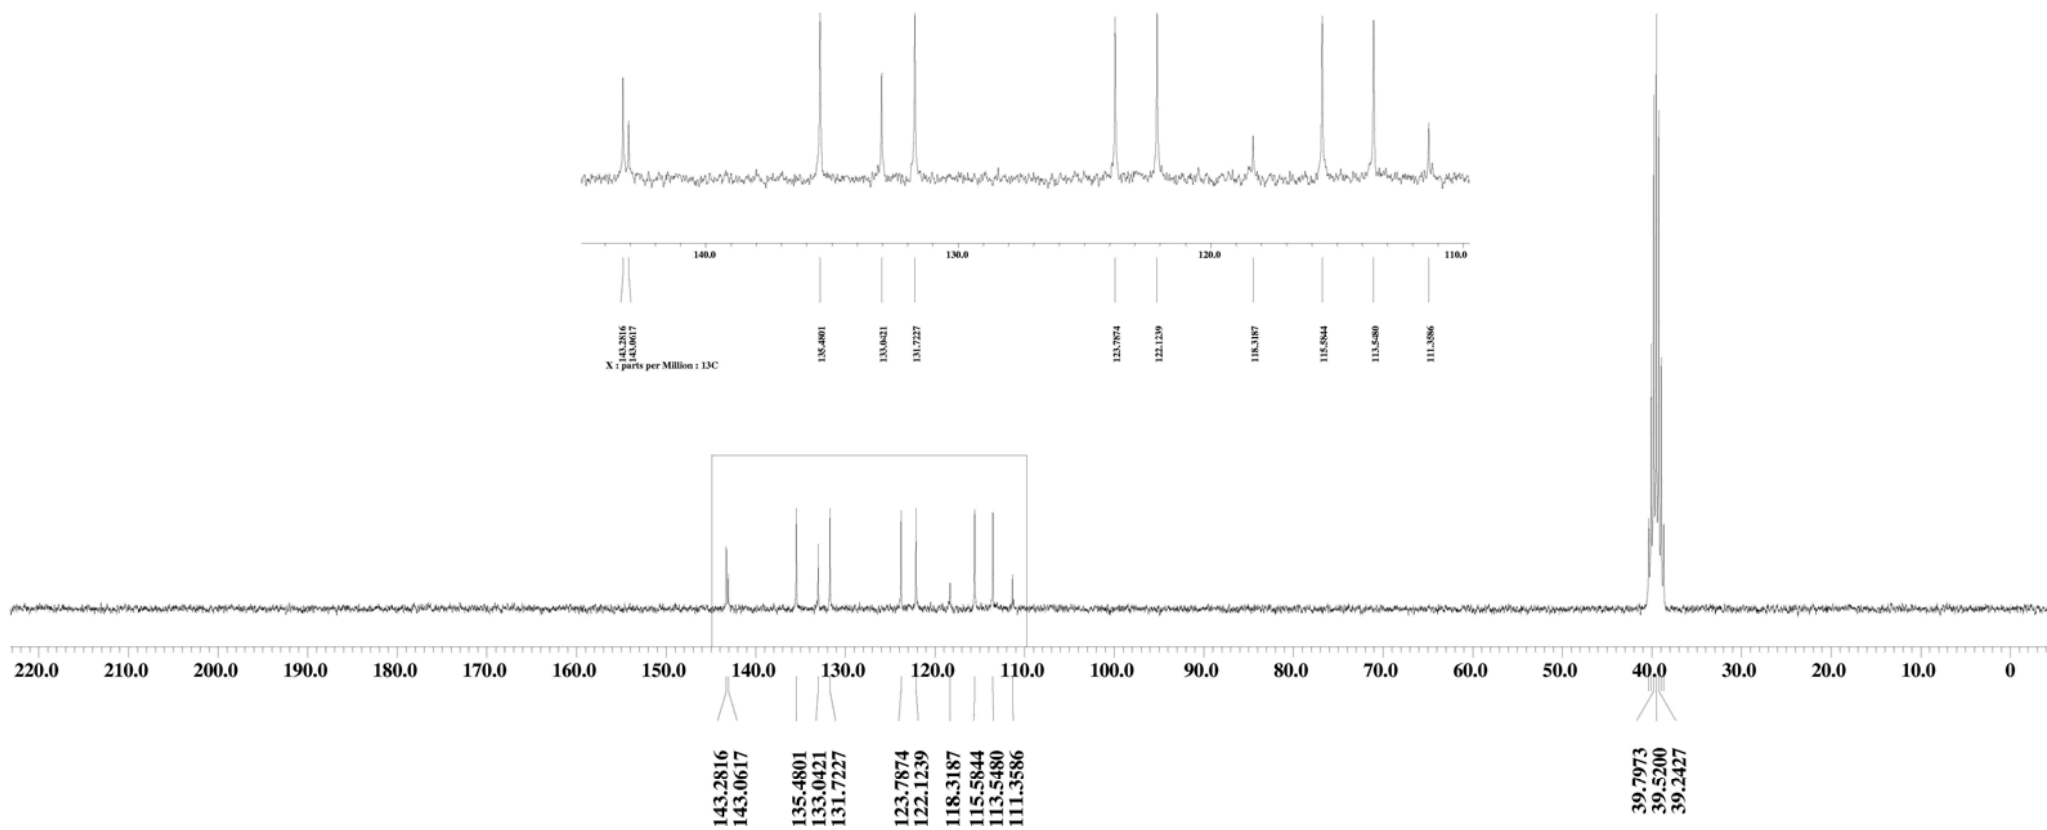

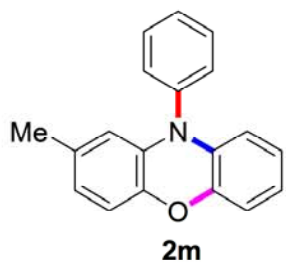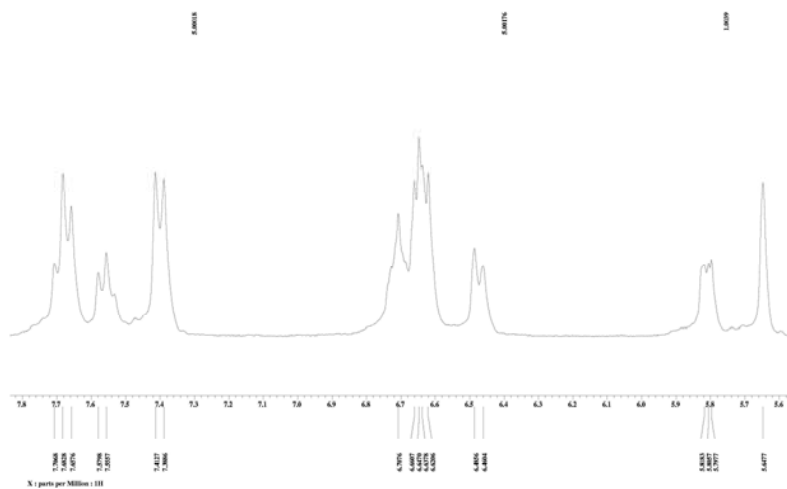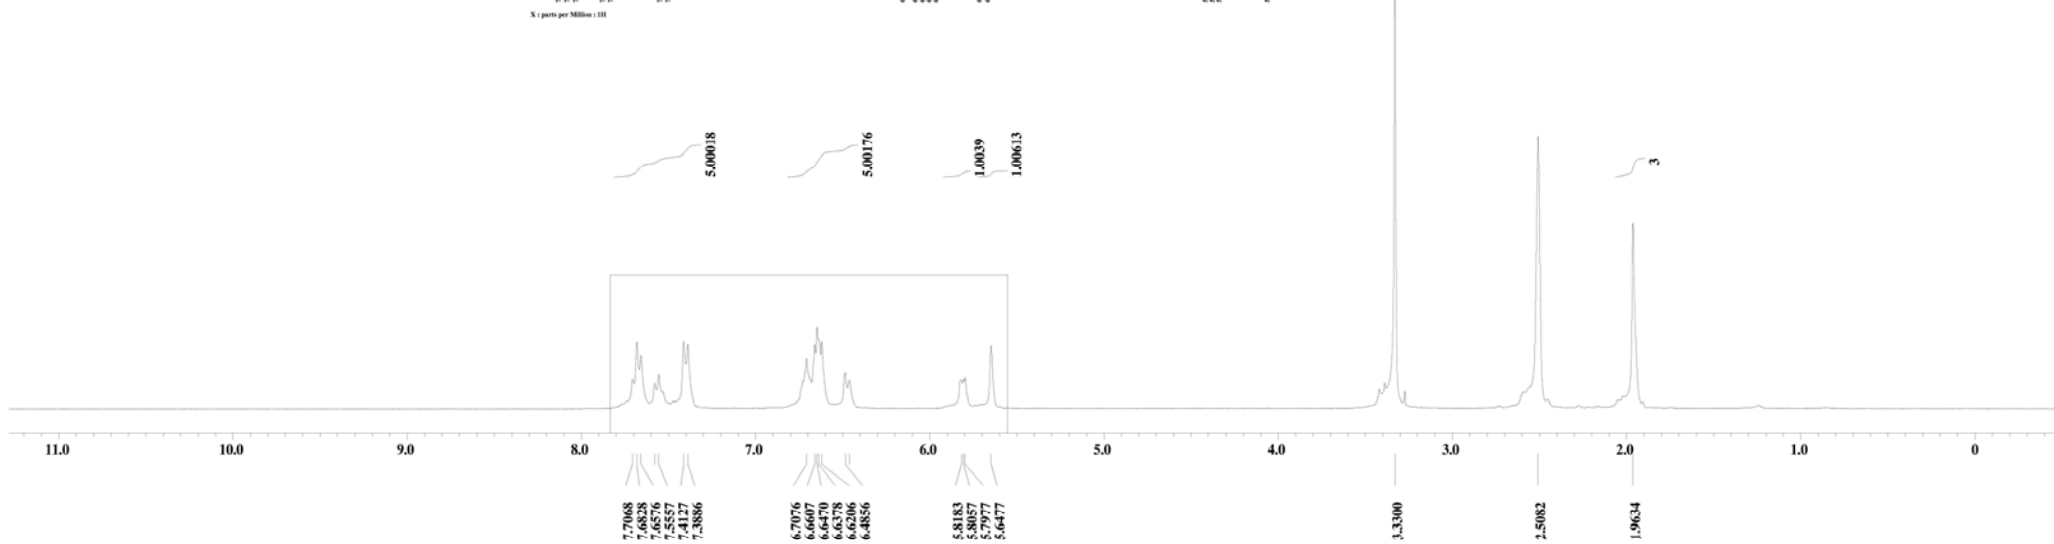

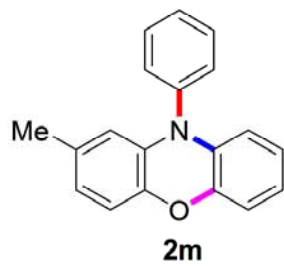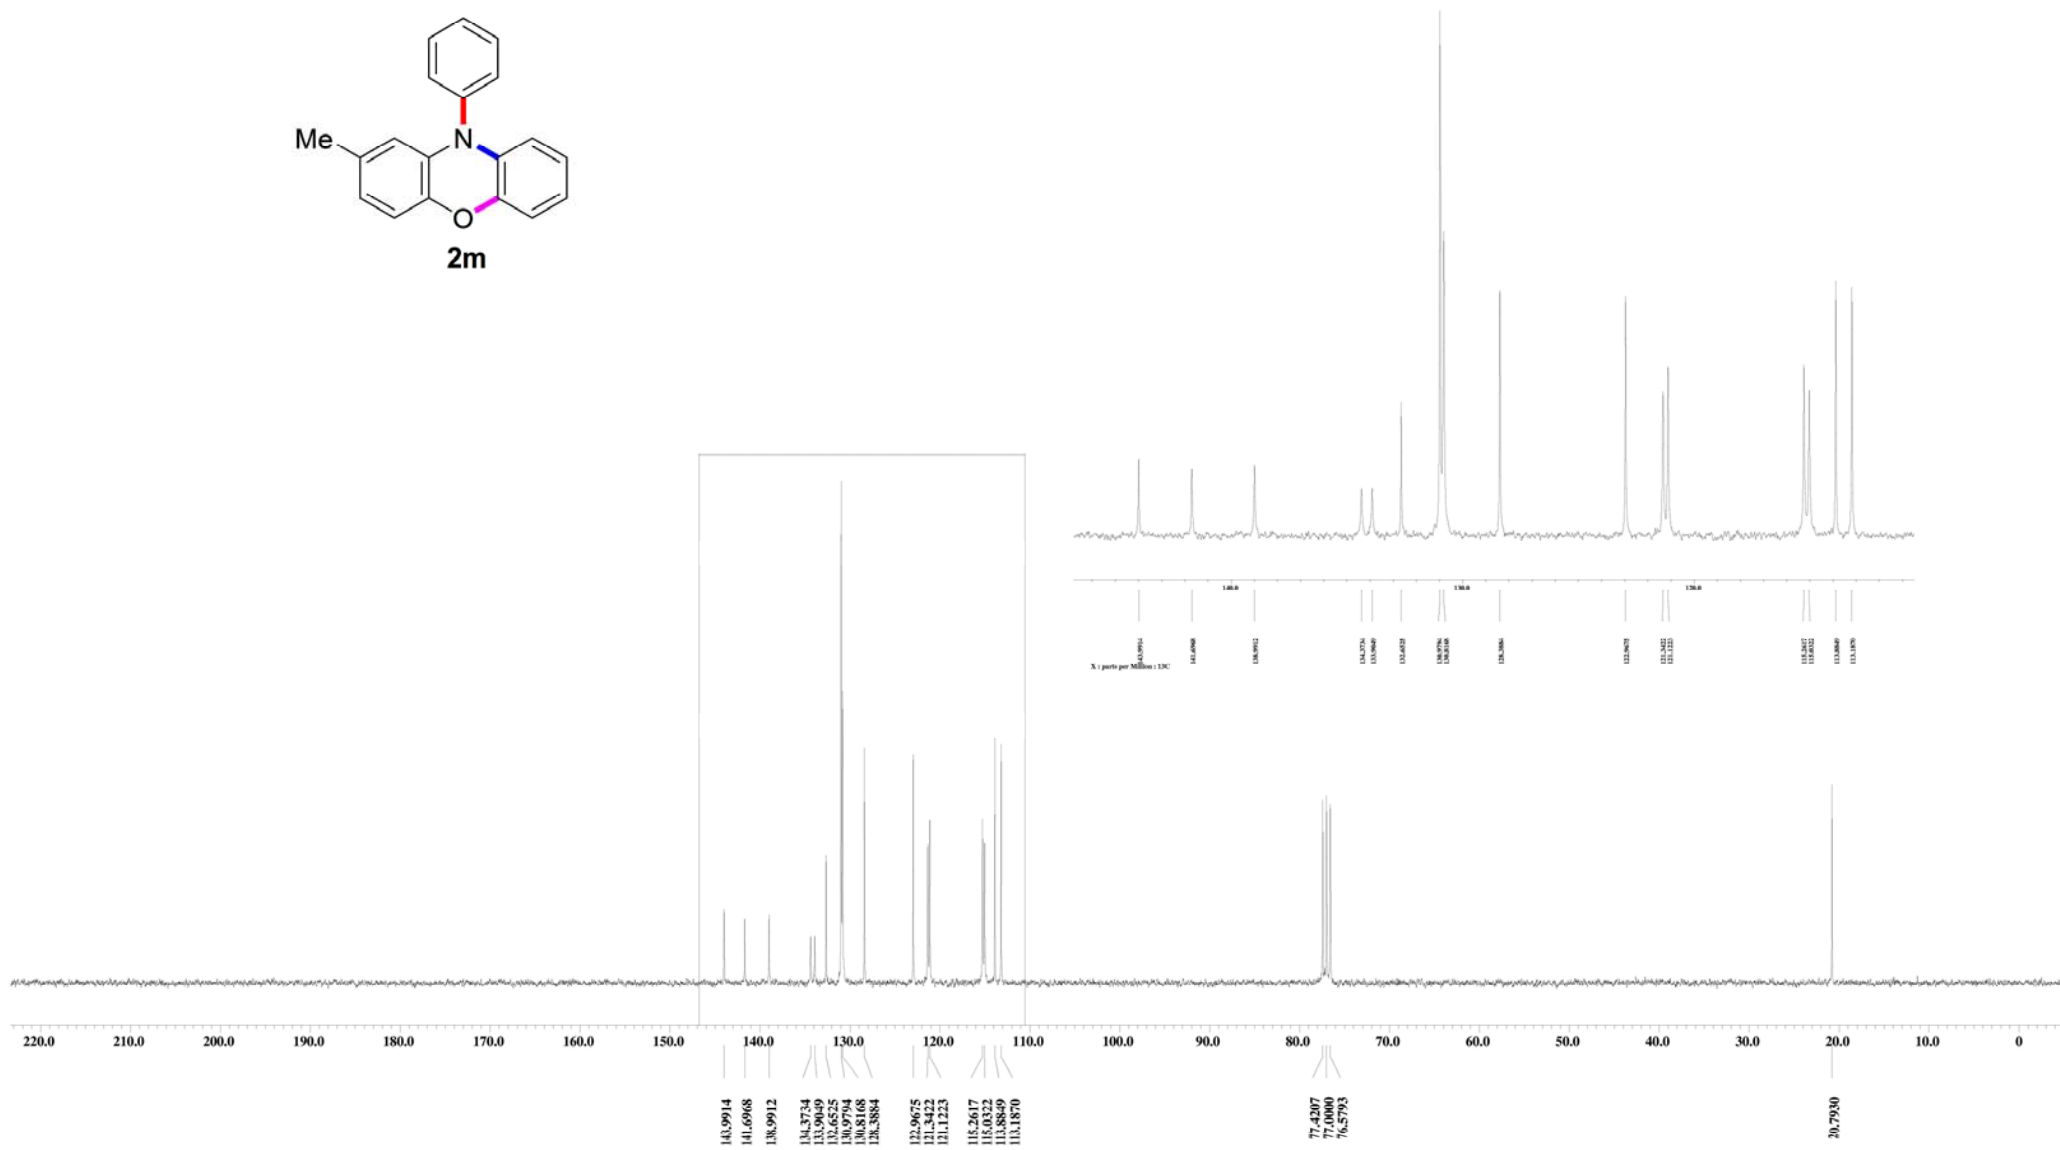

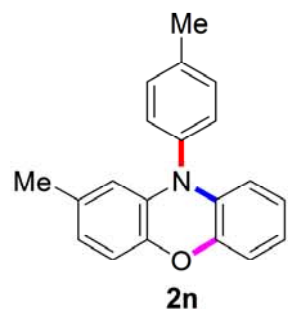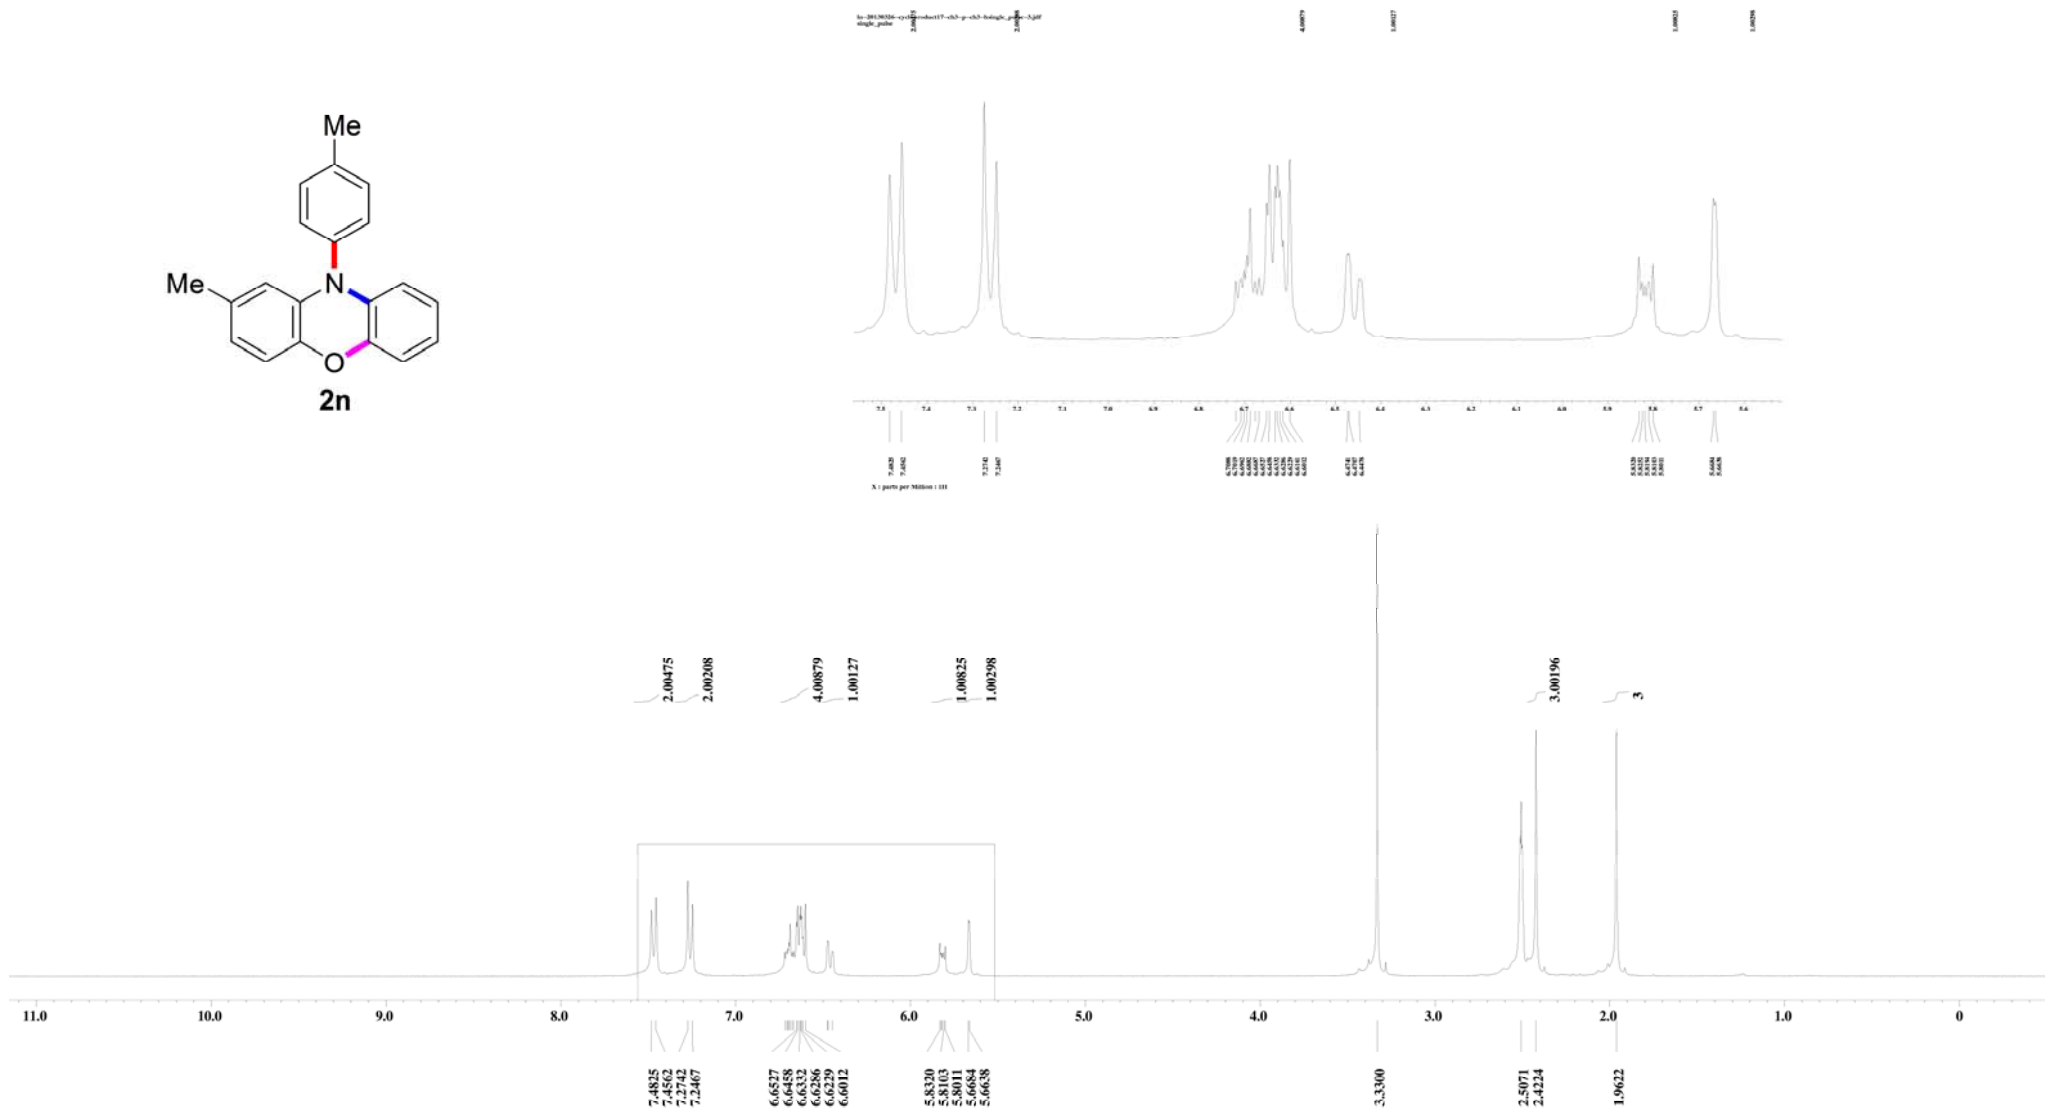

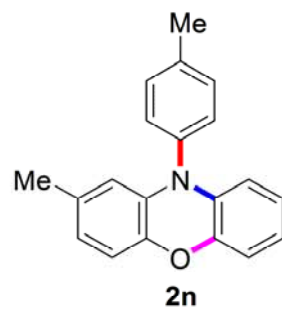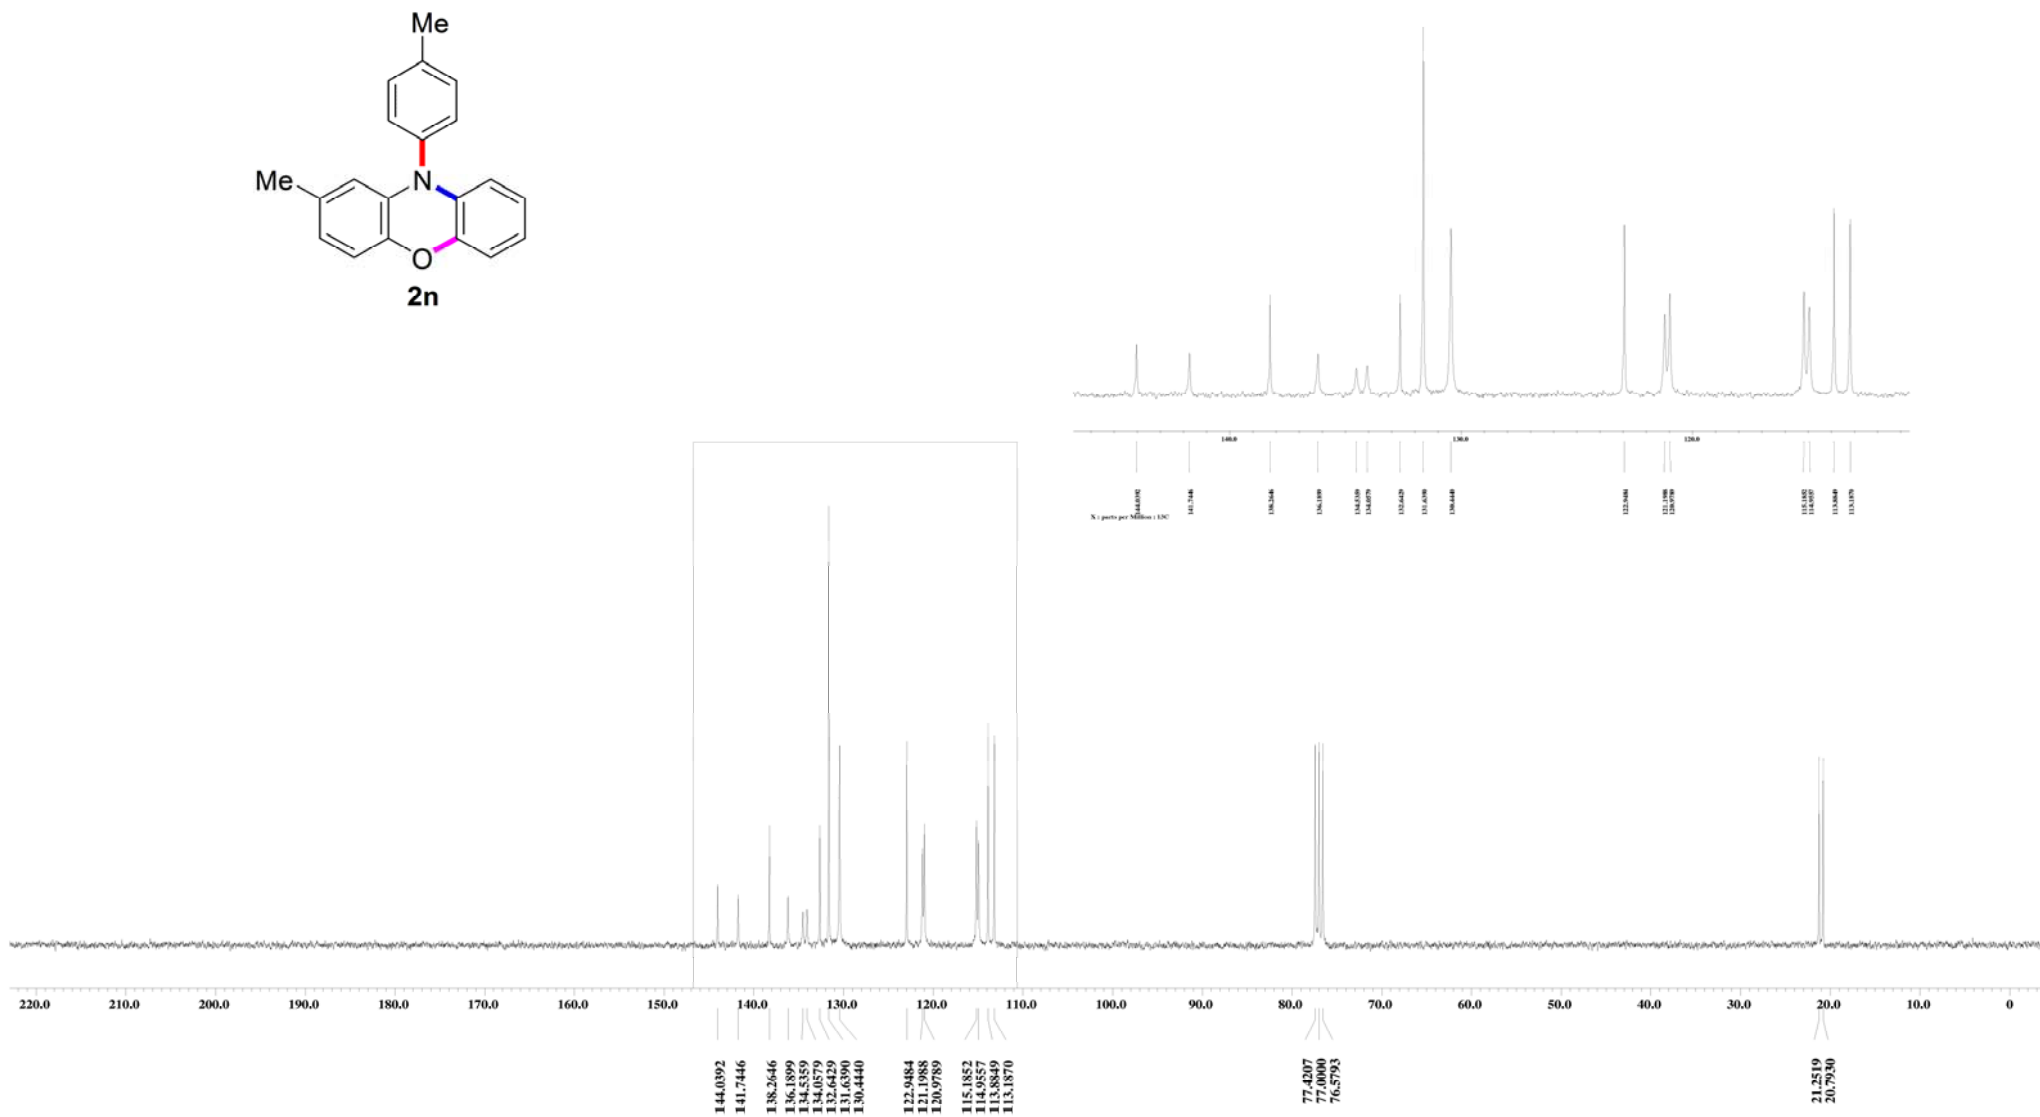

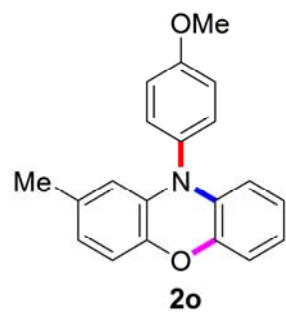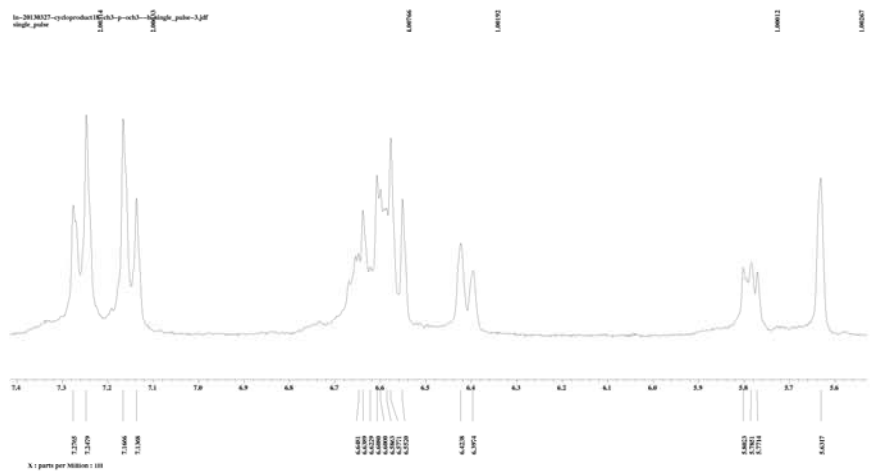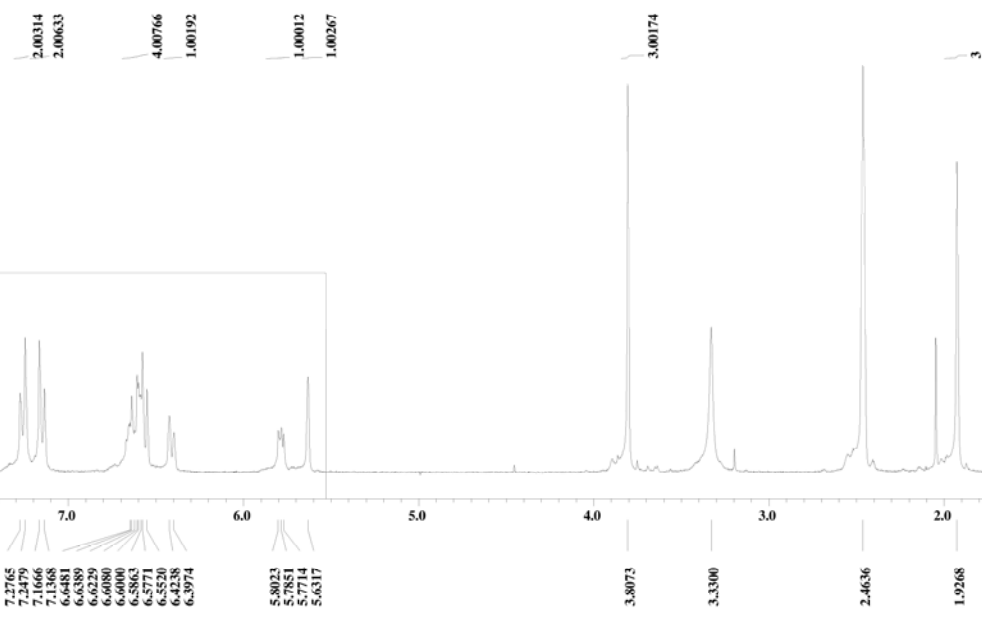



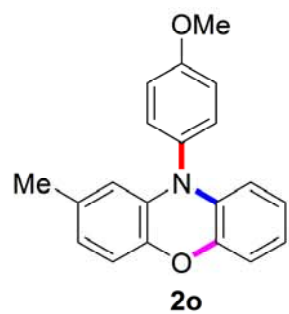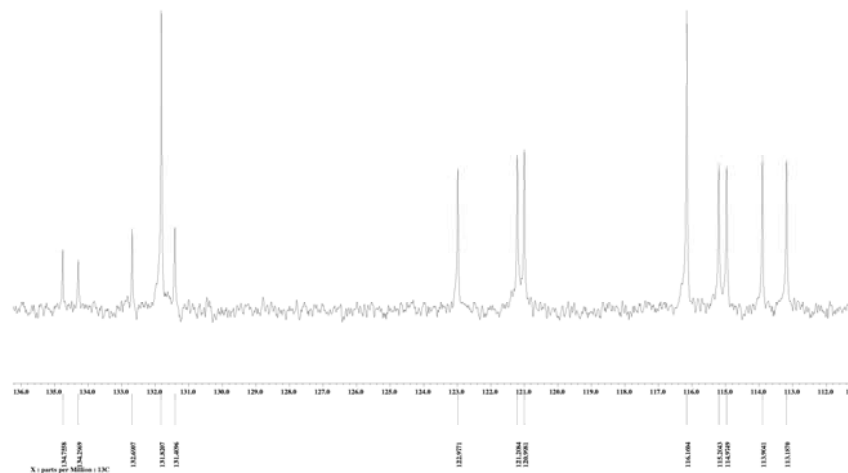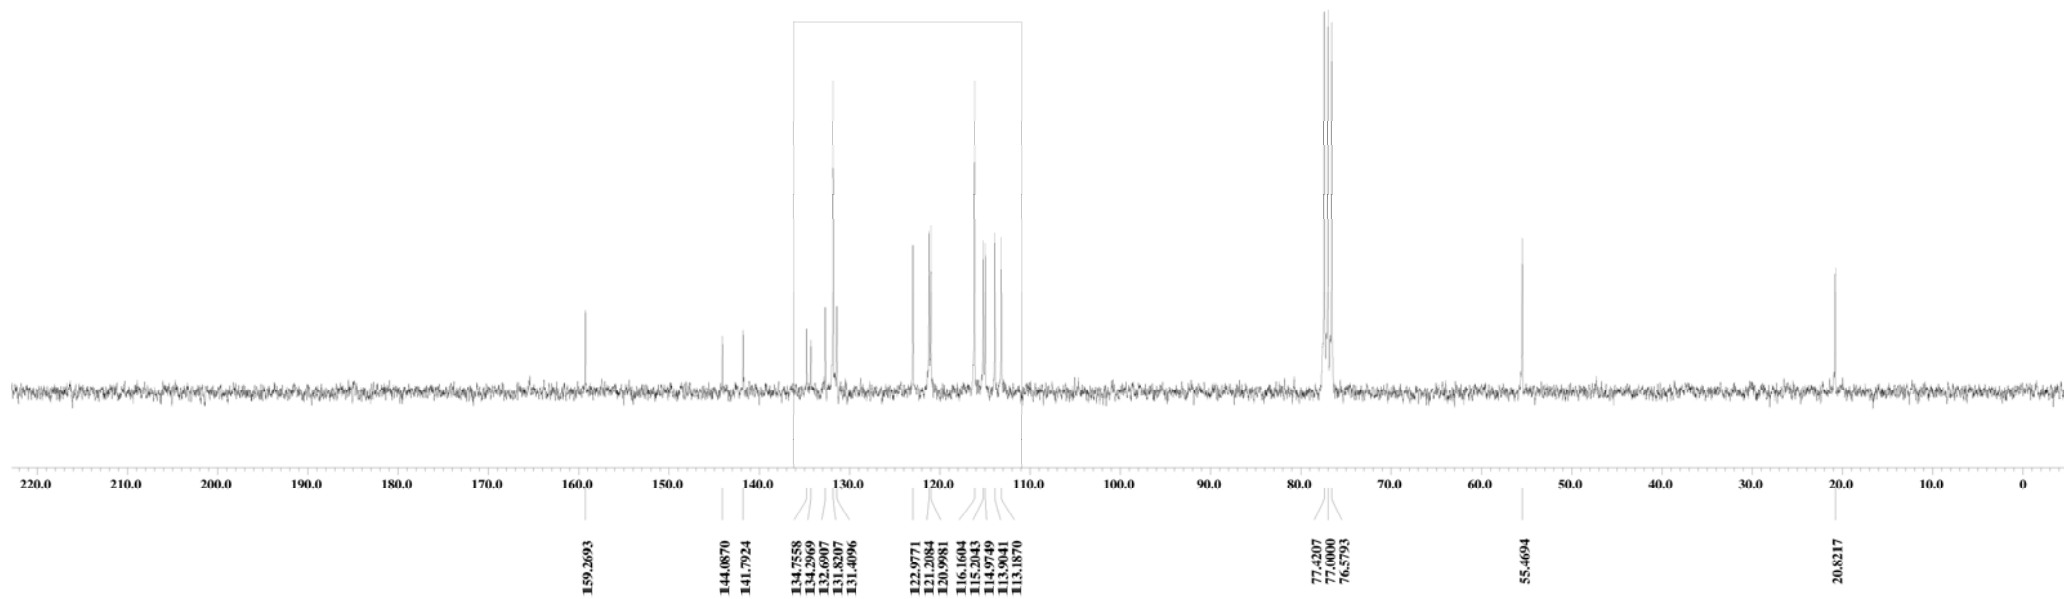

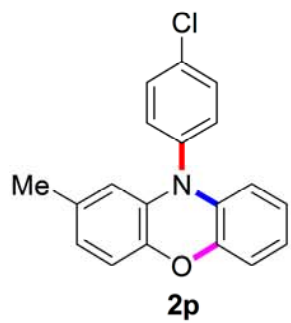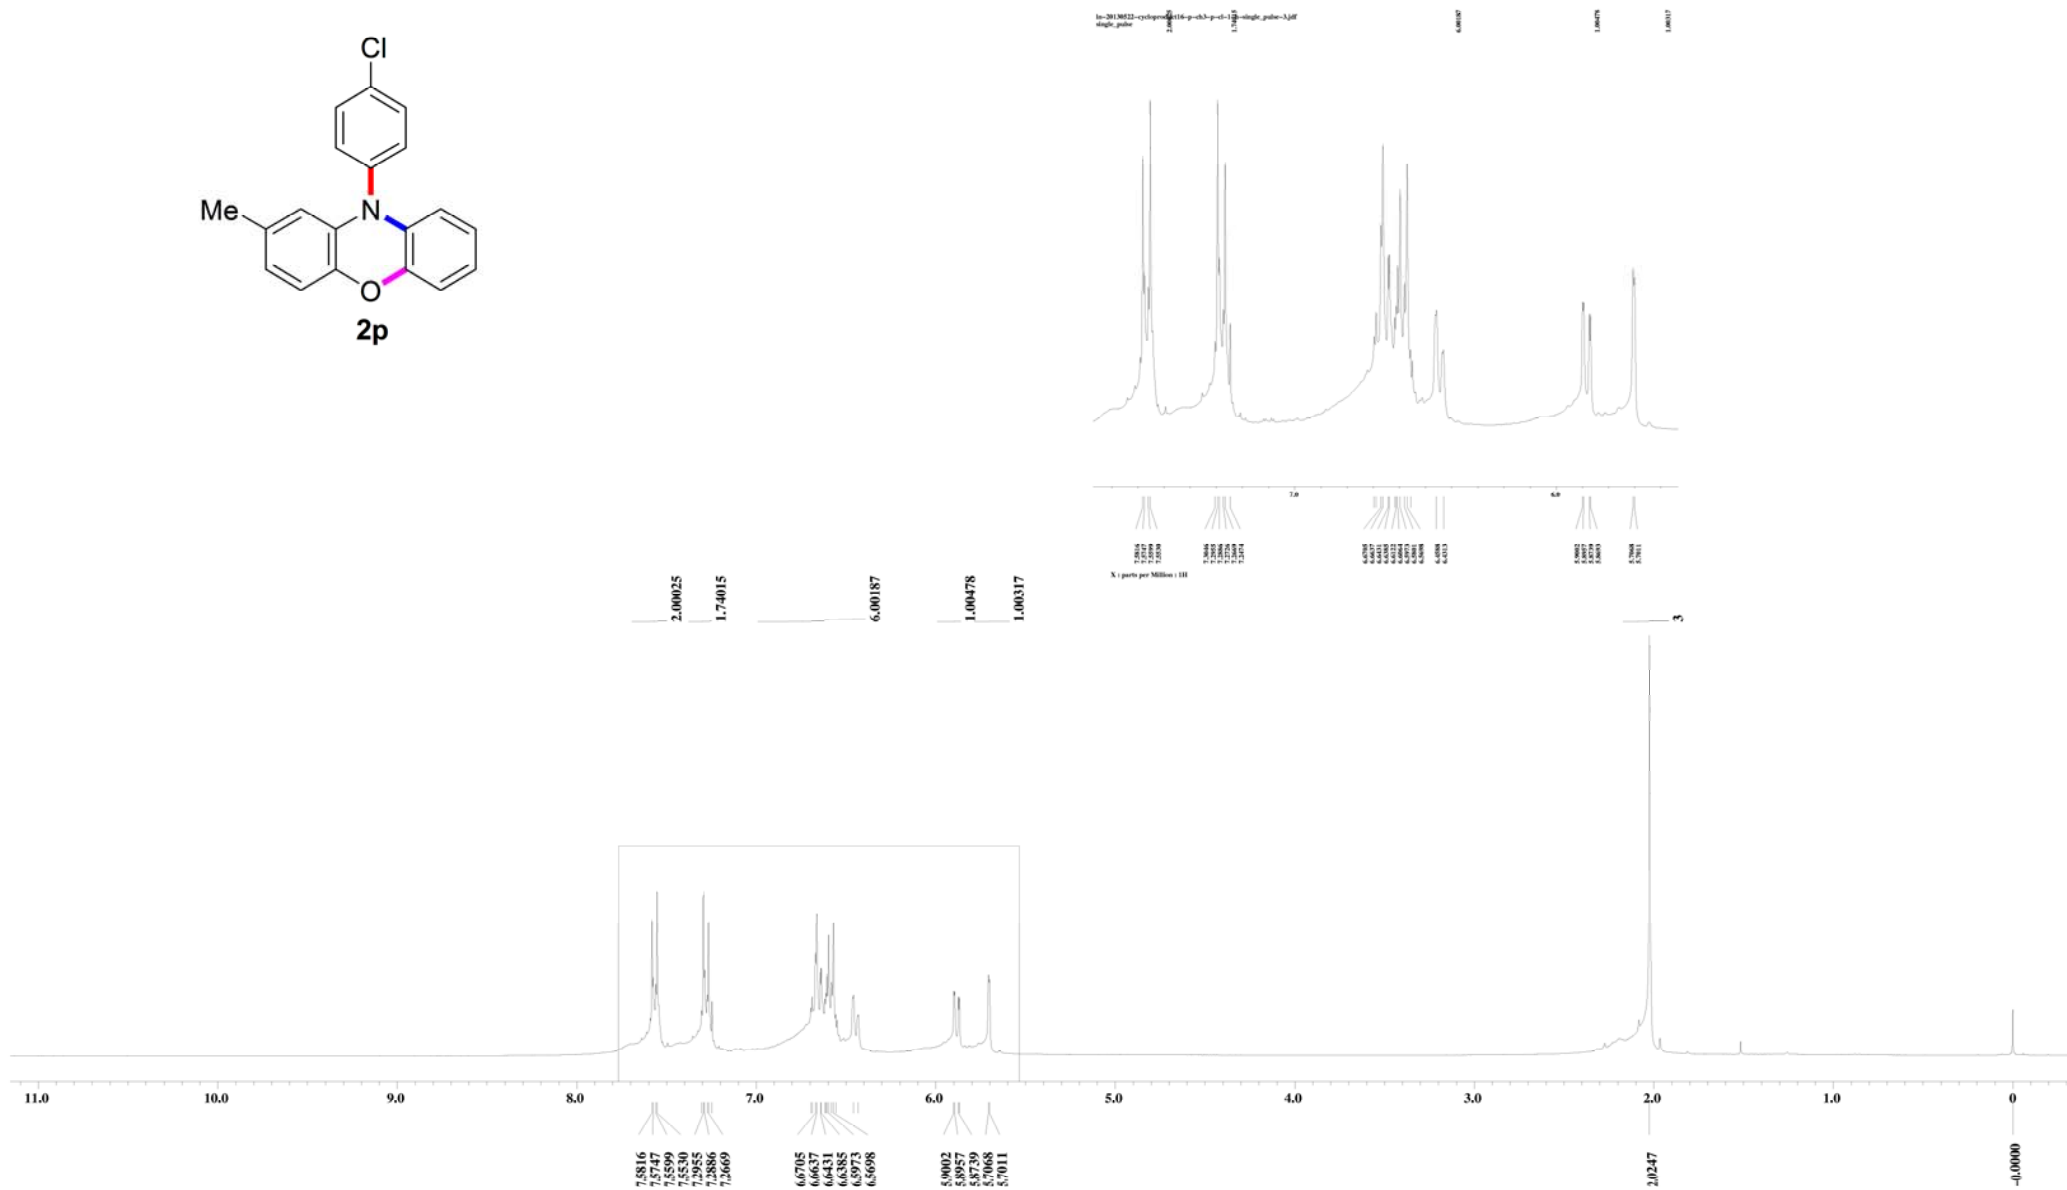

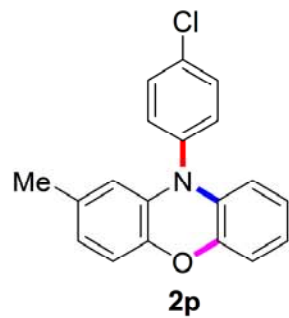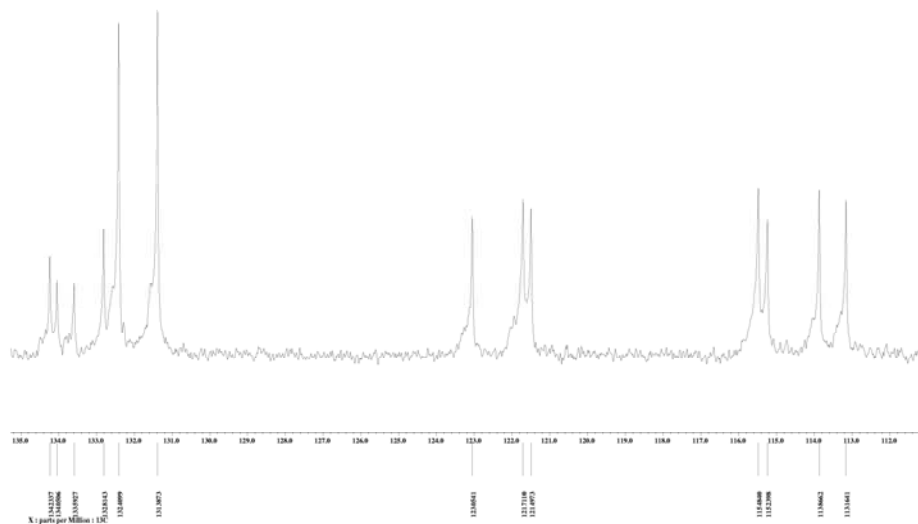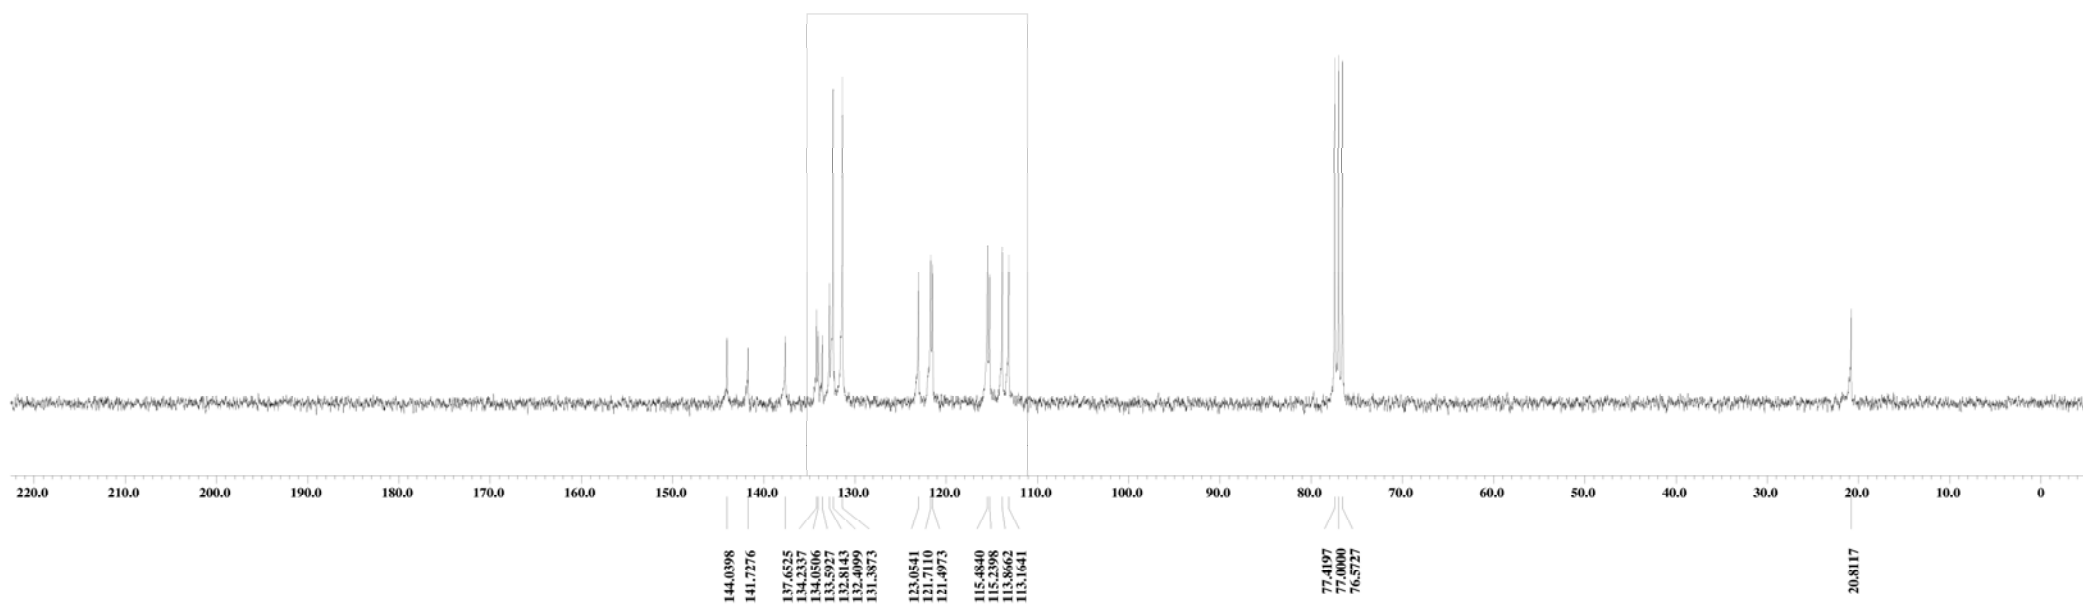

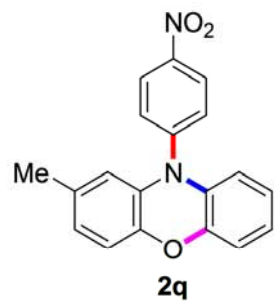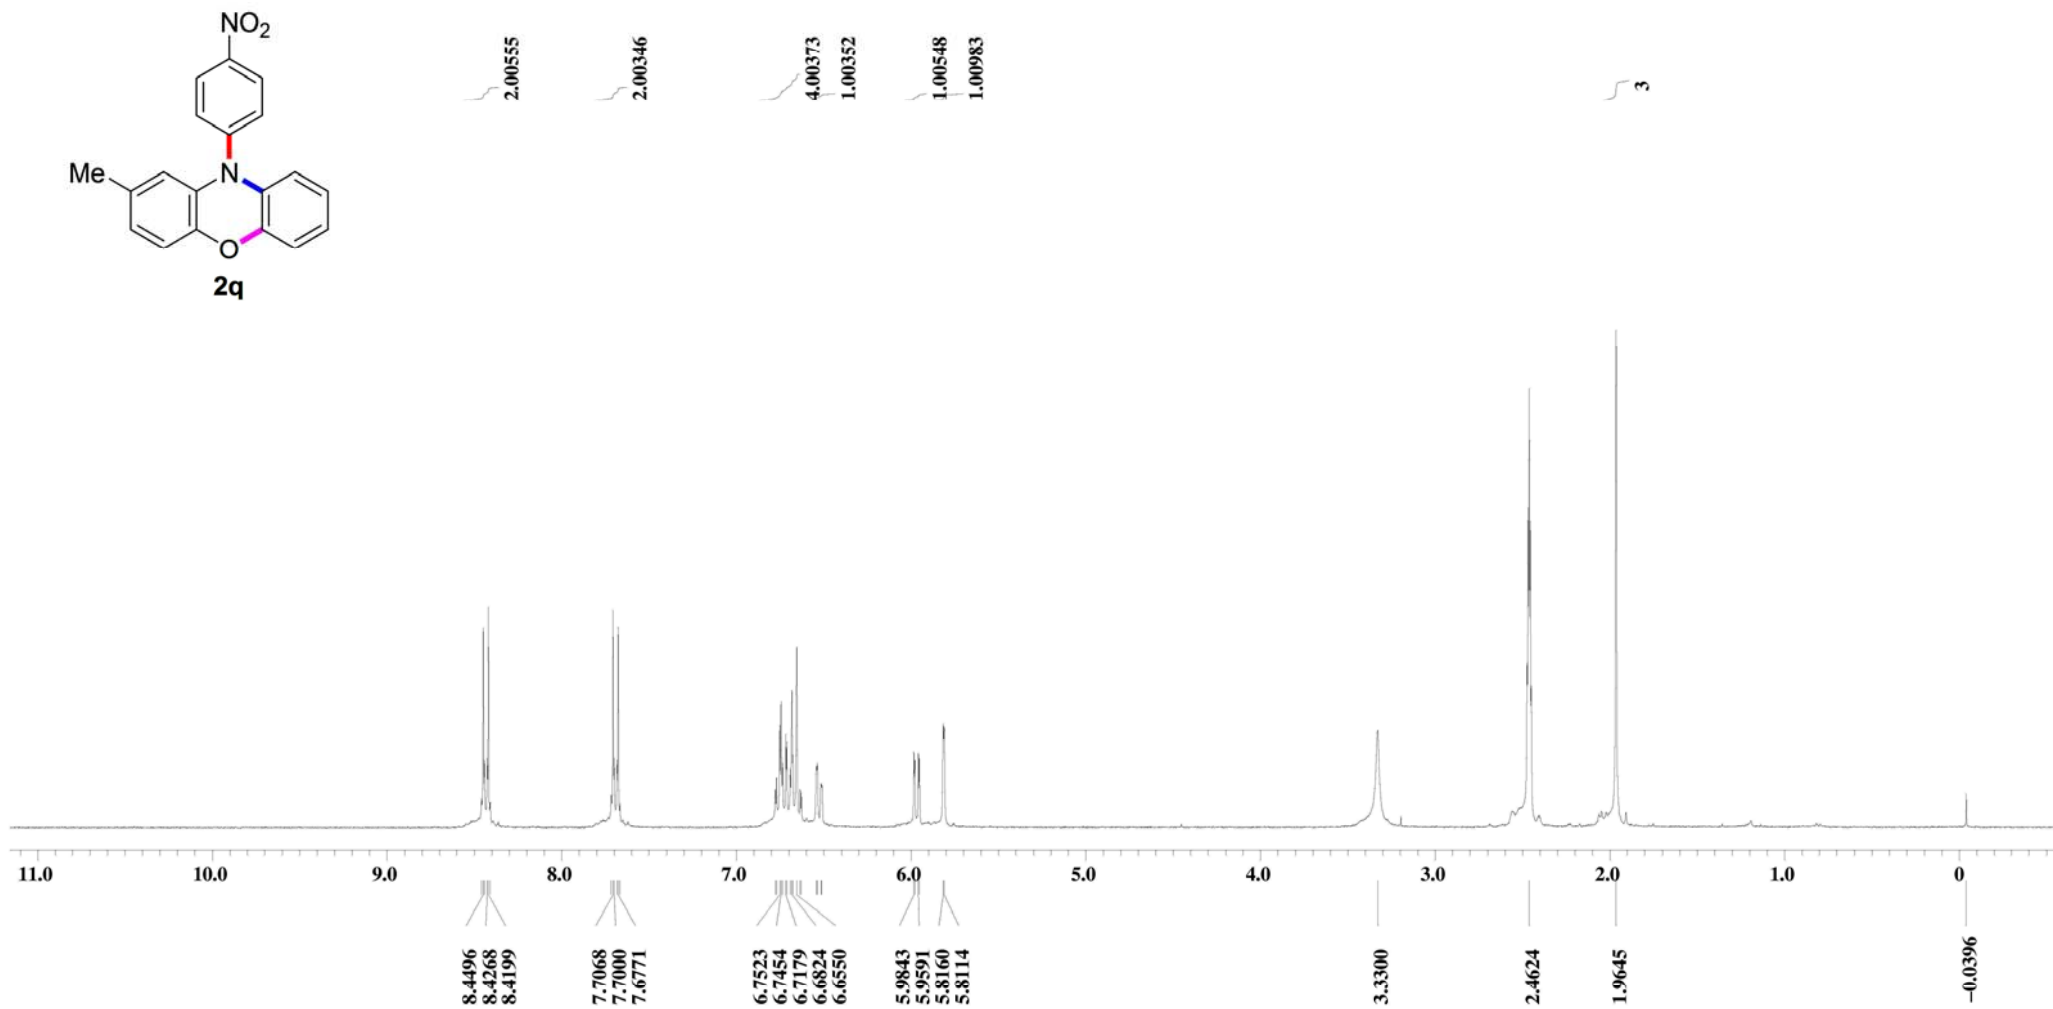

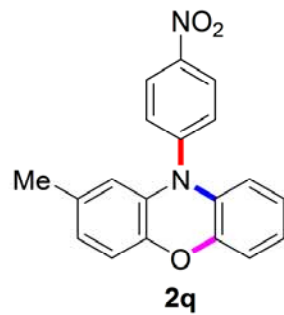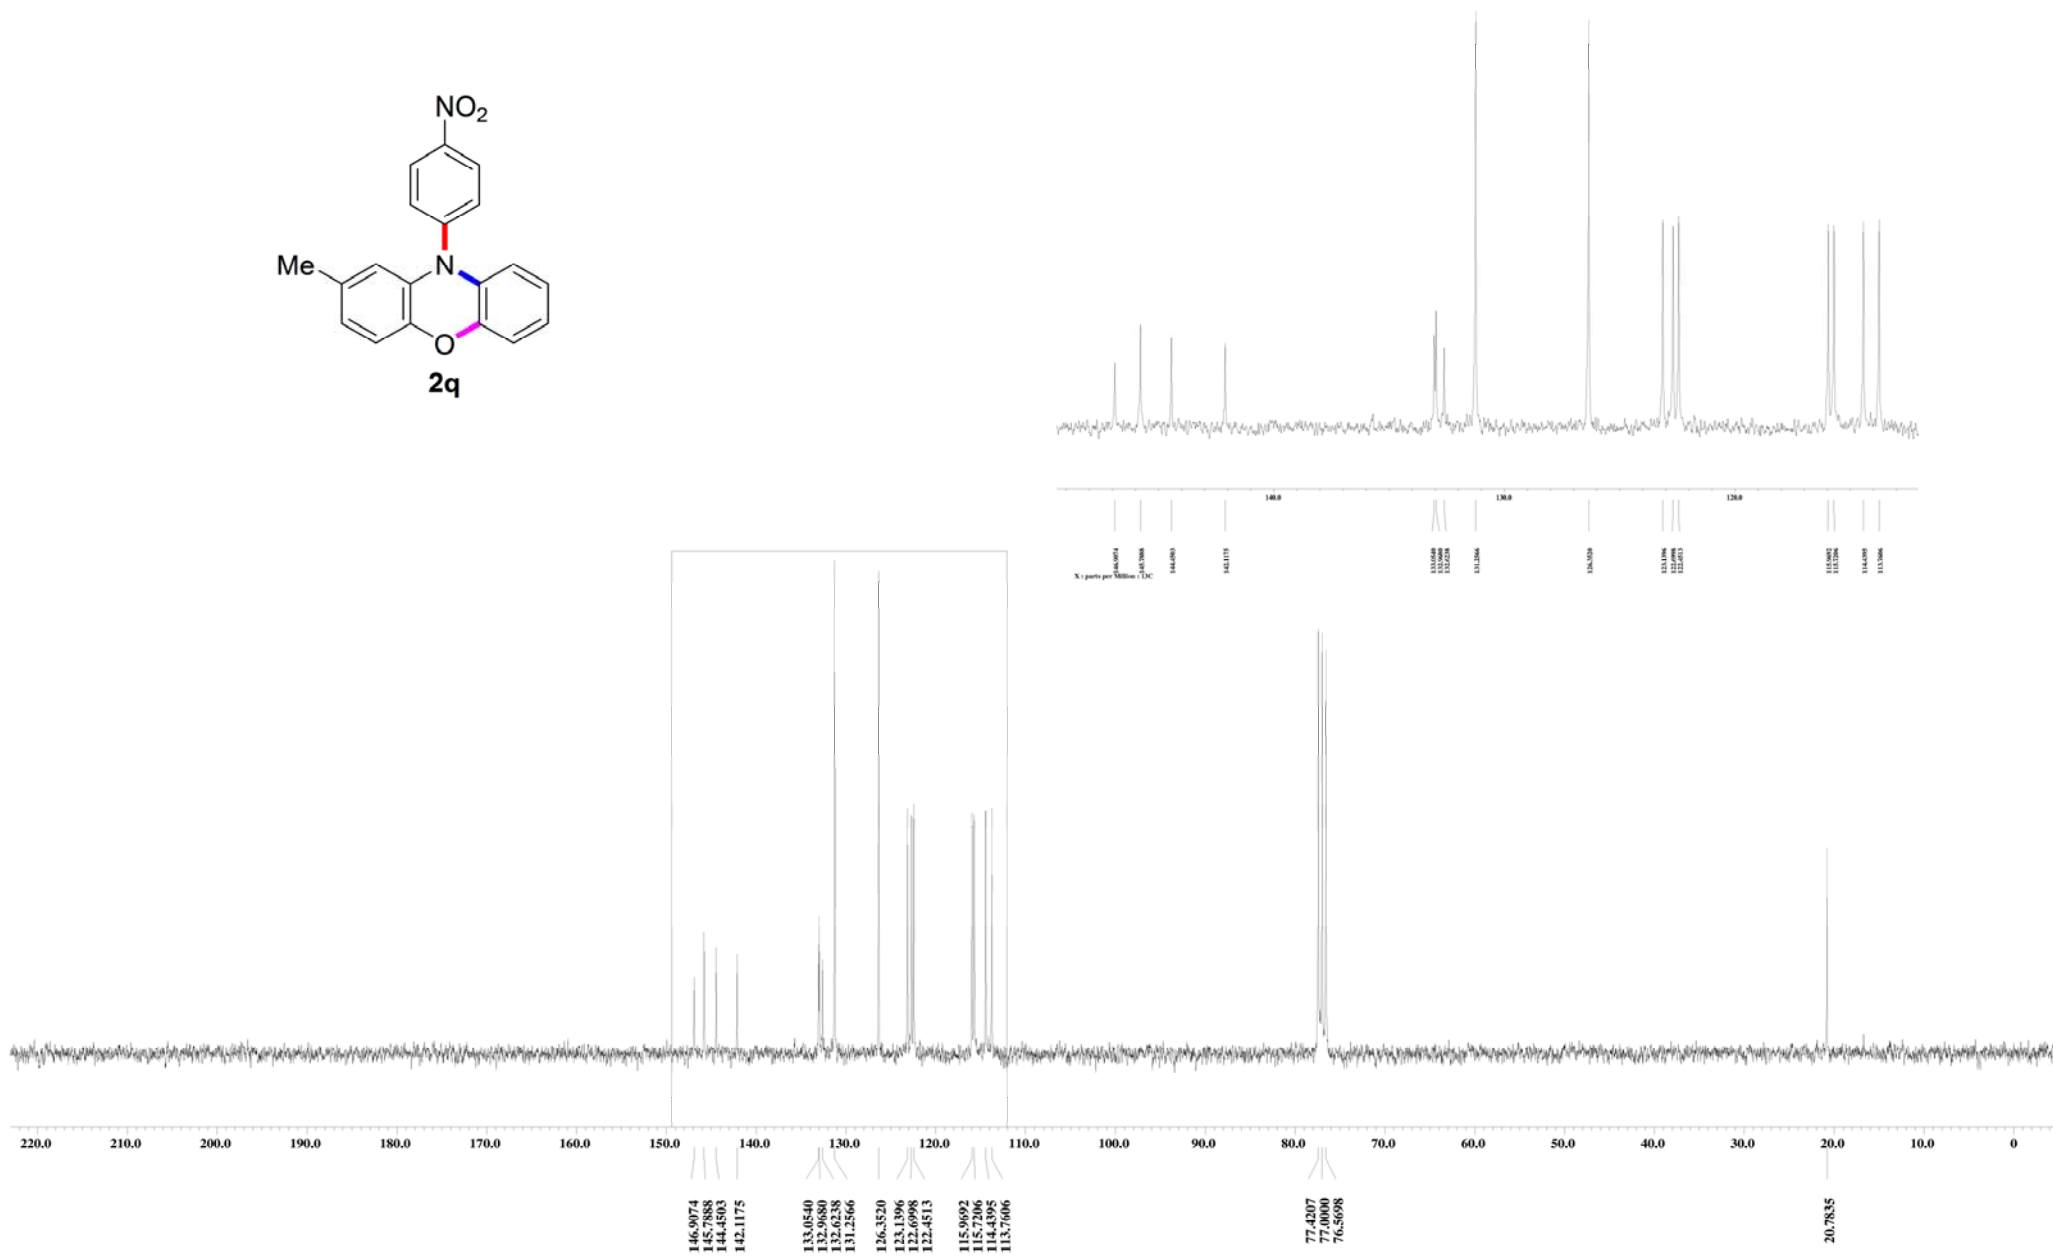

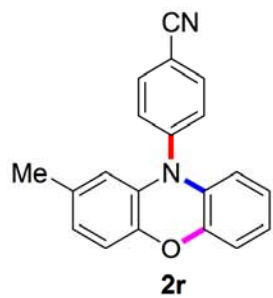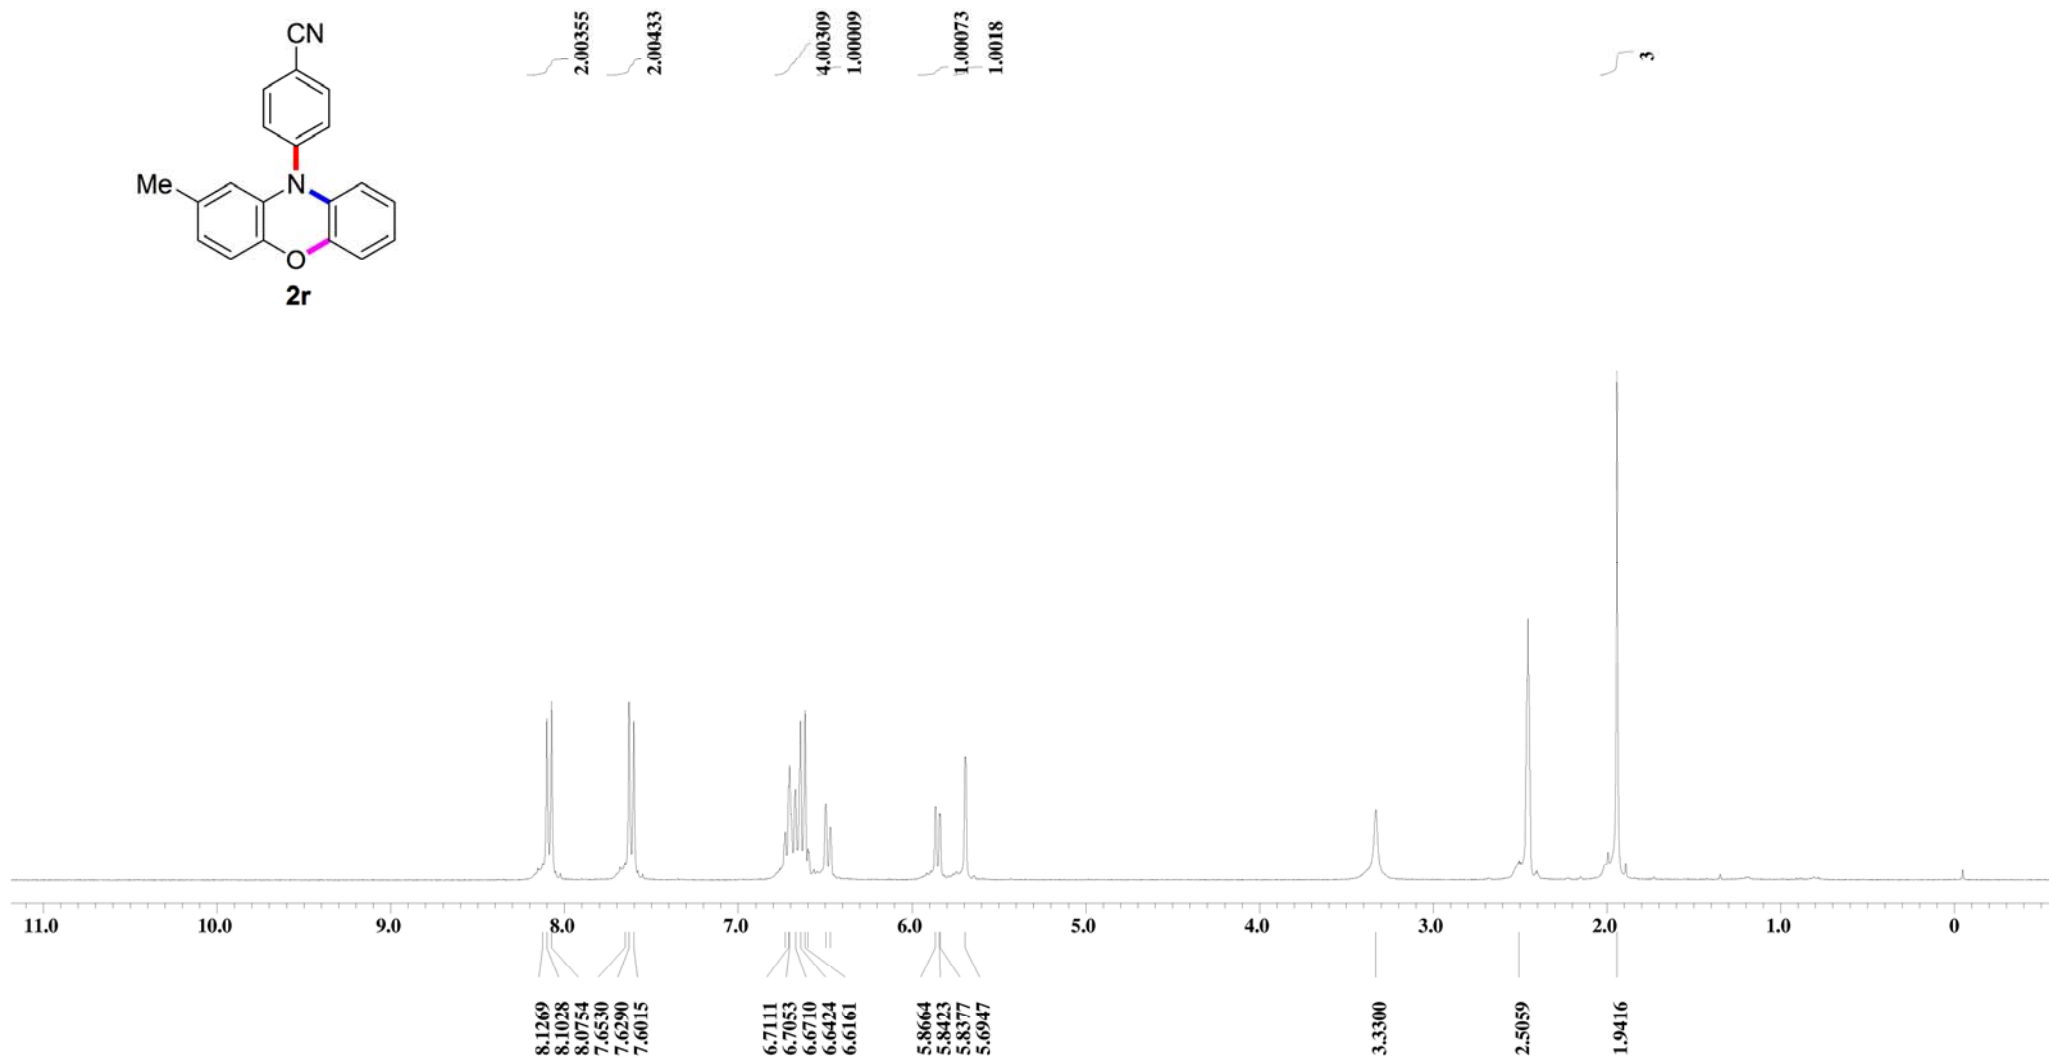

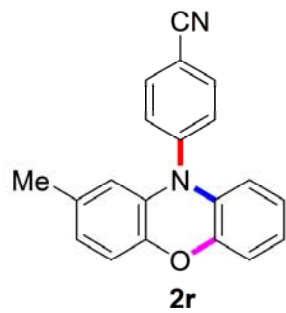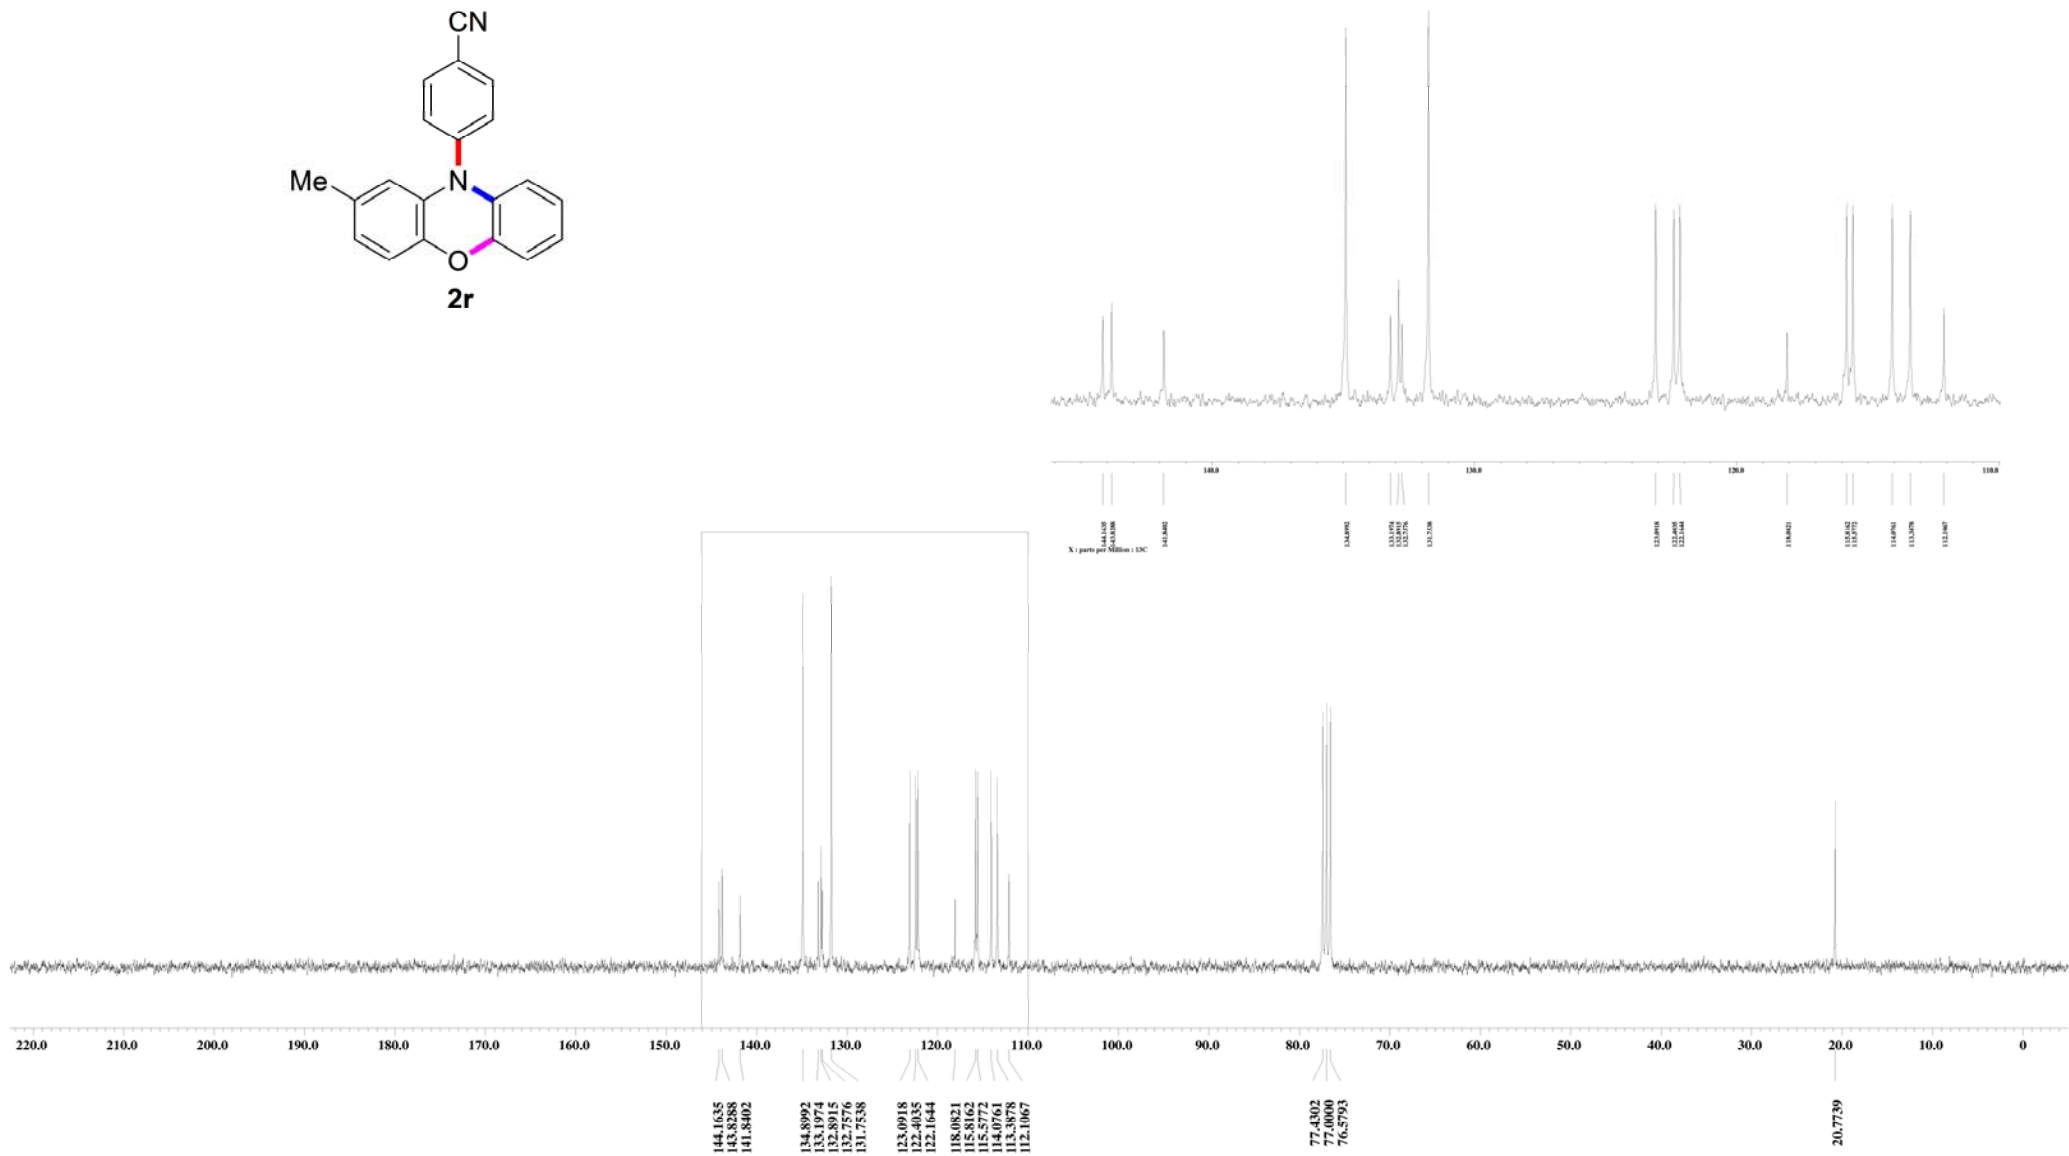

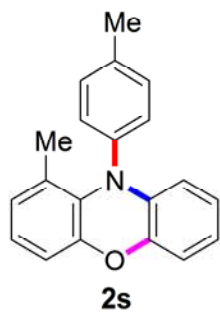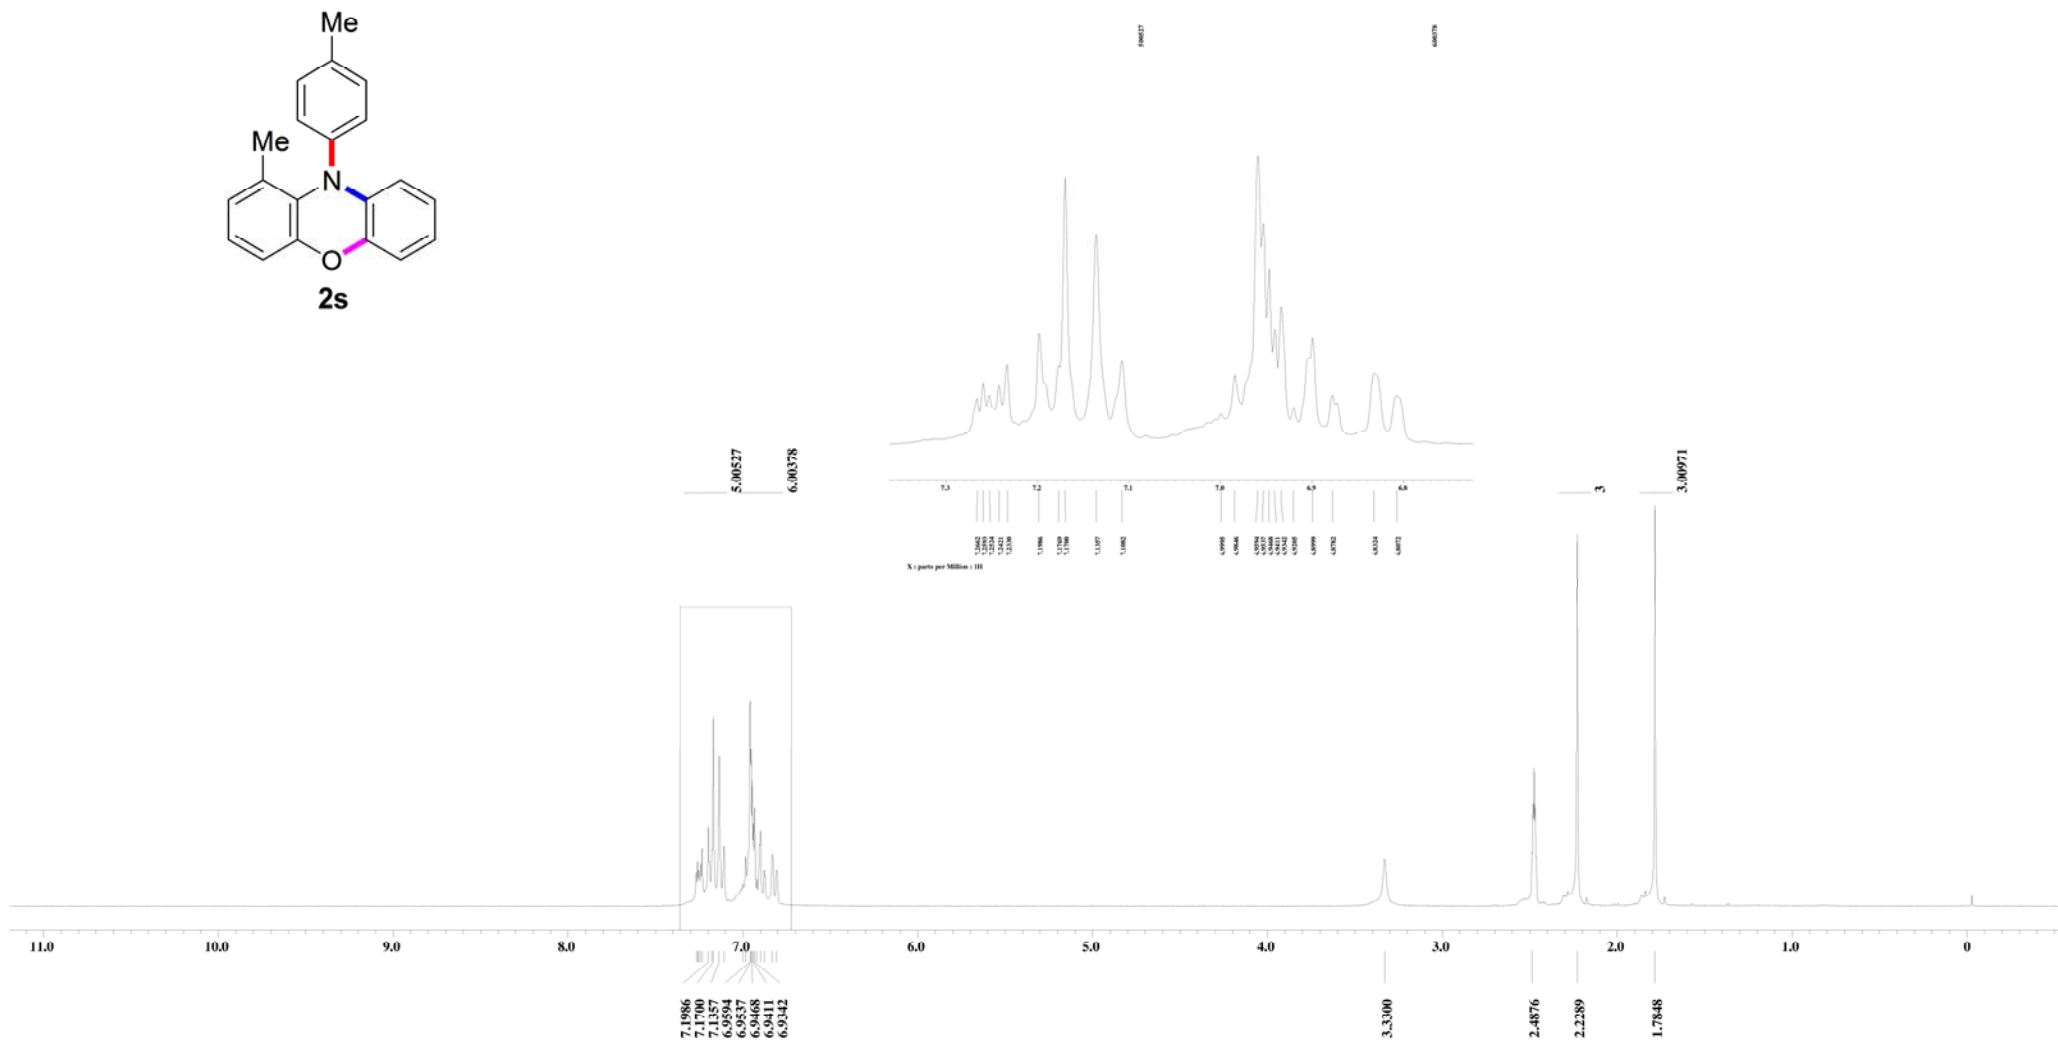



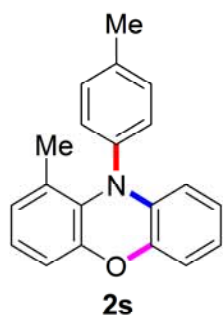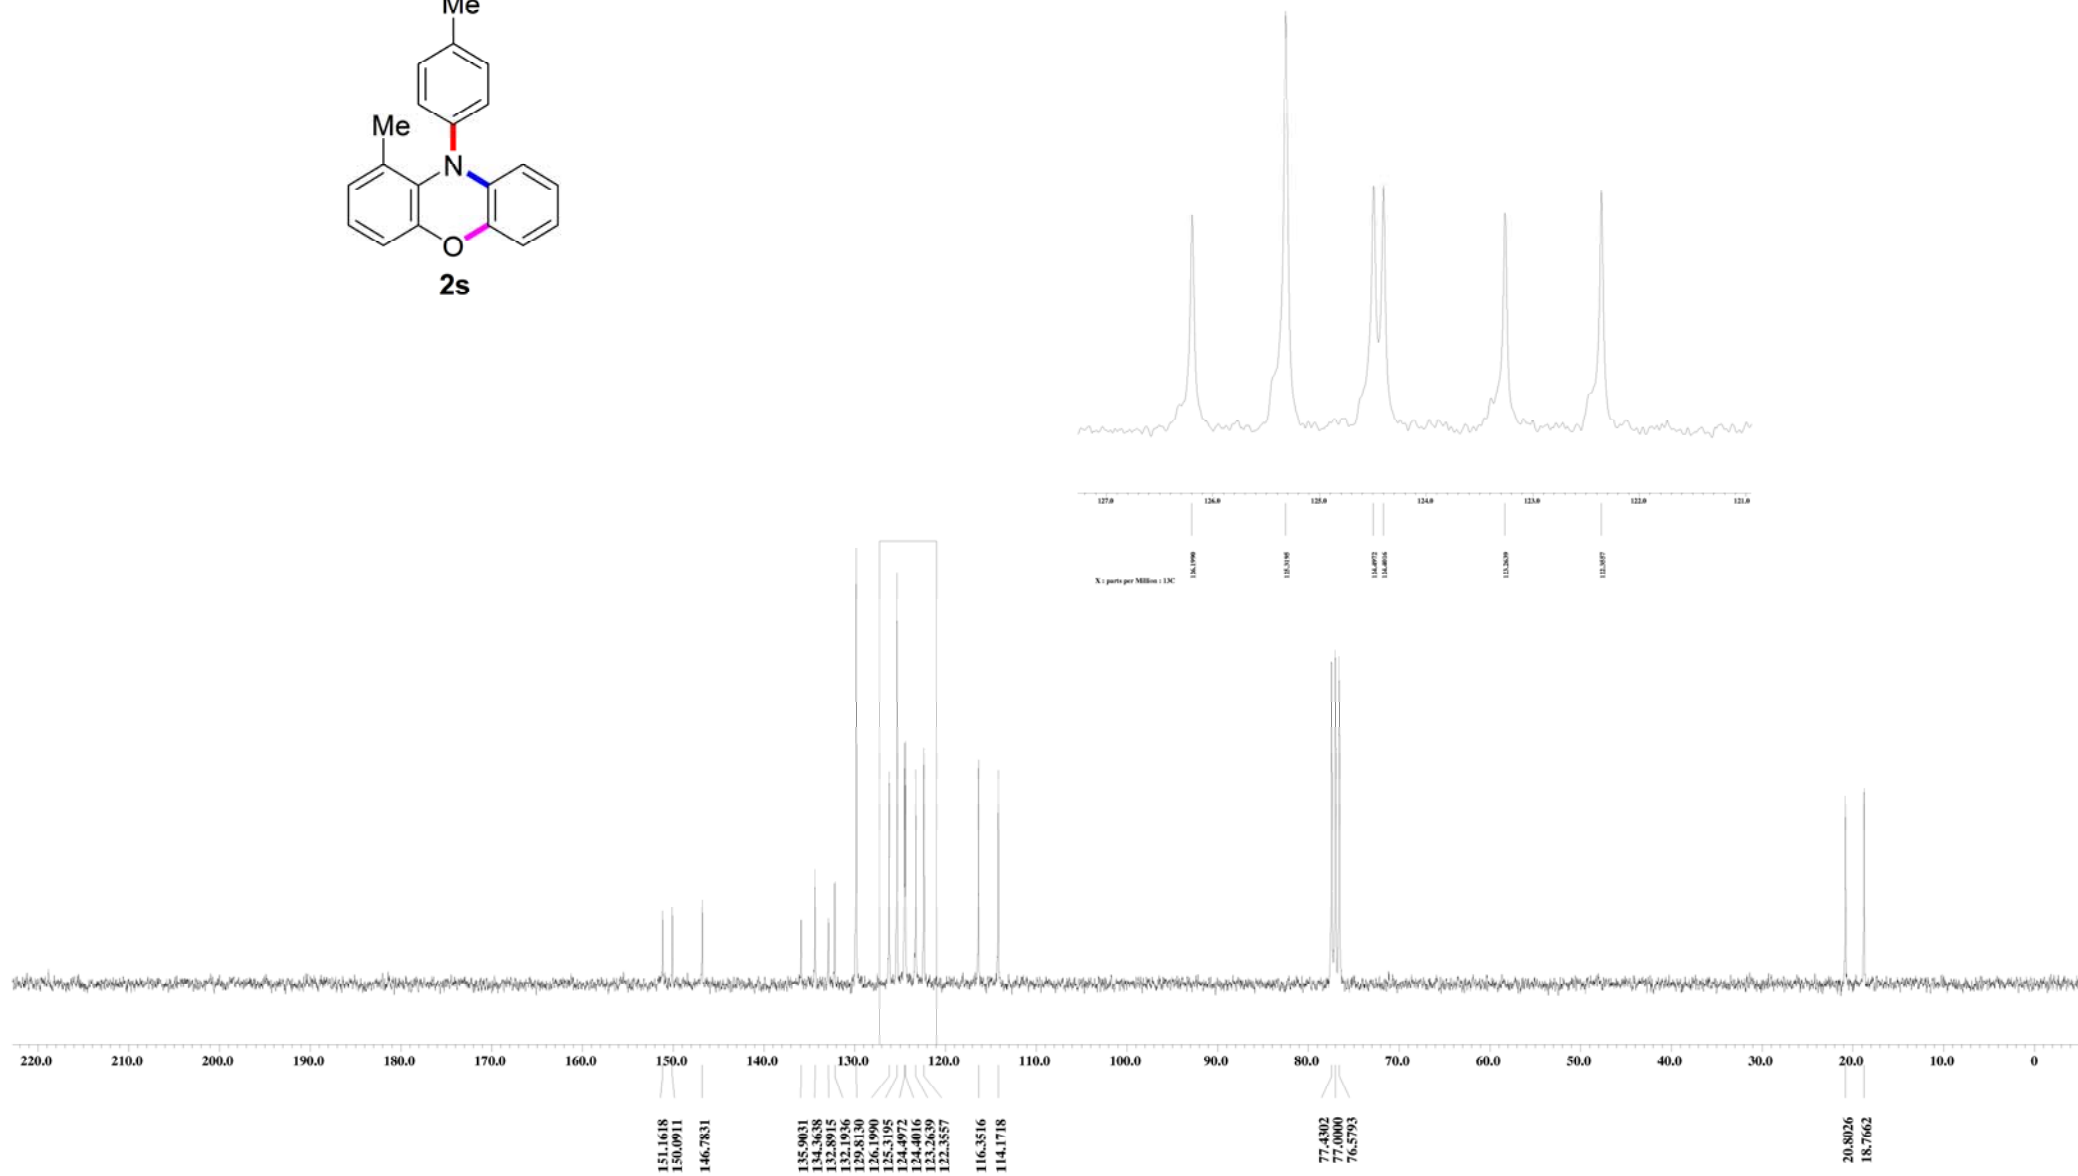



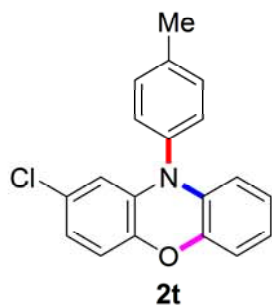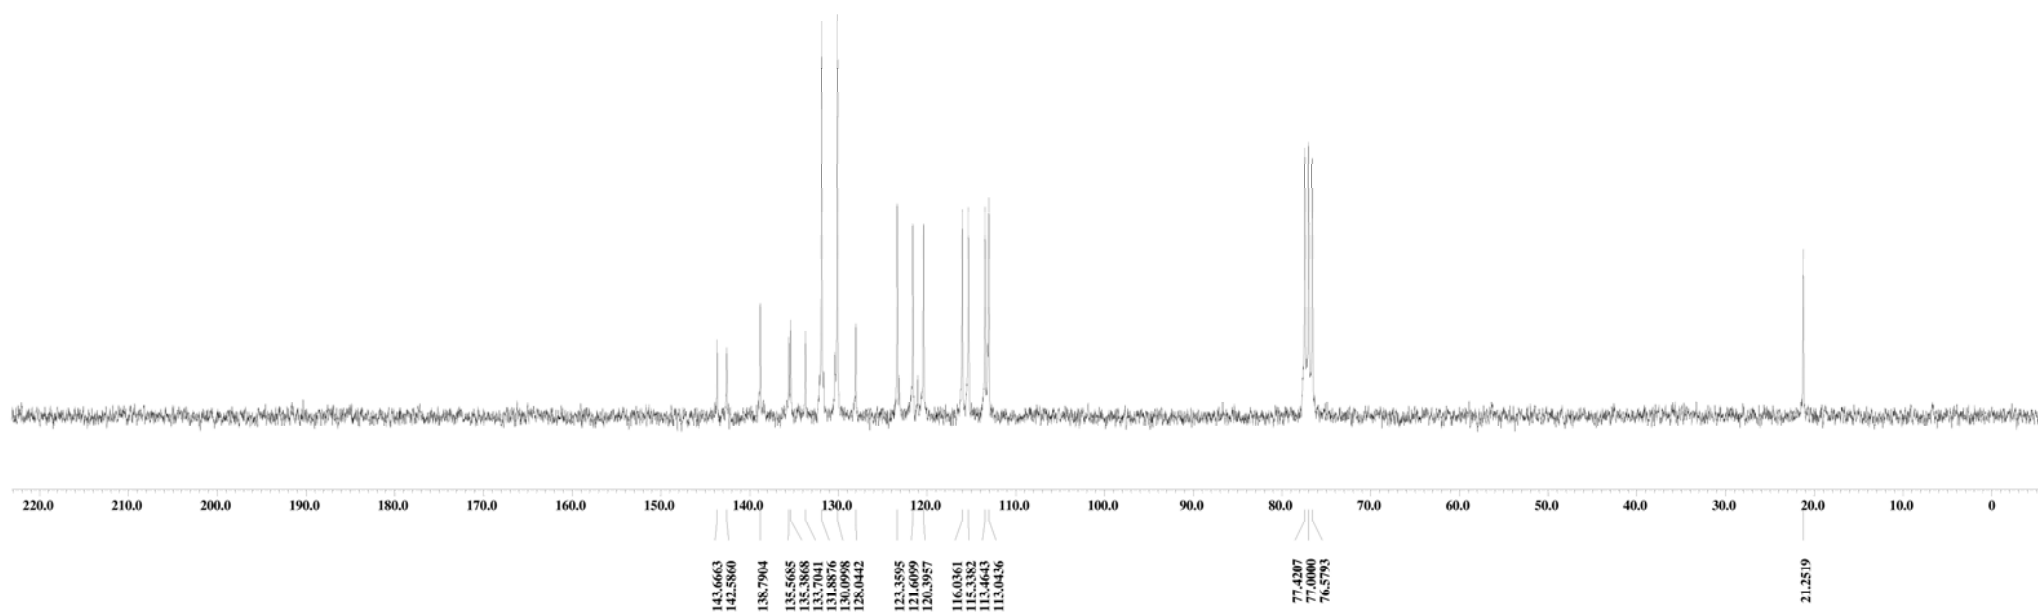

X : narts per Million : 13C

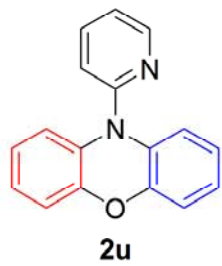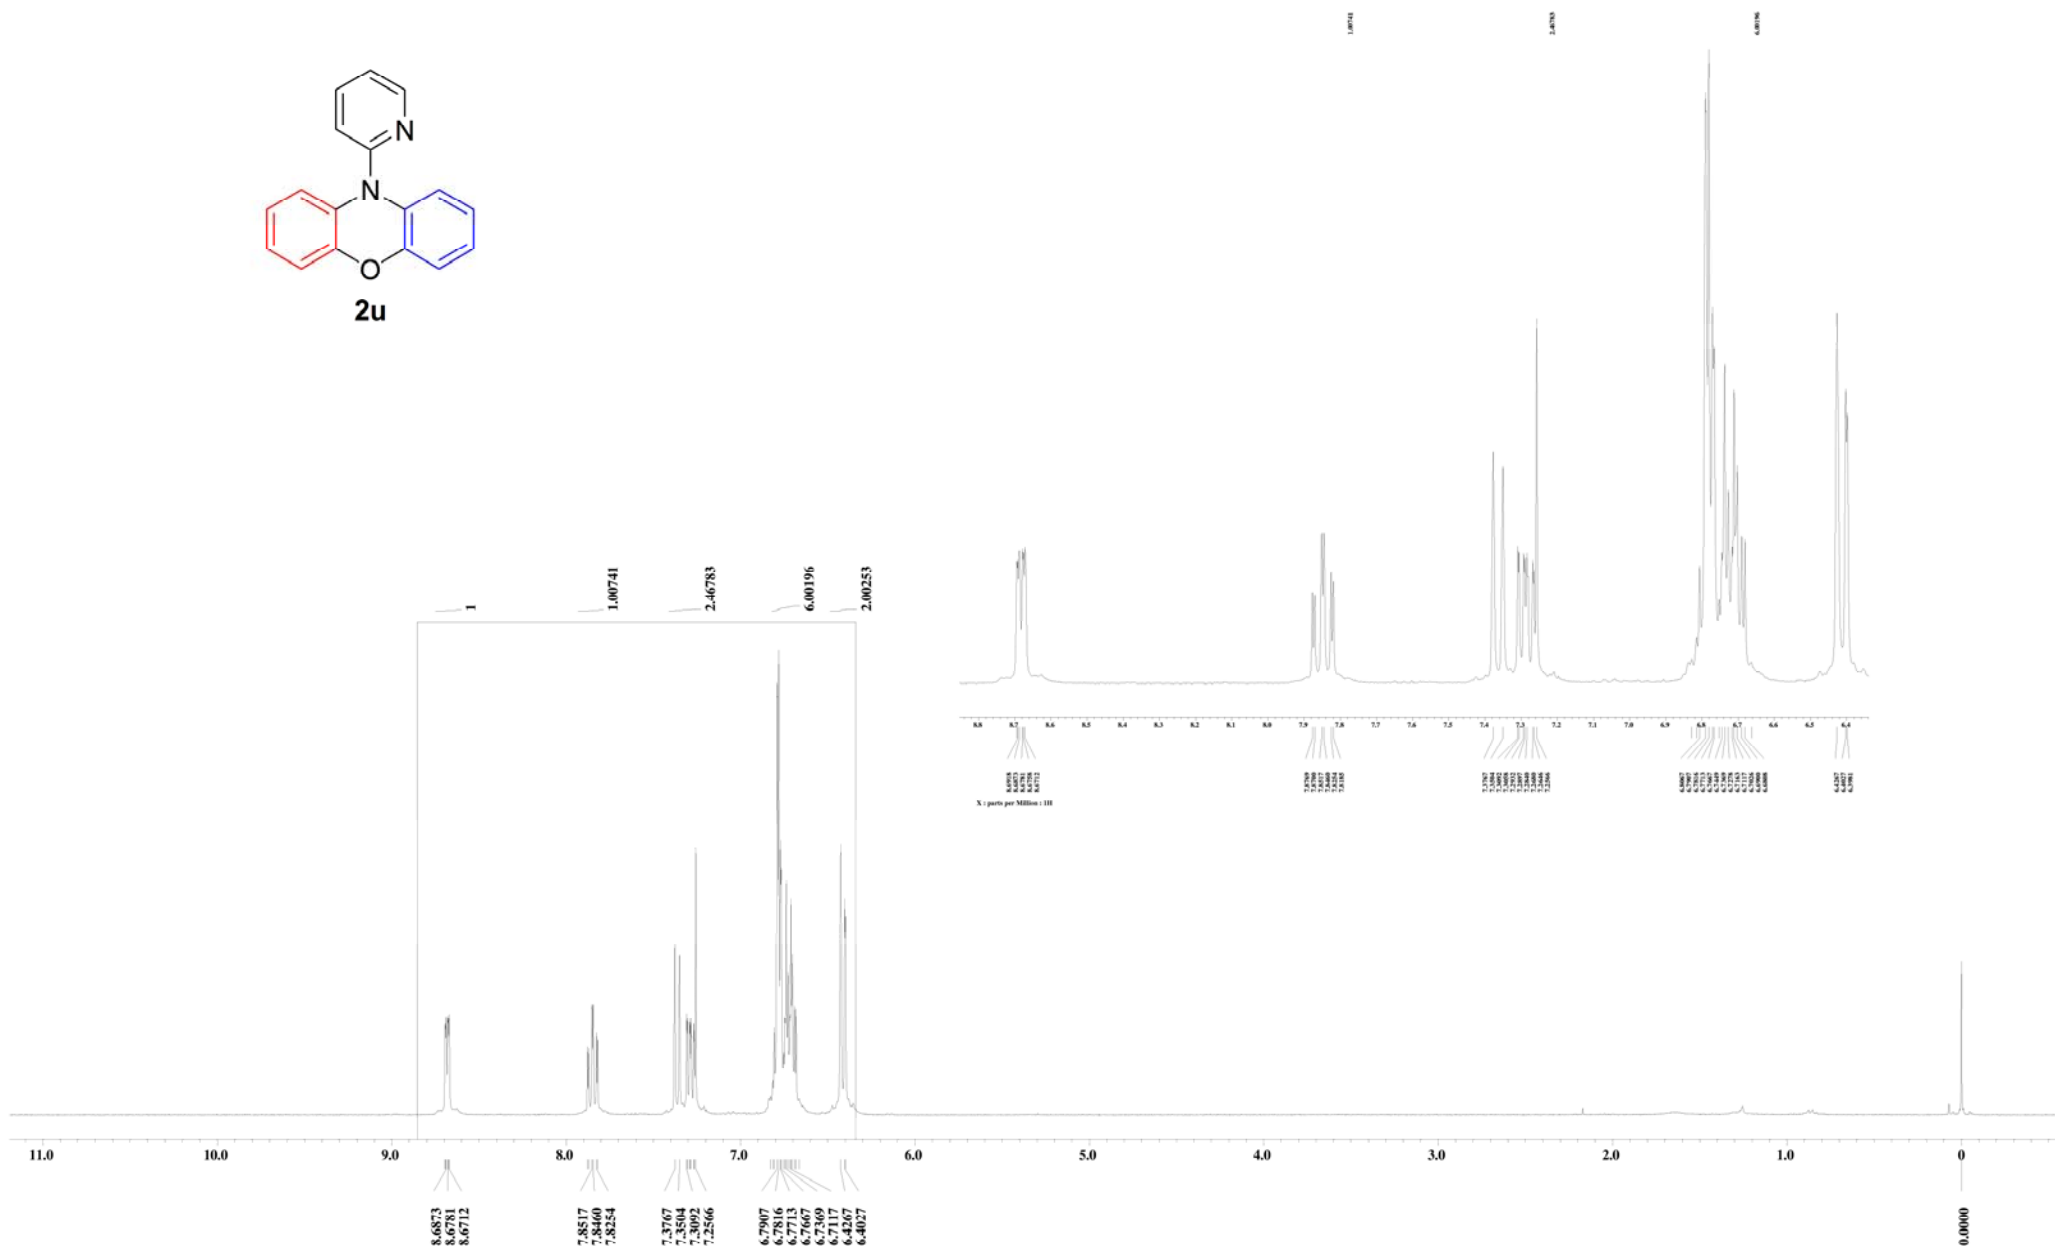

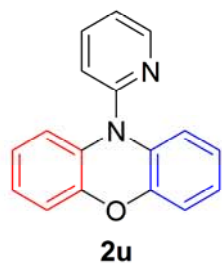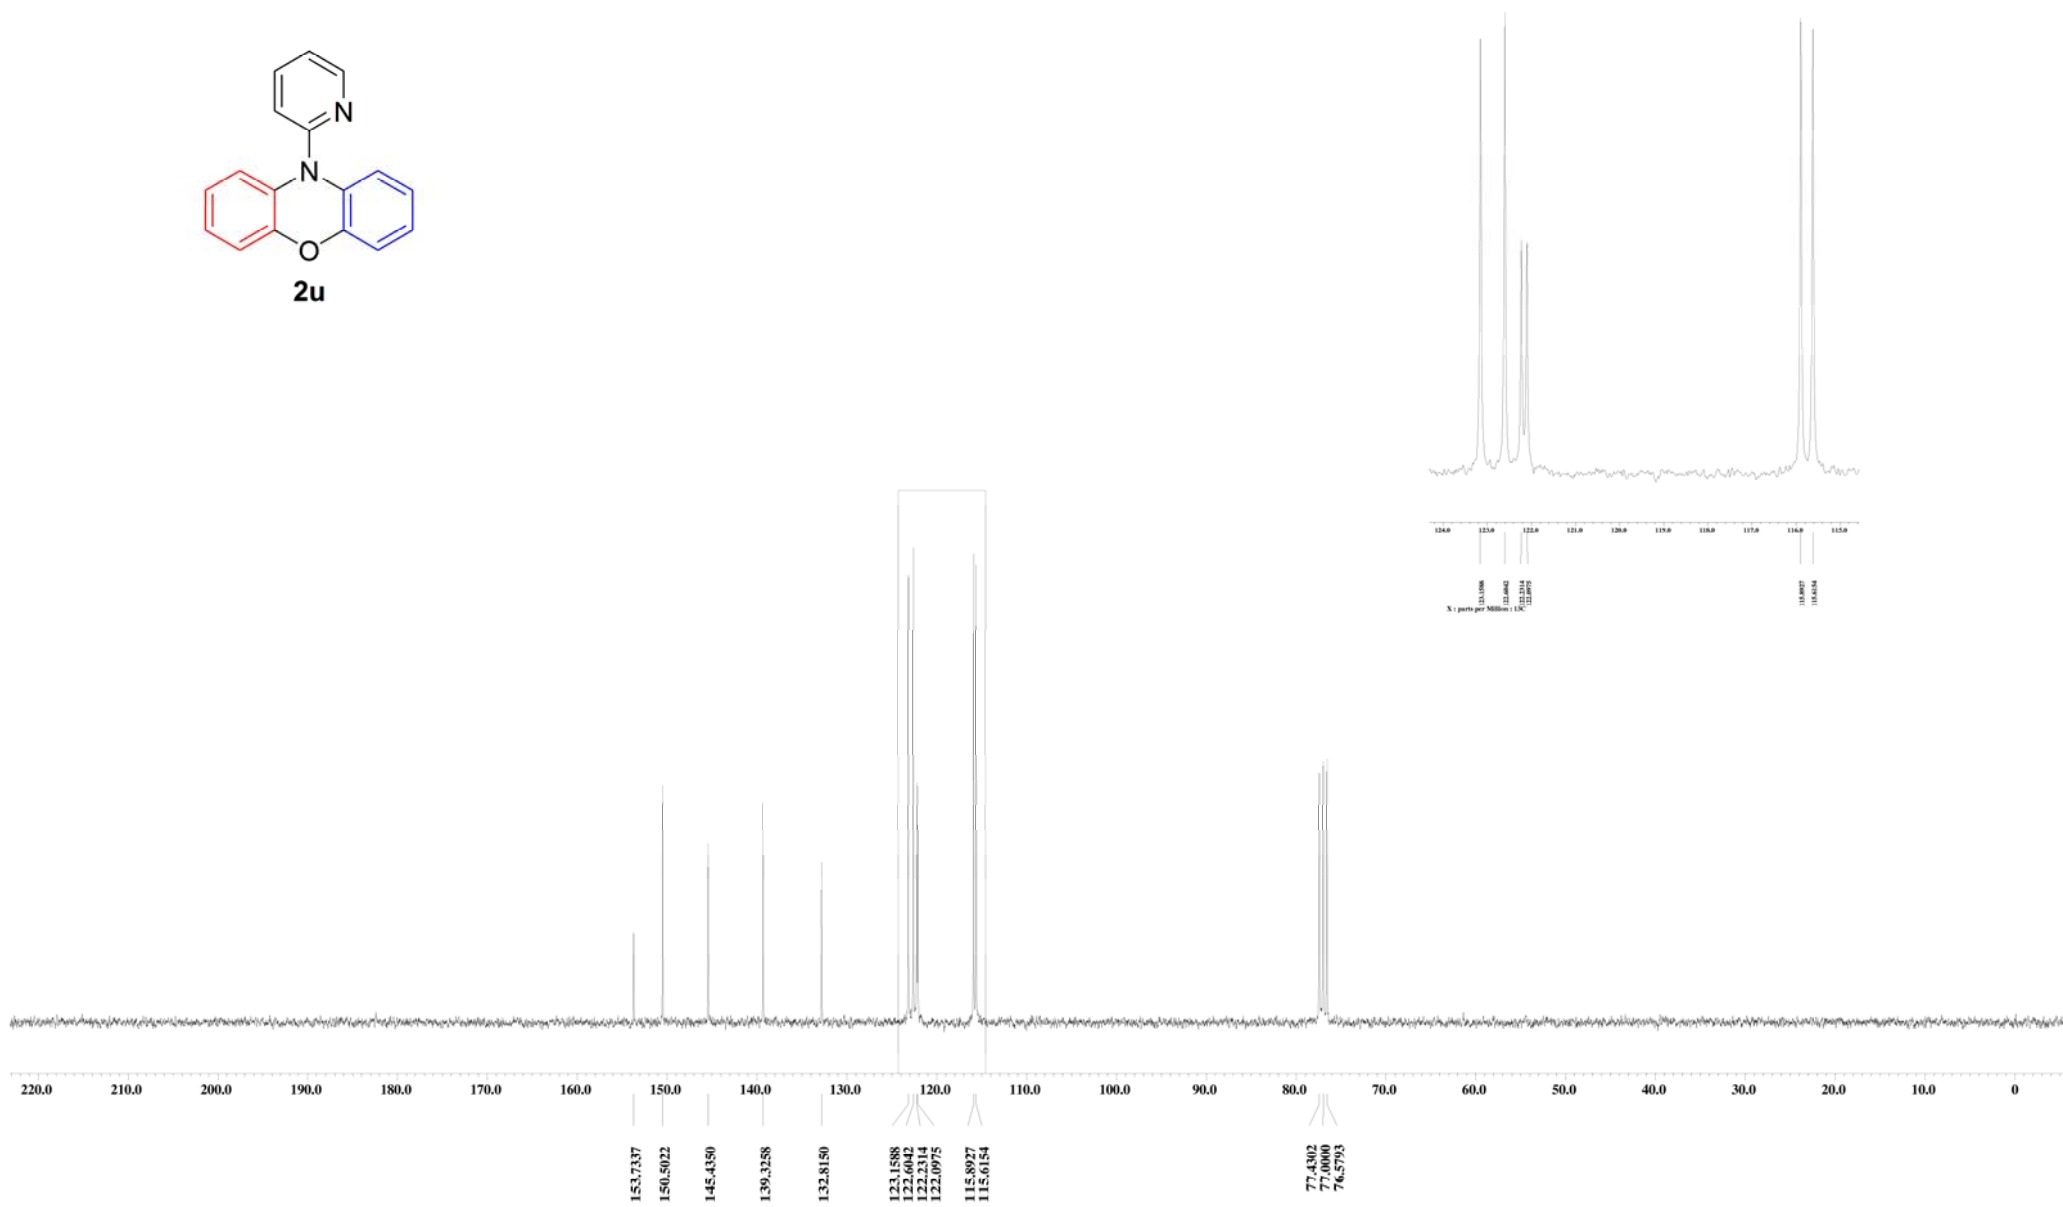

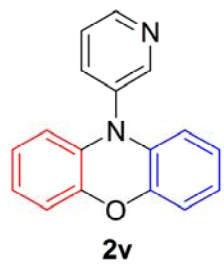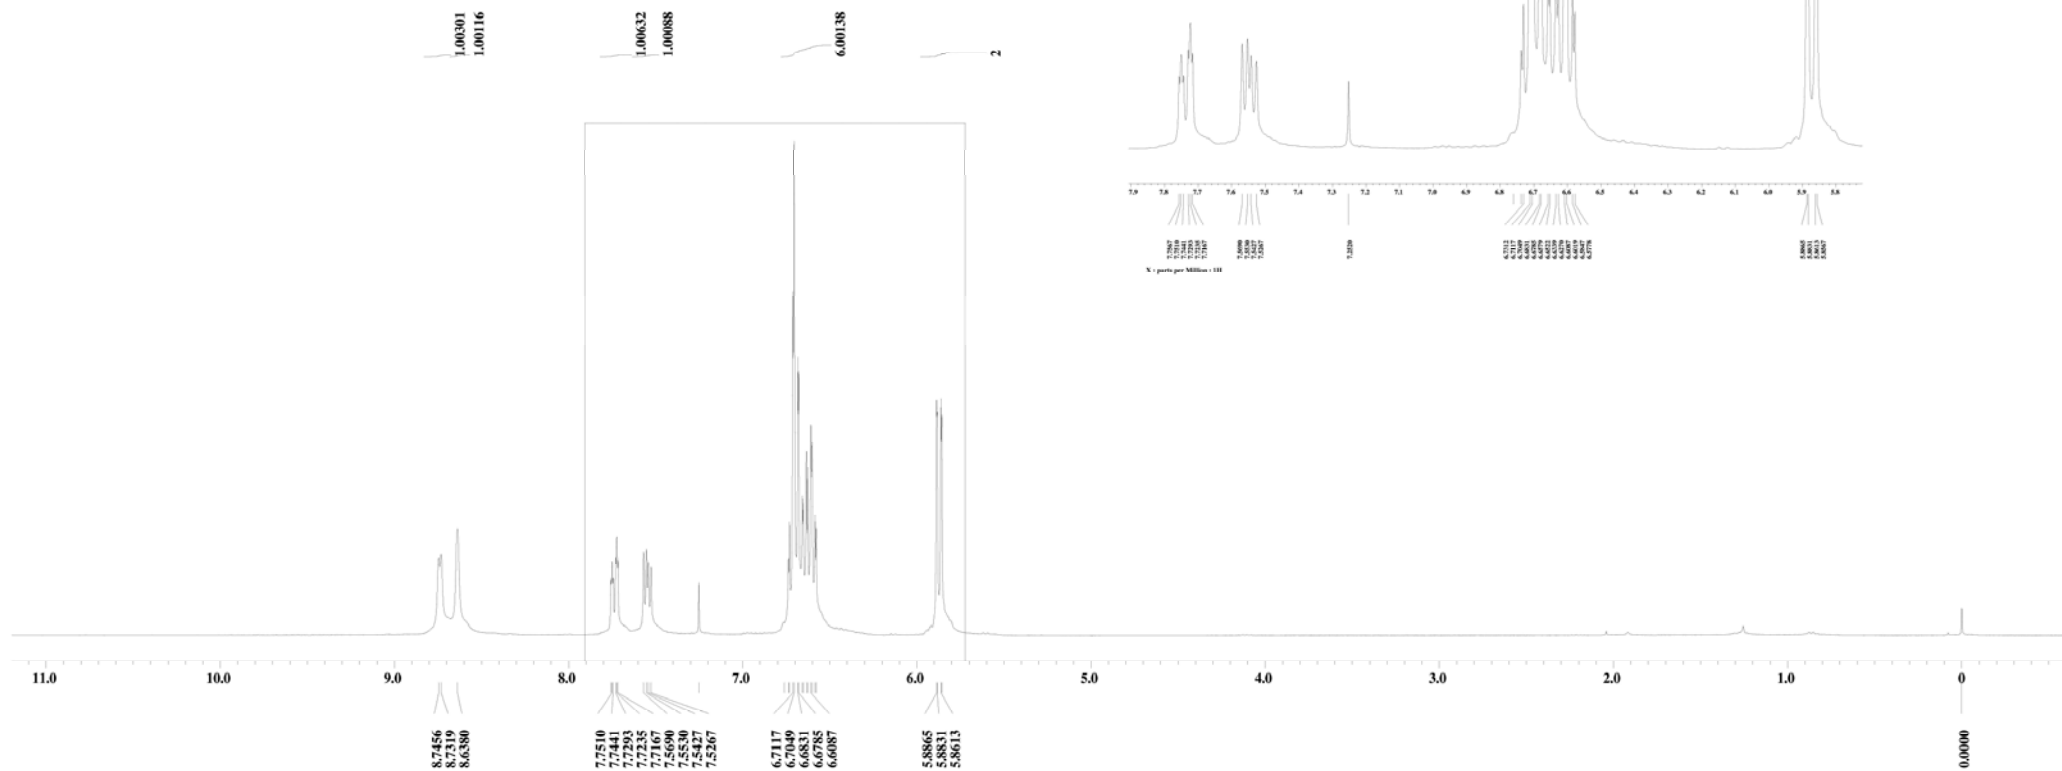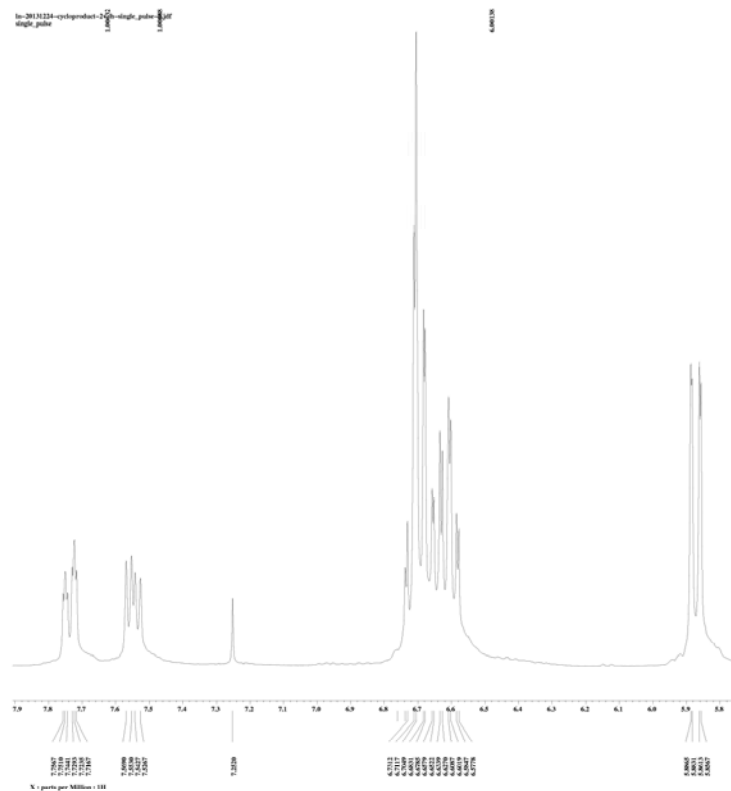

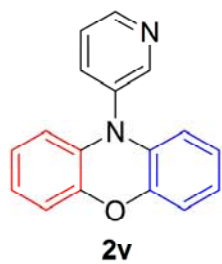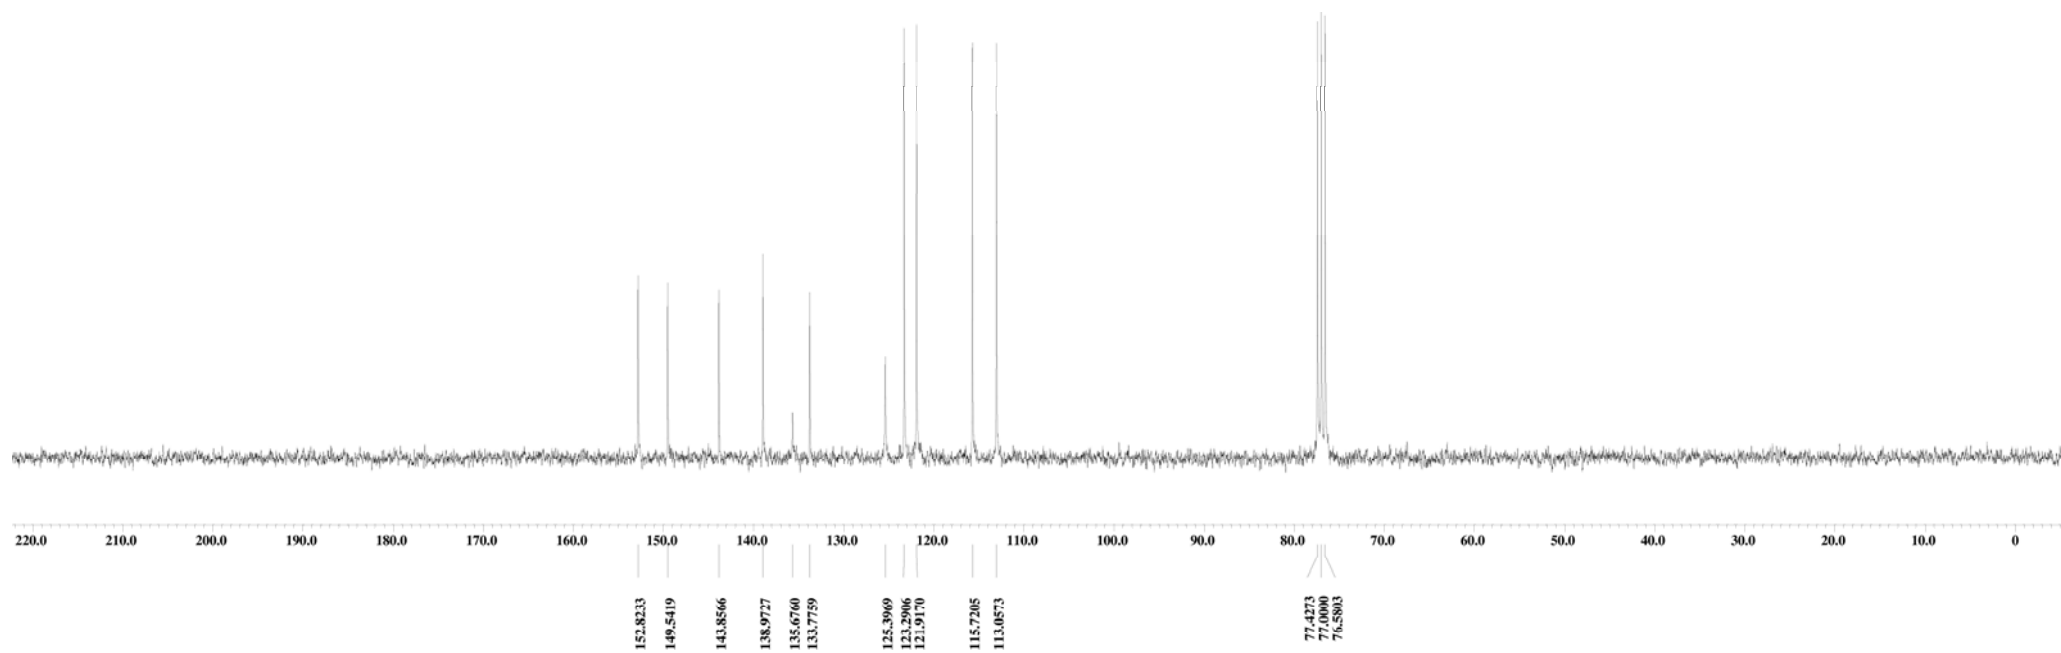

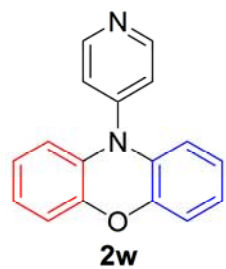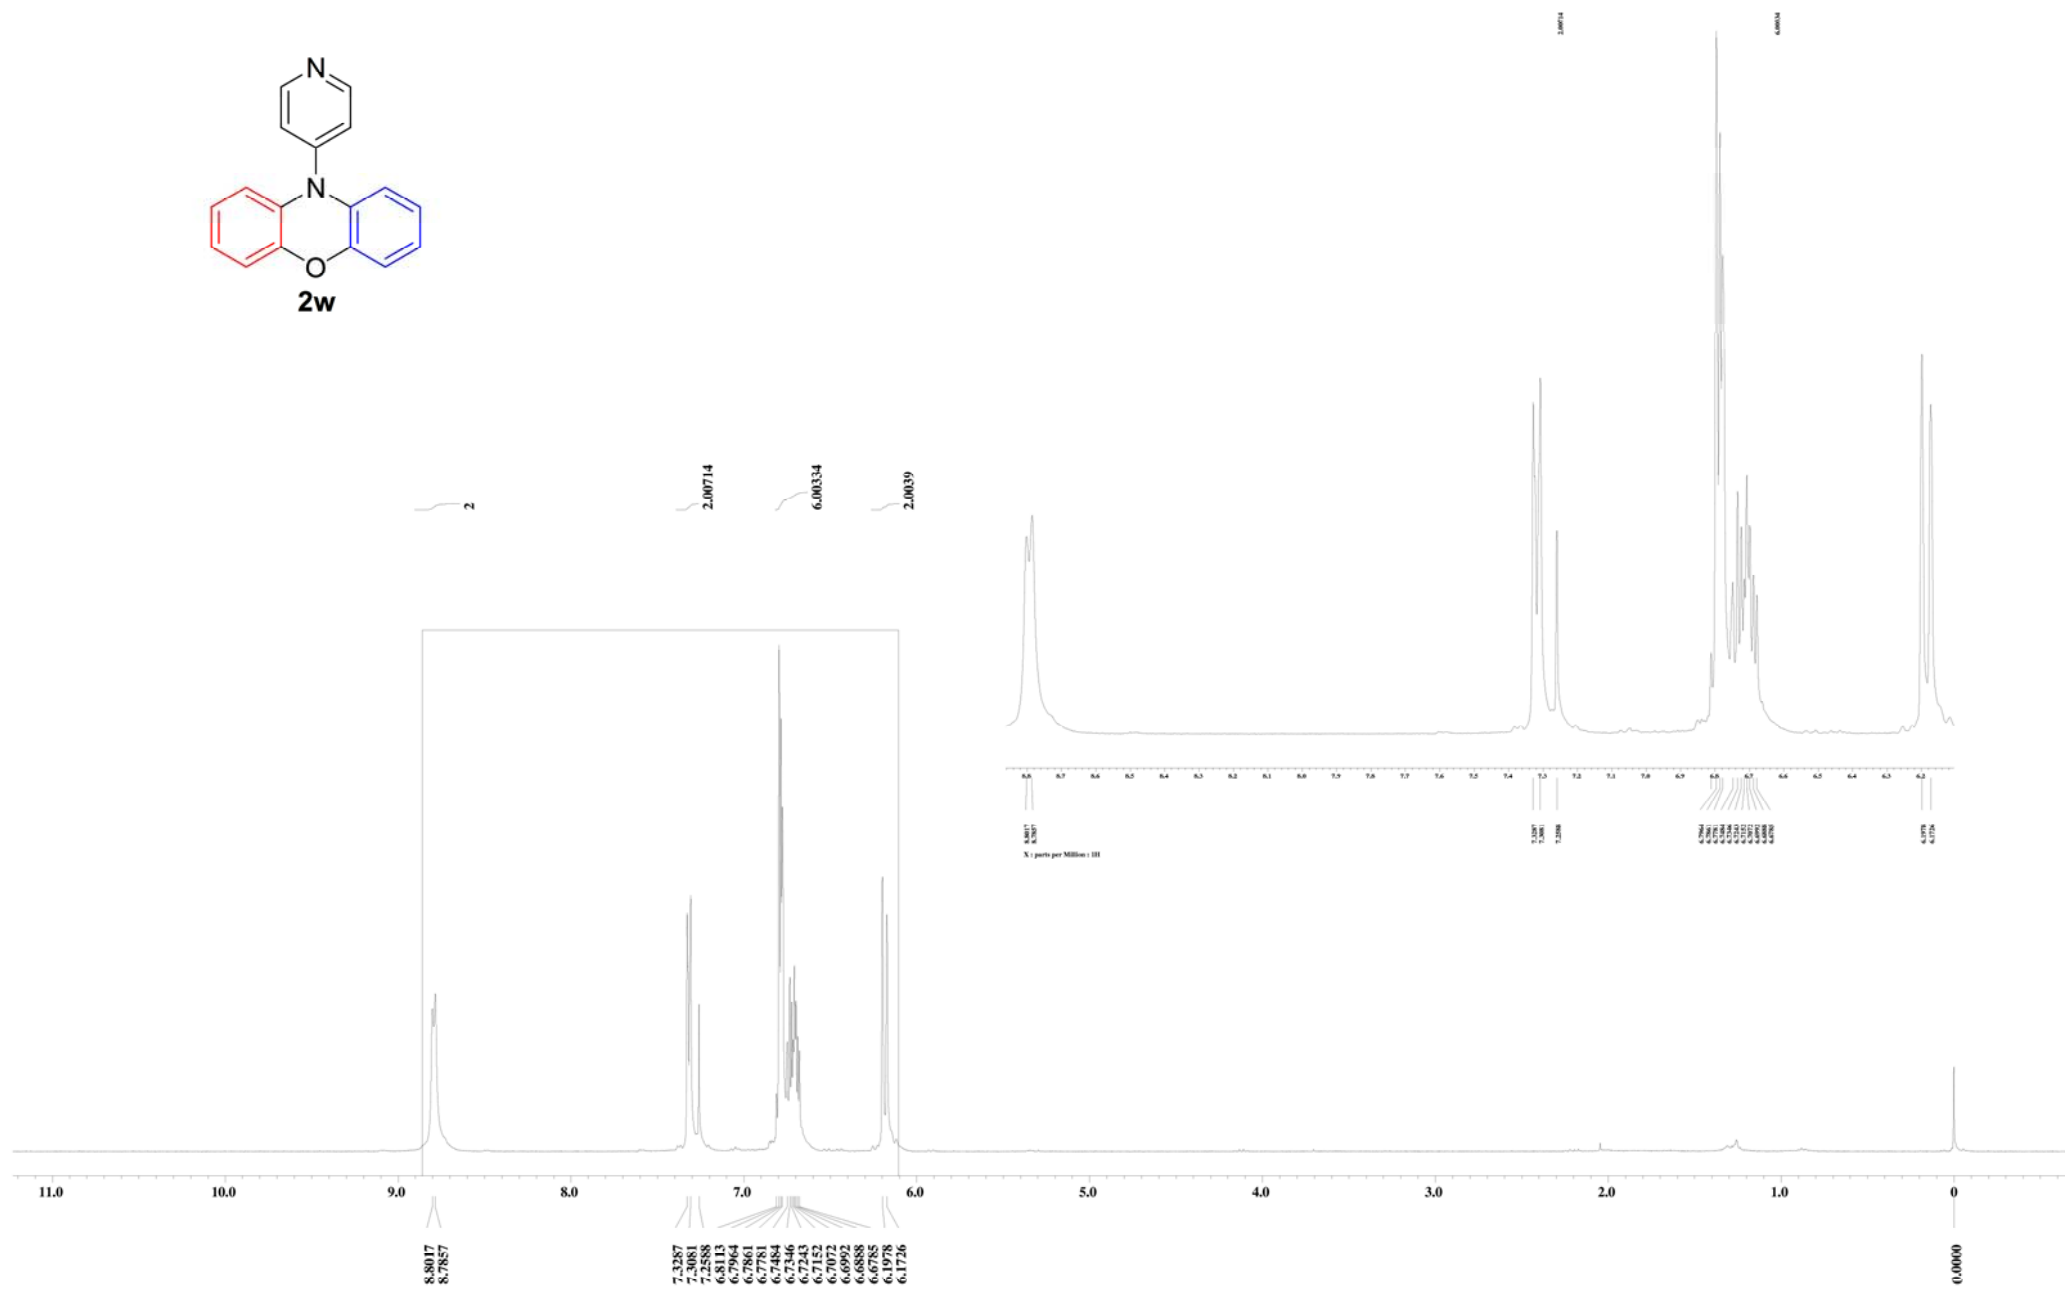



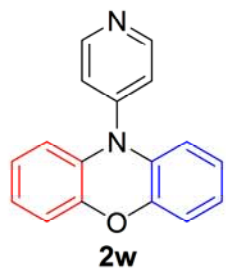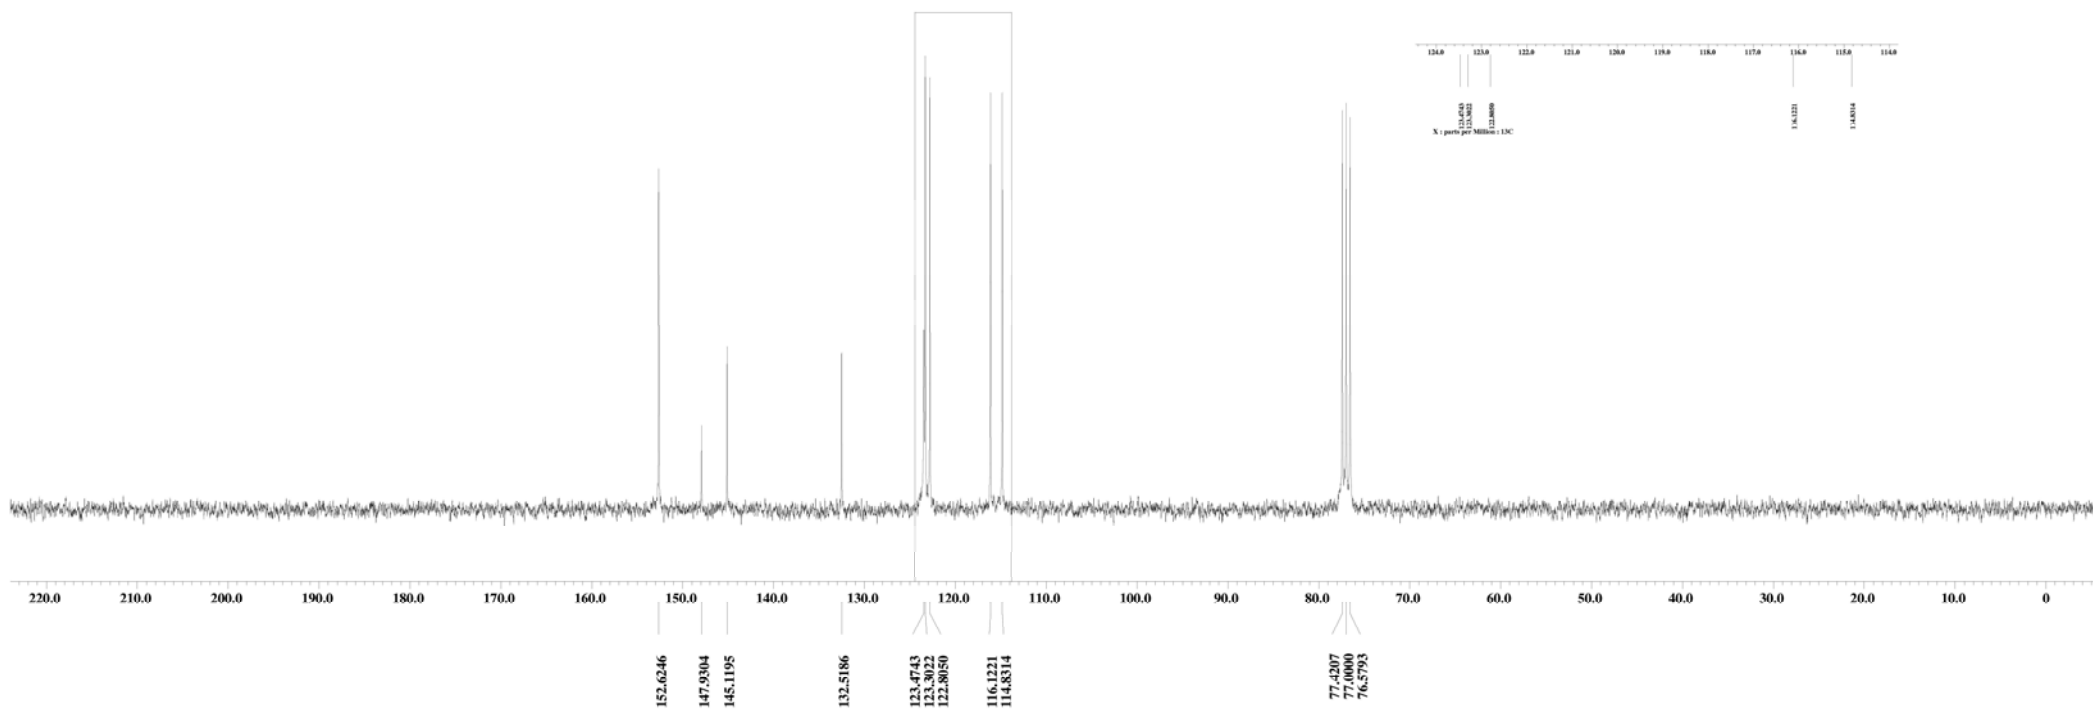

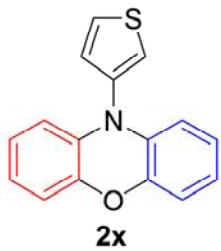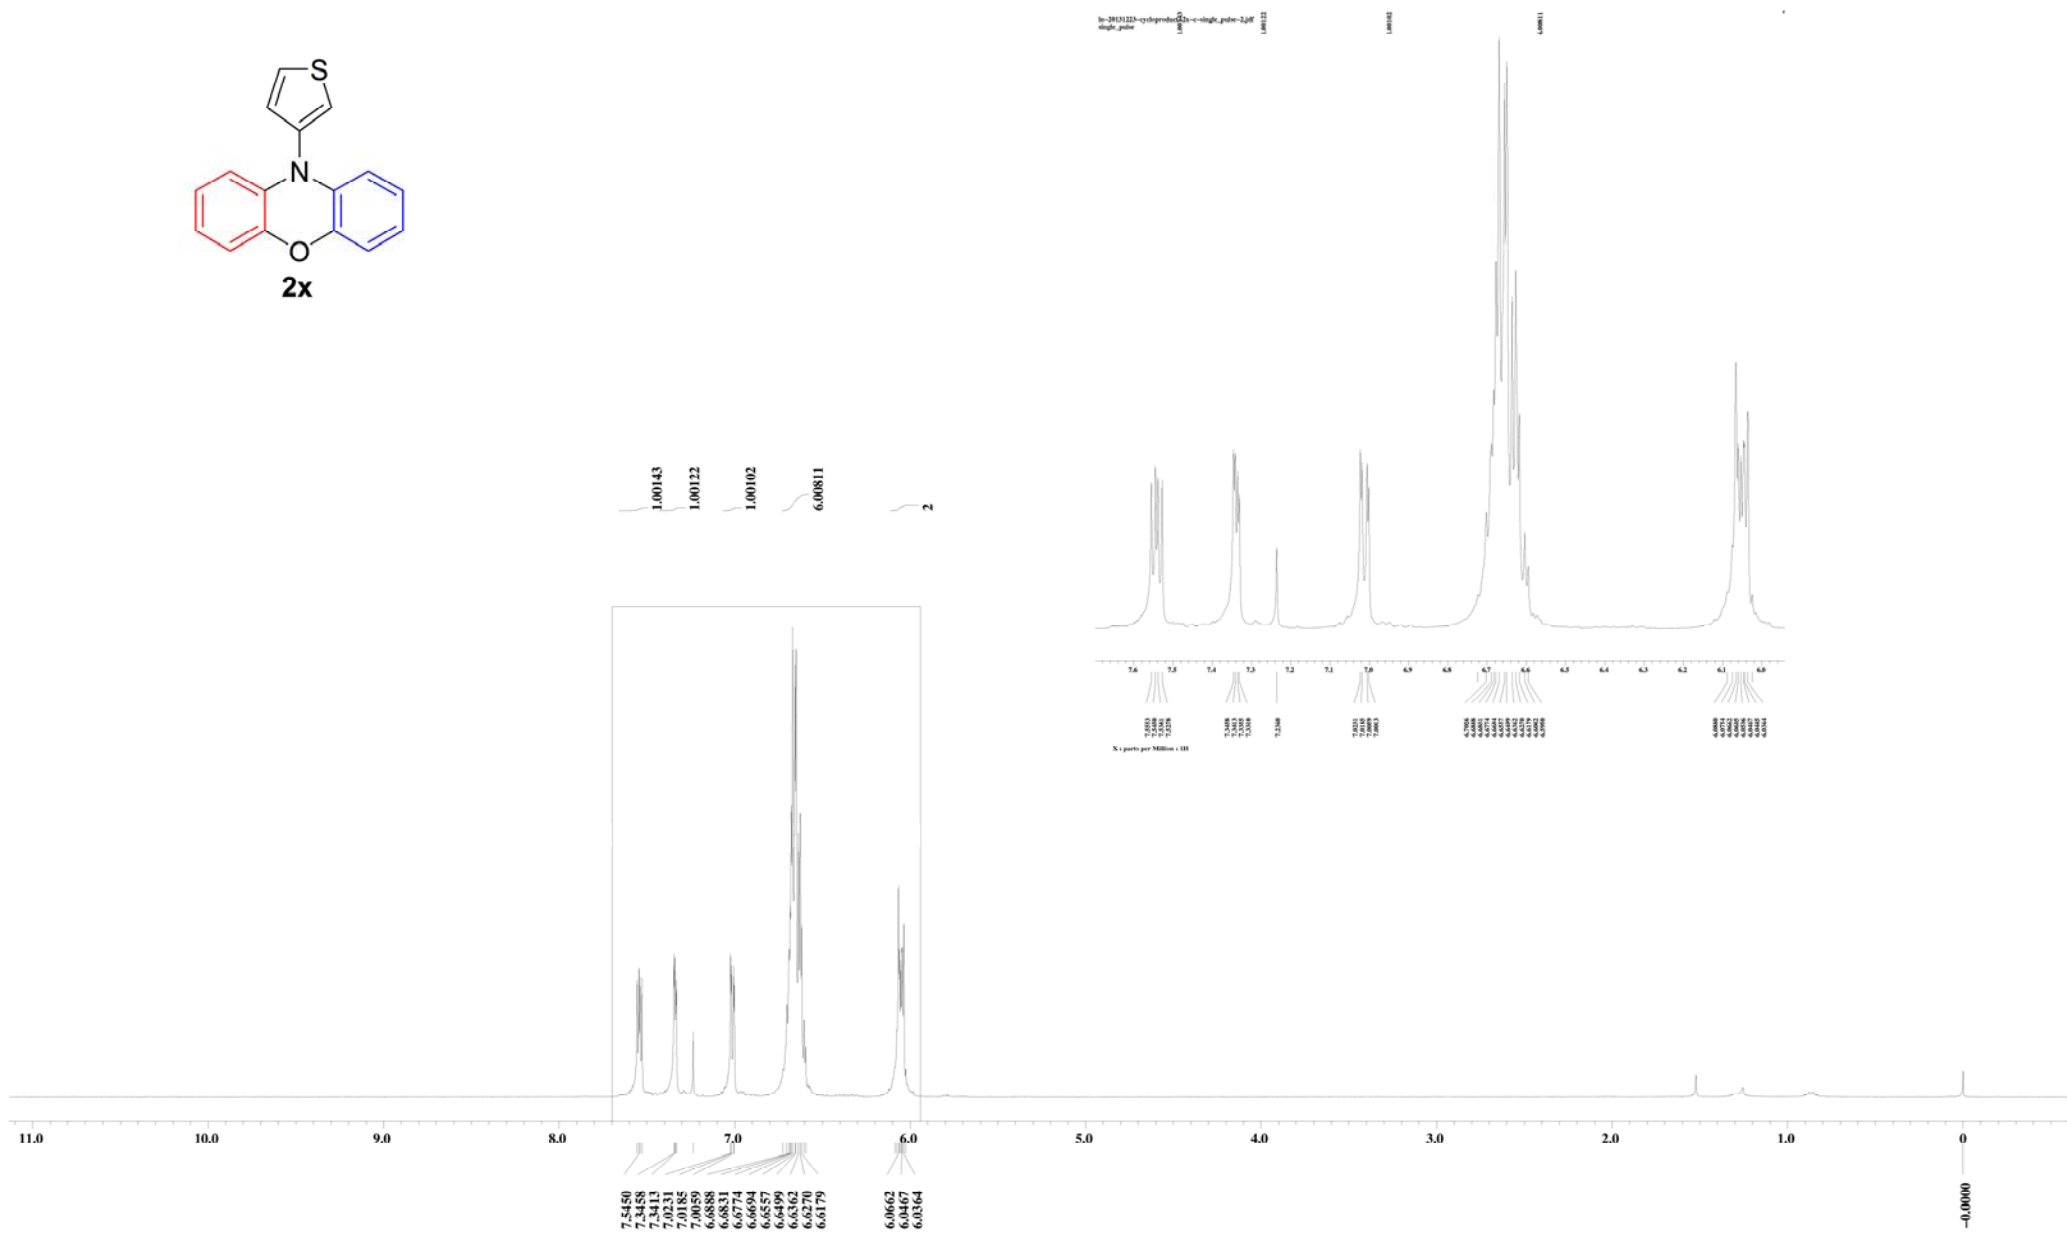

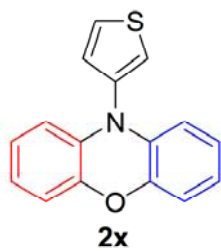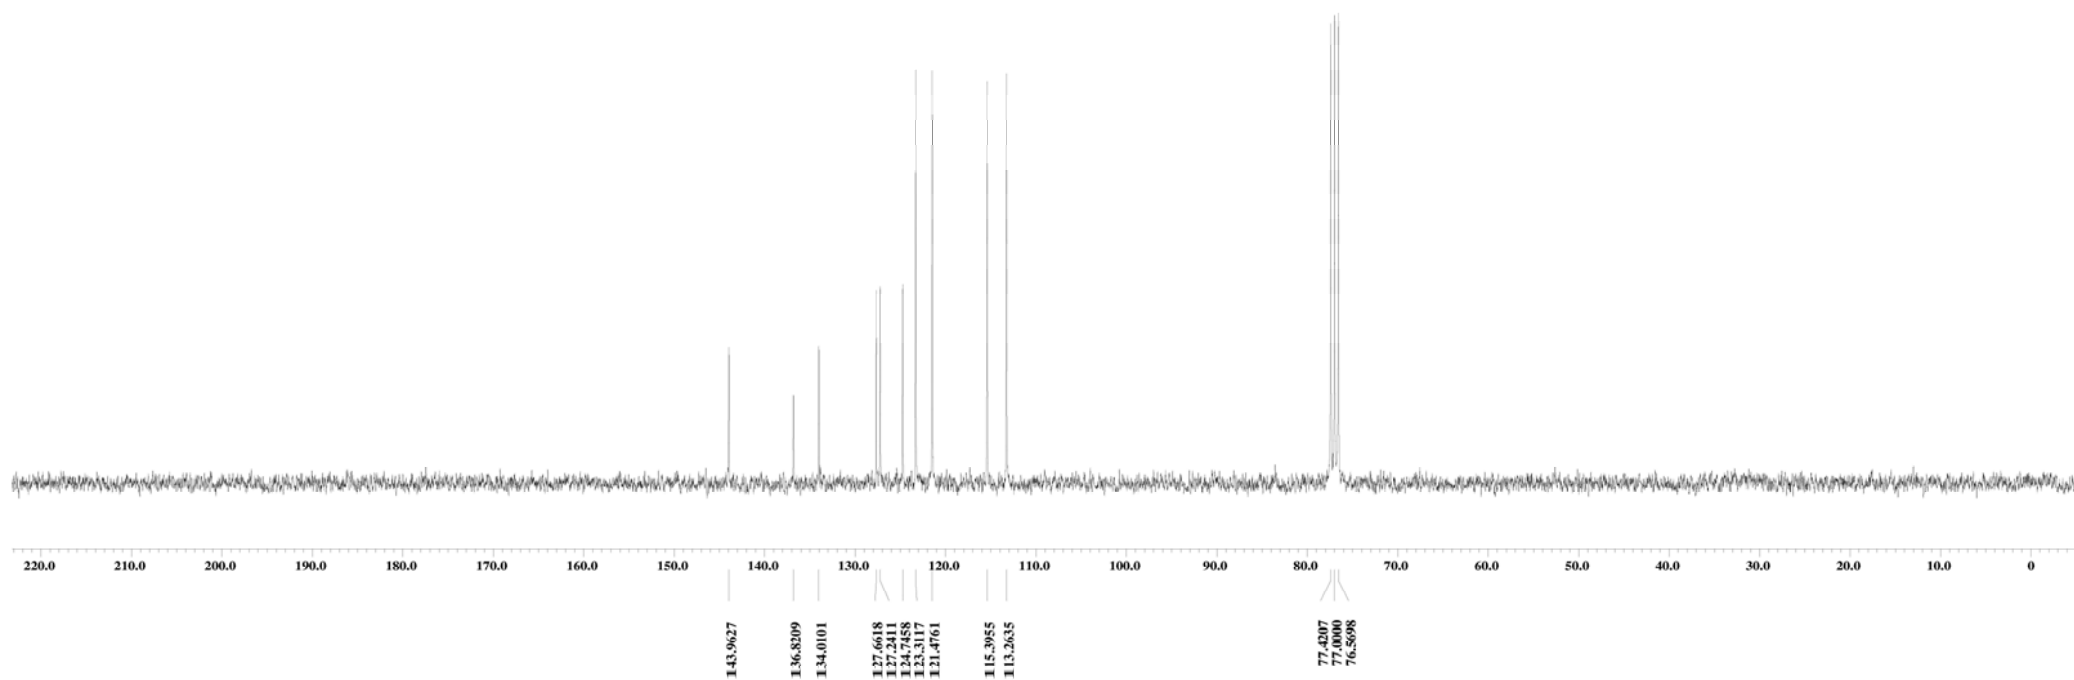

Supplement: c4ra09593f1.pdf [file c4ra09593f1.pdf]
